# Supplementary material for: Inhibitory Response to CK II Inhibitor Silmitasertib and CDKs Inhibitor Dinaciclib Is Related to Genetic Differences in Pancreatic Ductal Adenocarcinoma Cell Lines
Source: MDPI journal article supplement (doi:10.3390/ijms23084409), 2022-04-16

Supplementary Figure S1

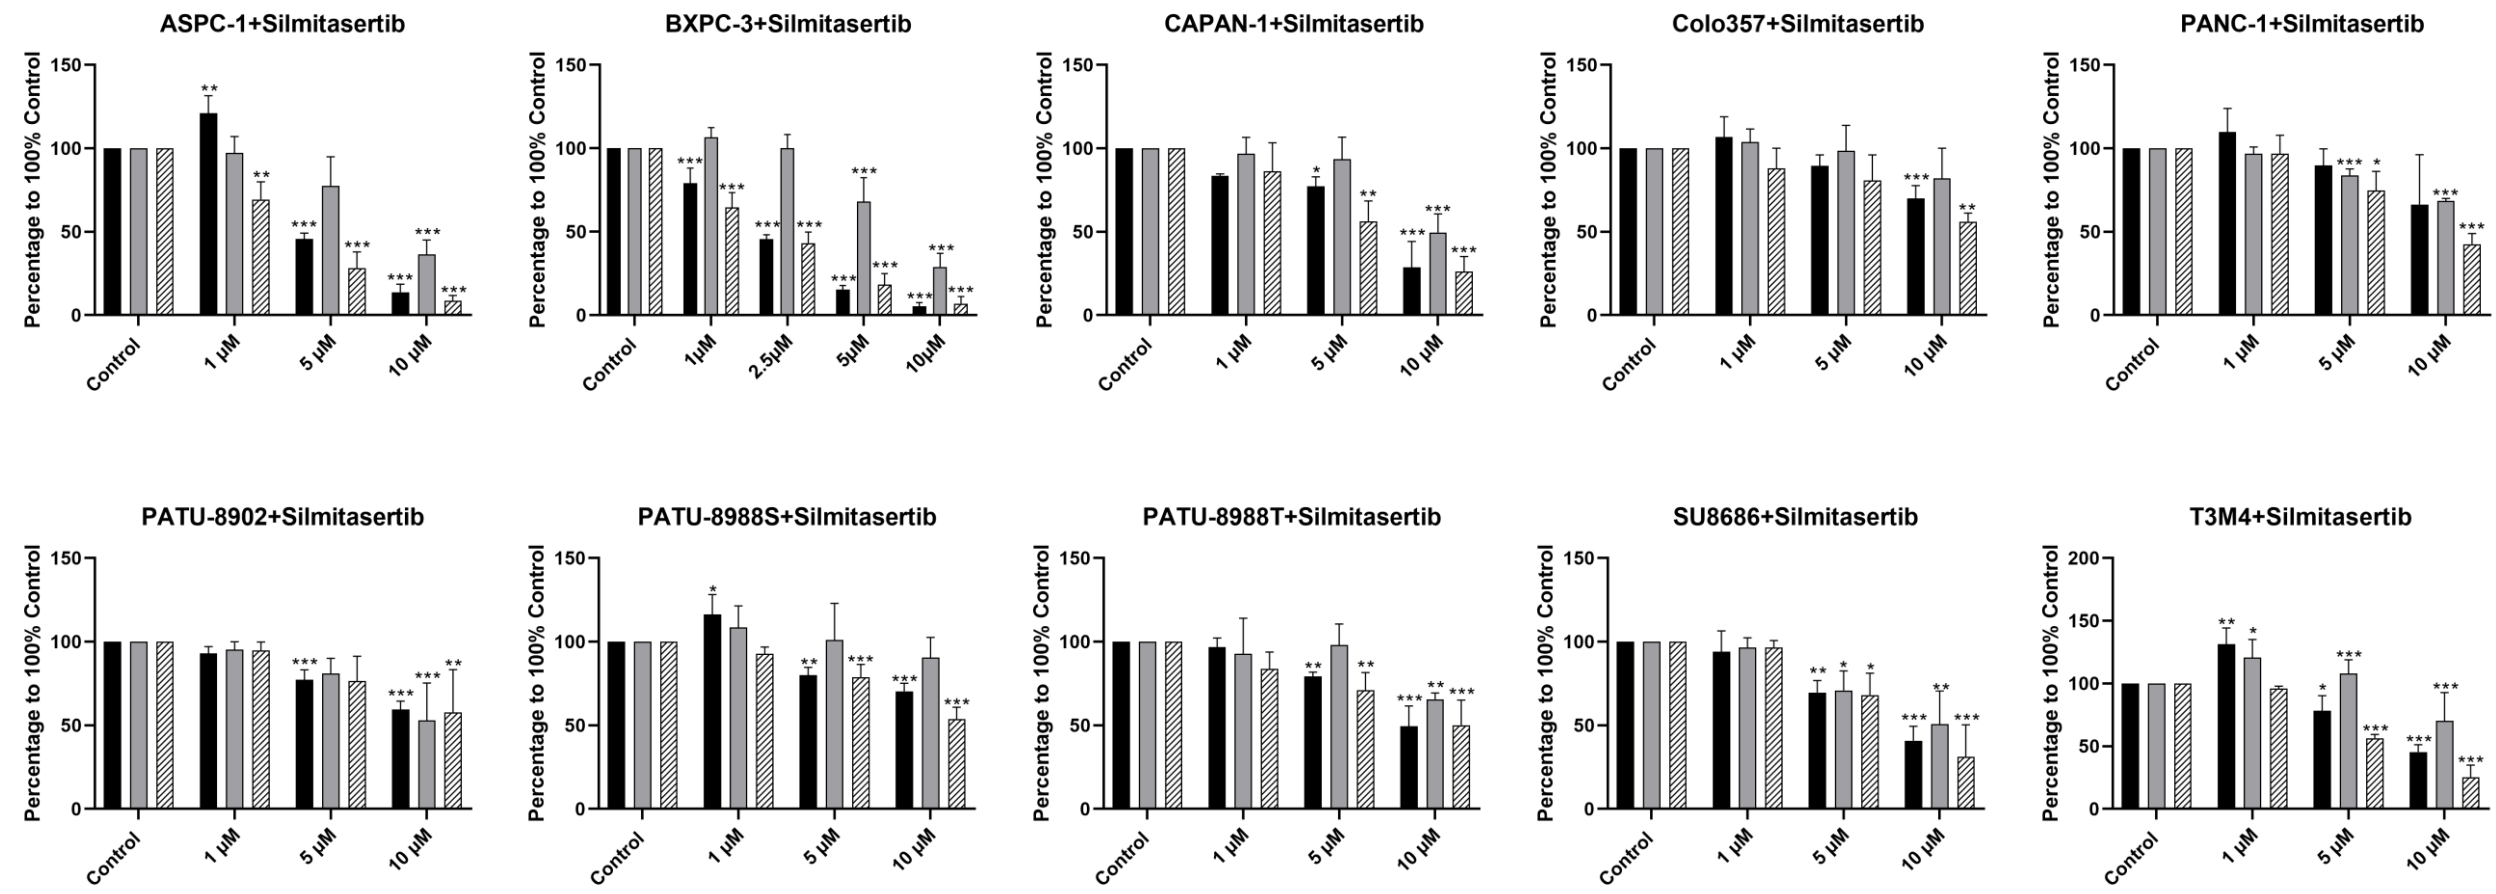

**Supplementary Figure S1.** Cell viability after 72h Silmitasertib exposure in ten PDAC cell lines. Data are presented as Mean  $\pm$  SD. Significance of a treatment effect (which showed in bar charts) compared to the DMSO control was determined by one-way ANOVA or Kruskal-Wallis-Test and displayed as \*:  $P < 0.033$ , \*\*:  $P < 0.002$ , \*\*\*:  $P < 0.001$  ( $n \geq 3$ ).

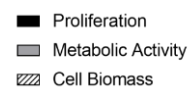

Supplementary Figure S2

a:

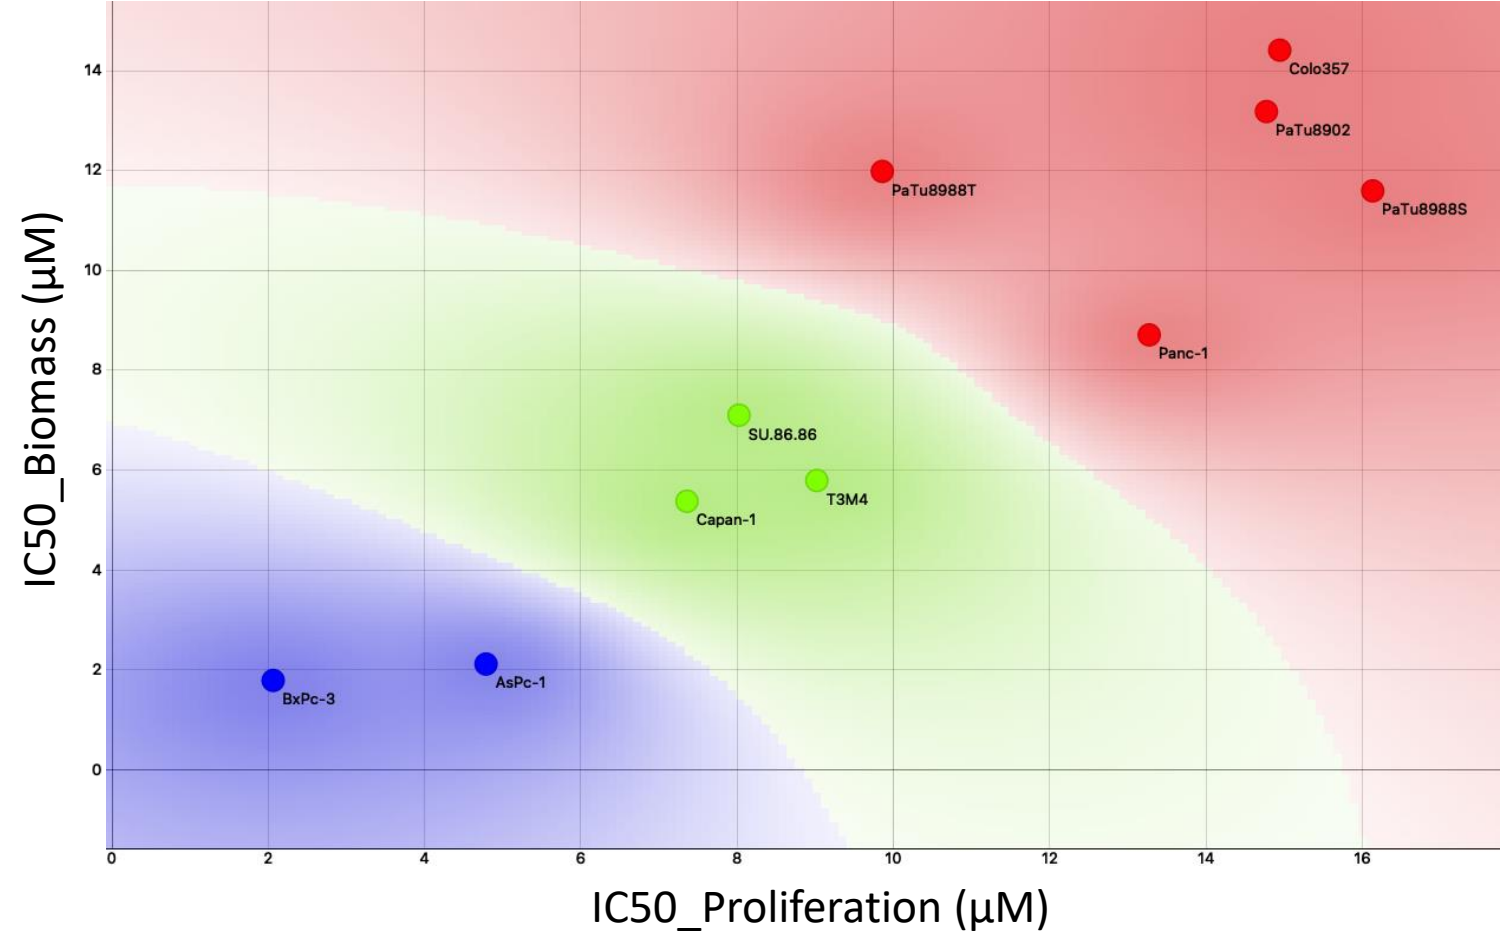

**Supplementary Figure S2.** Clustering (a) and Silhouette score (b) results based on IC50 of cell proliferation and biomass after 72 h of Silmitasertib exposure. K-means++ (an unsupervised machine learning algorithm) was used to classify cell line to low sensitive group (red), moderate sensitive group (green), and high sensitive group (blue). In figure (a), the X- and Y- axis represent IC50 values calculated from cell proliferation and biomass. In figure (b), from top to bottom are the results of cell proliferation and biomass, the X-axis represents IC50 calculated according to cell proliferation and biomass, and the Y-axis represents the Silhouette score generated by k-means++.

b:

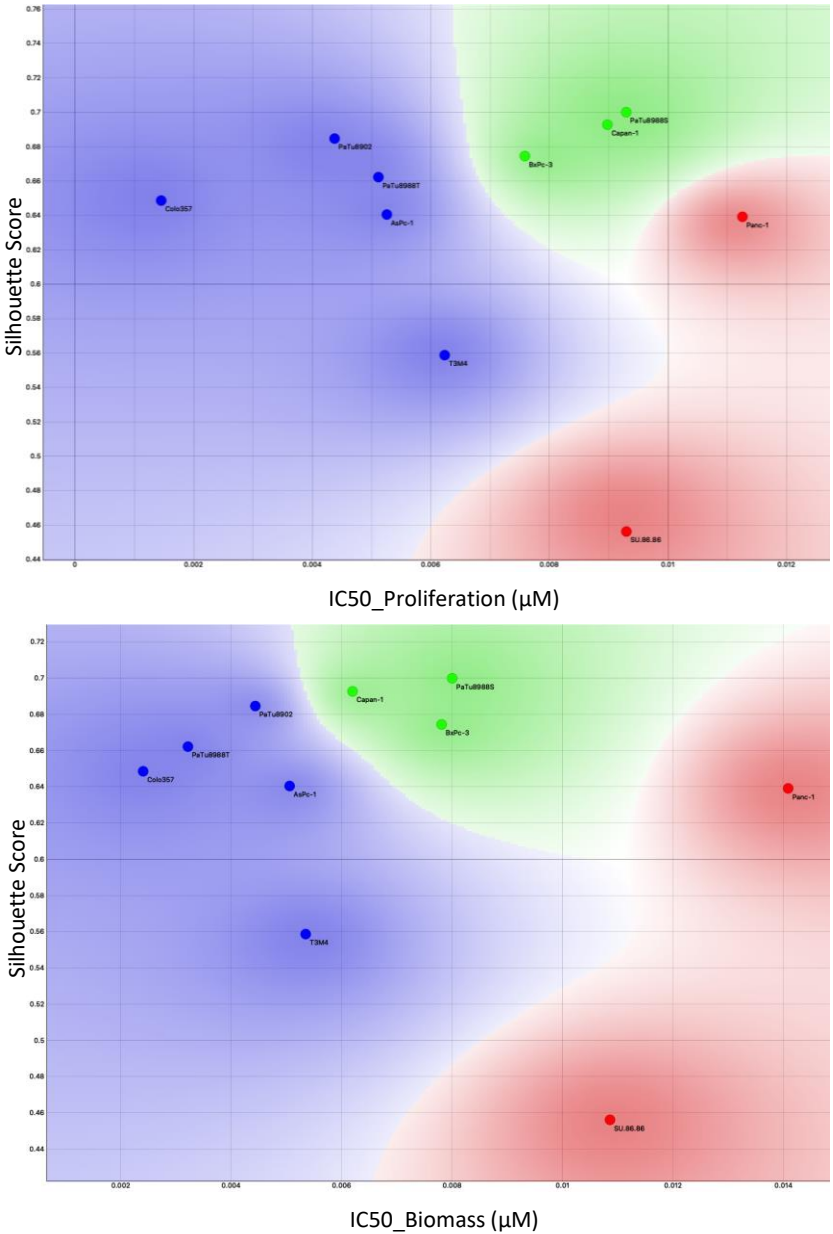

Supplementary Figure S3

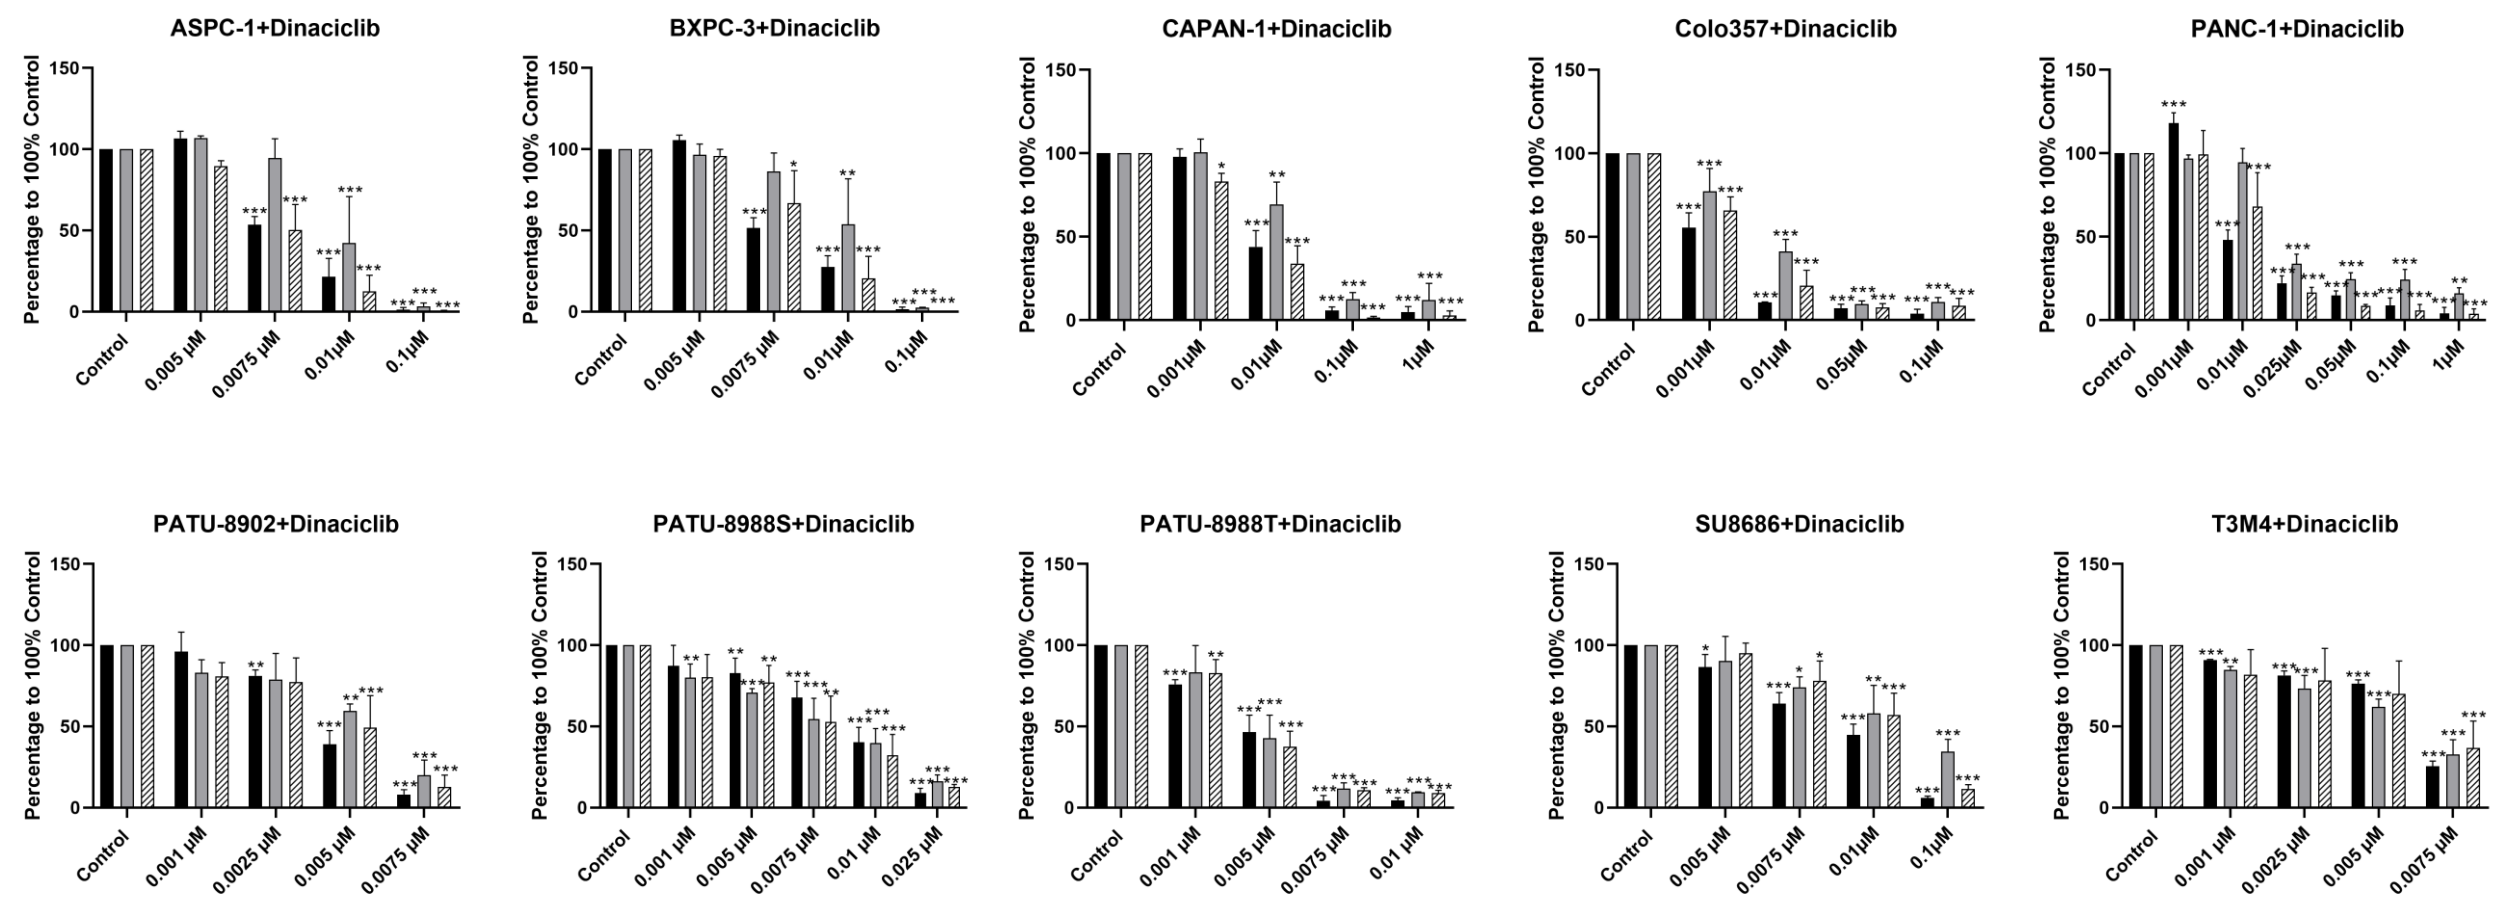

**Supplementary Figure S3.** Cell viability after 72h Dinaciclib exposure in ten PDAC cell lines. Data are presented as Mean  $\pm$  SD. Significance of a treatment effect (which showed in bar charts) compared to the DMSO control was determined by one-way ANOVA or Kruskal-Wallis-Test and displayed as \*: P< 0.033, \*\*: P< 0.002, \*\*\*: P<0.001 (n  $\geq$  3).

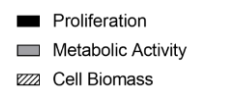

Supplementary Figure S4

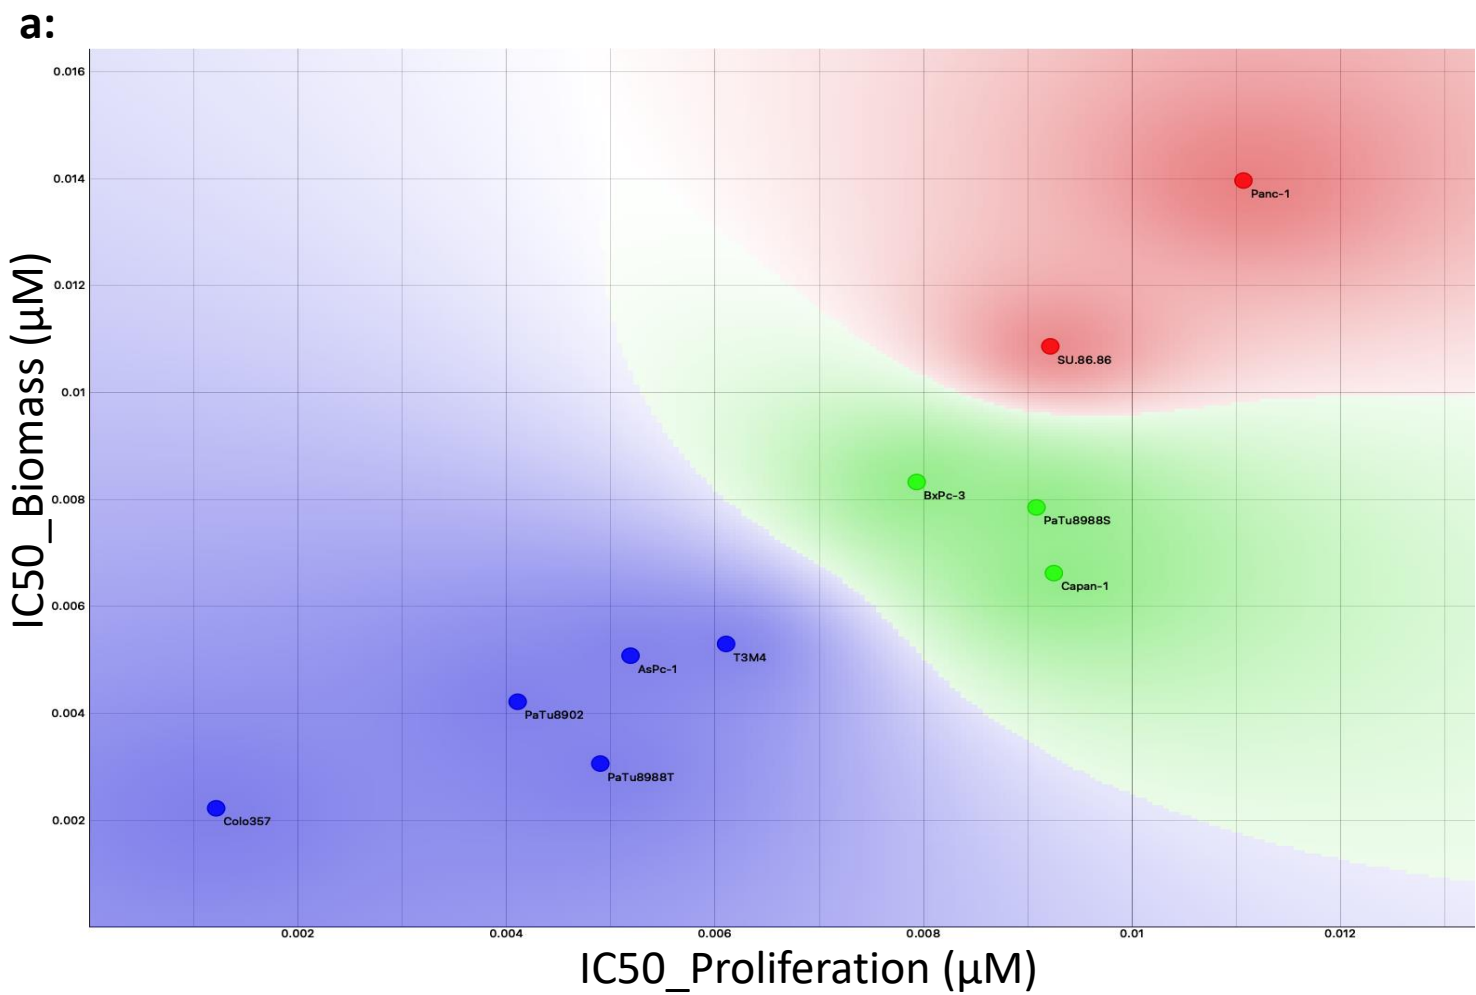

**Supplementary Figure S4.** Clustering **(a)** and Silhouette score **(b)** results based on IC50 of cell proliferation and biomass after 72 h of Dinaciclib exposure. K-means++ (an unsupervised machine learning algorithm) was used to classify cell line to low sensitive group (red), moderate sensitive group (green), and high sensitive group (blue). In figure (a), the X- and Y- axis represent IC50 values calculated from cell proliferation and biomass. In figure (b), from top to bottom are the results of cell proliferation and biomass, the X-axis represents IC50 calculated according to cell proliferation and biomass, and the Y-axis represents the Silhouette score generated by k-means++.

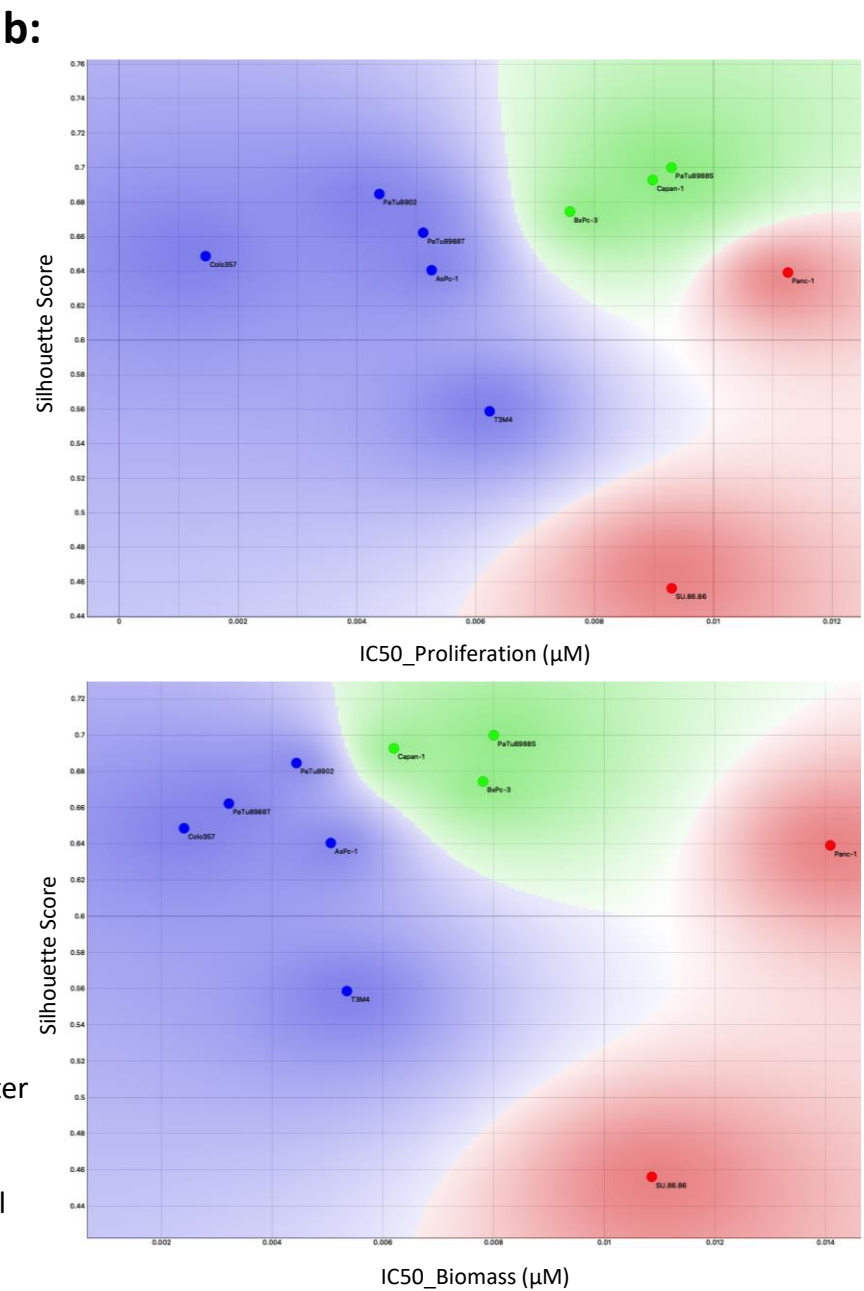

Supplementary Figure S5

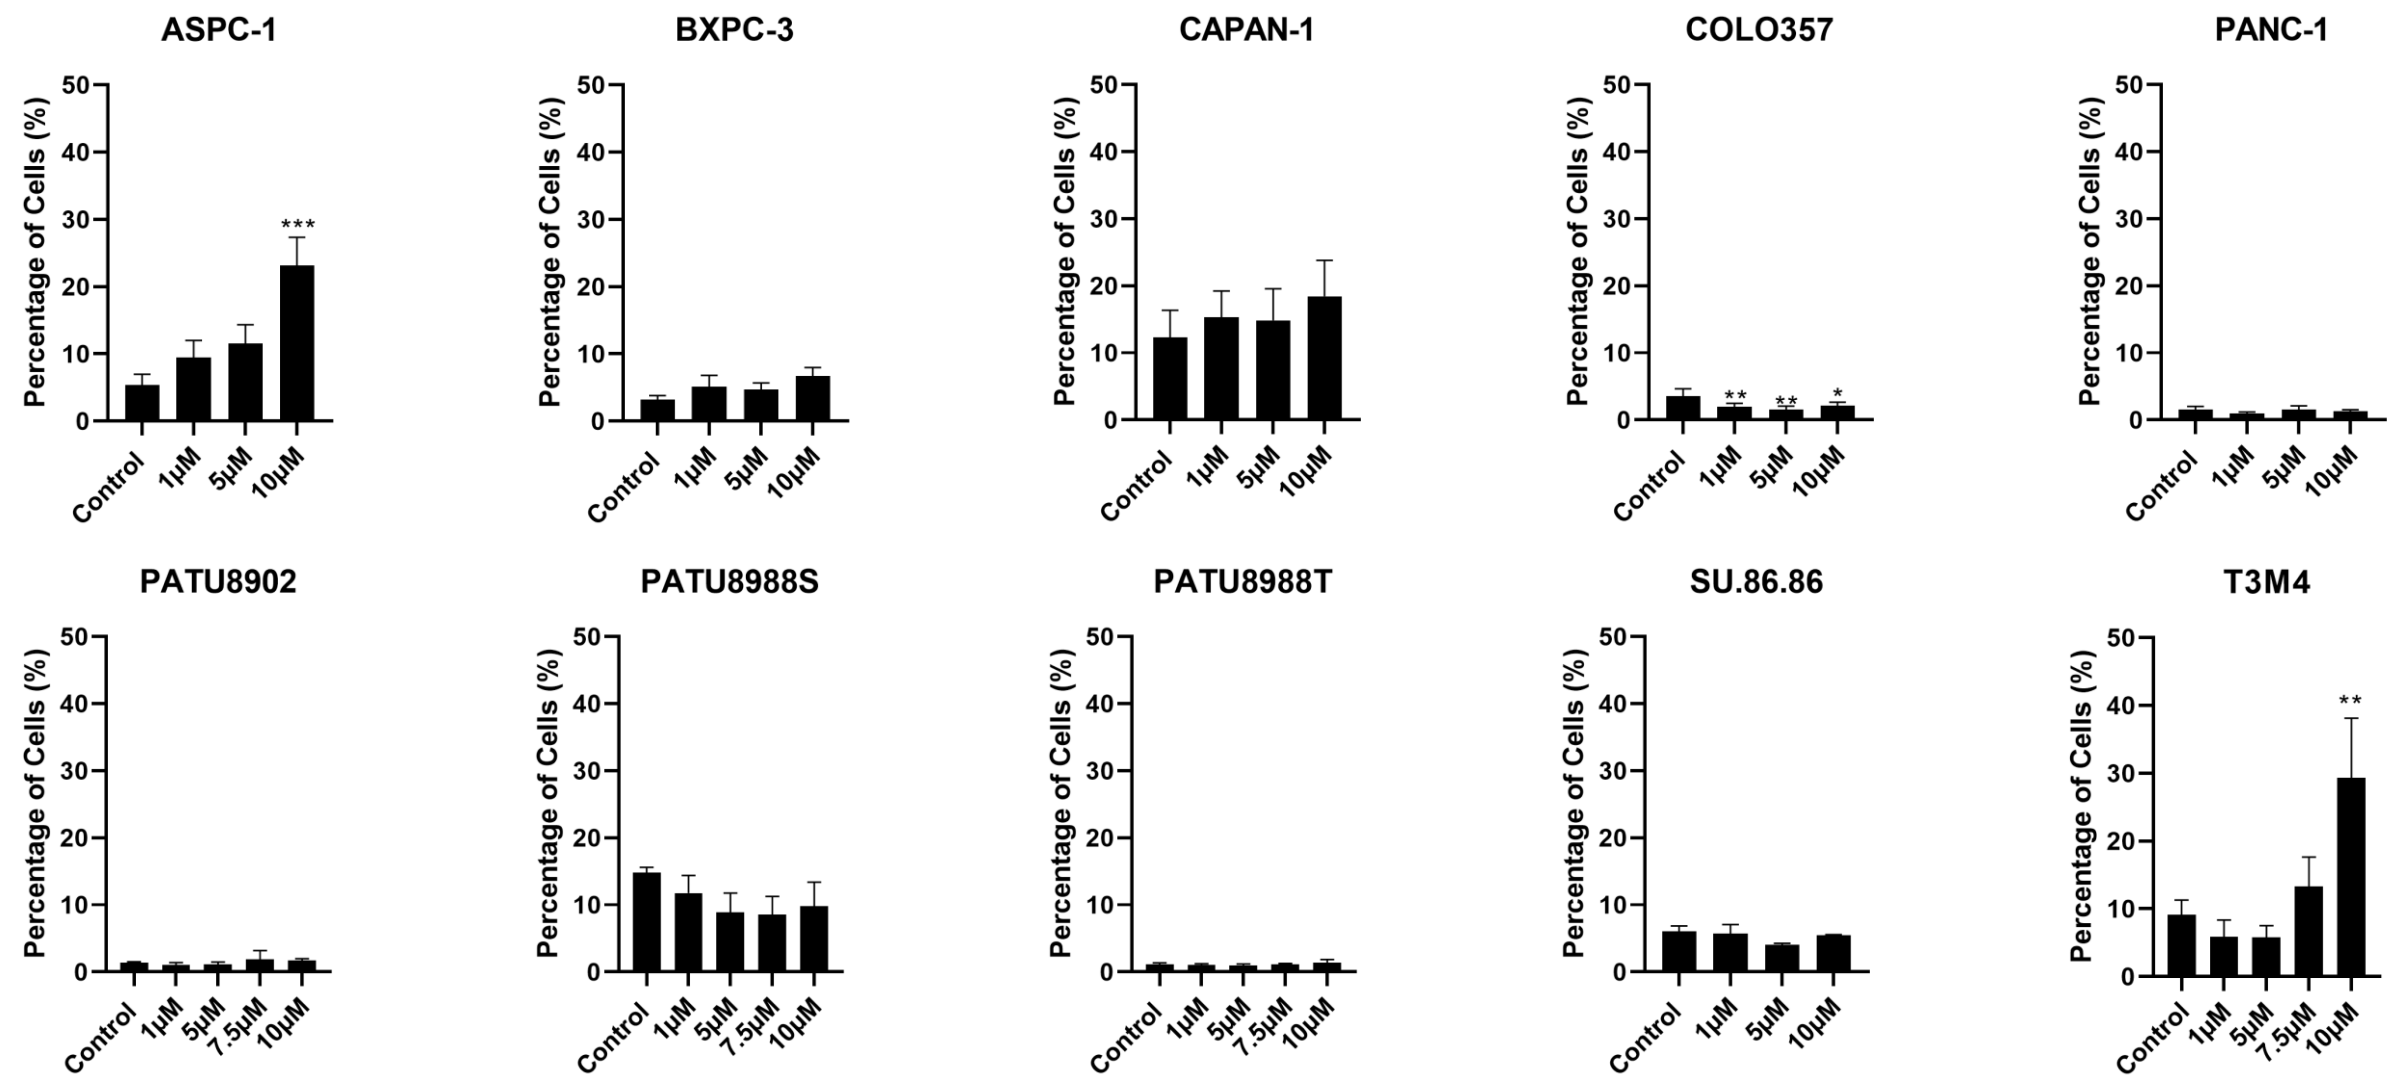

**Supplementary Figure S5.** Apoptosis/necrosis induction in 10 PDAC cell lines after 72h Silmitasertib exposure. Induction of apoptosis/necrosis was determined by flow cytometry after Yo-Pro 1 FITC and propidium iodide (PI) staining . As a reference, DMSO treated cells were analyzed. Percentages of apoptotic (Yo-Pro 1+, PI-) and necrotic (PI+) cells were determined and displayed as the Mean  $\pm$  SD of at least three independent measurements. Significance of a treatment effect compared to the DMSO control was determined by one-way ANOVA or Kruskal-Wallis-Test and displayed as \*: P< 0.033, \*\*: P< 0.002, \*\*\*: P<0.001 (n  $\geq$  3).

Cell Death

Supplementary Figure S6

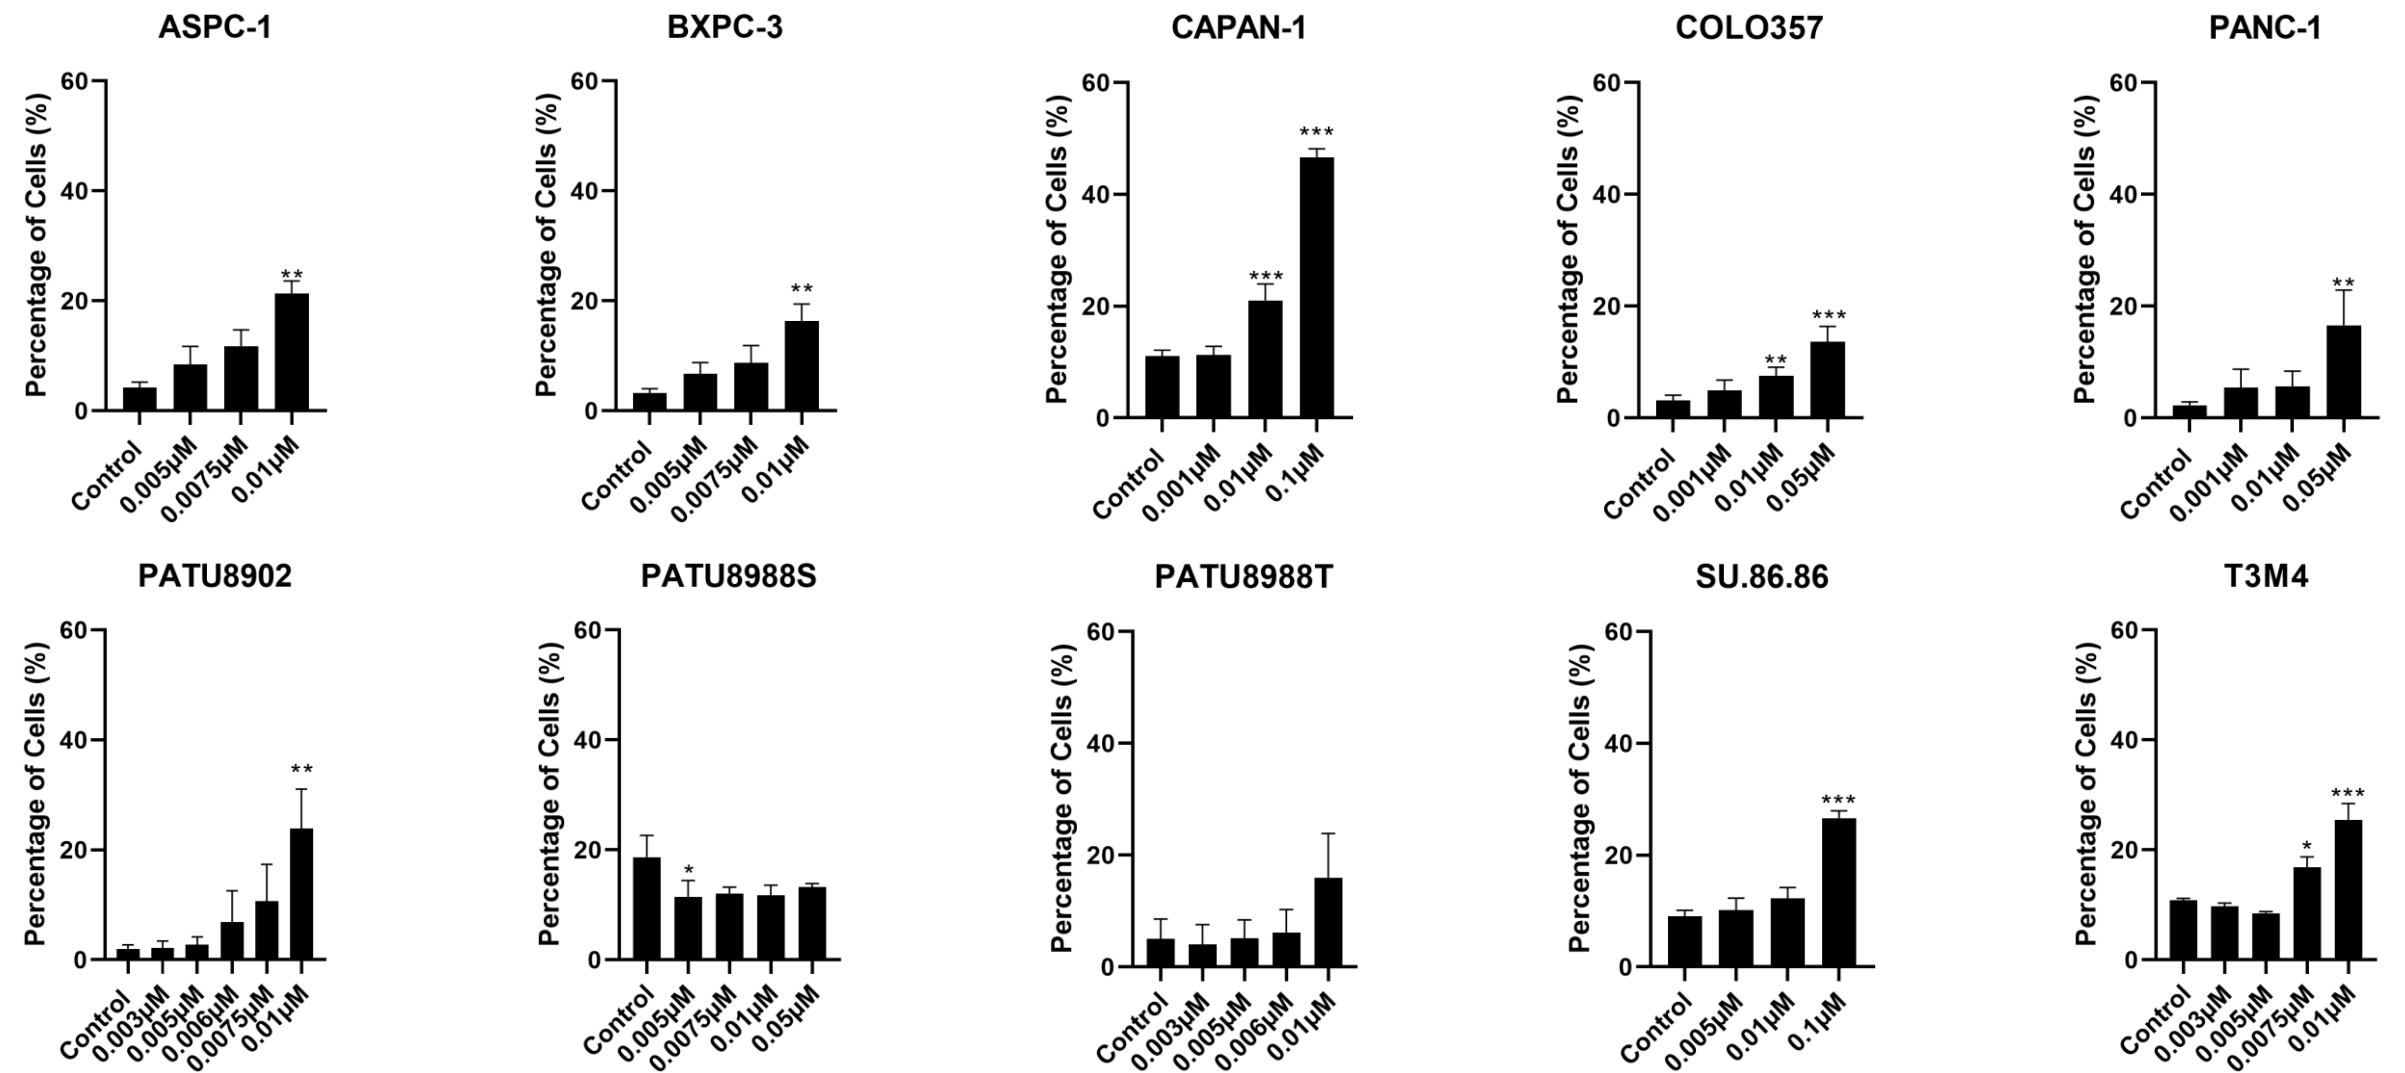

**Supplementary Figure S6.** Apoptosis/necrosis induction in 10 PDAC cell lines after 72h Dinaciclib exposure. Induction of apoptosis/necrosis was determined by flow cytometry after Yo-Pro 1 FITC and propidium iodide (PI) staining . As a reference, DMSO treated cells were analyzed. Percentages of apoptotic (Yo-Pro 1+, PI-) and necrotic (PI+) cells were determined and displayed as the Mean  $\pm$  SD of at least three independent measurements. Significance of a treatment effect compared to the DMSO control was determined by one-way ANOVA or Kruskal-Wallis-Test and displayed as \*: P< 0.033, \*\*: P< 0.002, \*\*\*: P<0.001 (n  $\geq$  3).

Cell Death

Supplementary  
Figure S7 –  
Apoptosis/Necrosis  
Dot Plot –  
Silmitasertib (1)

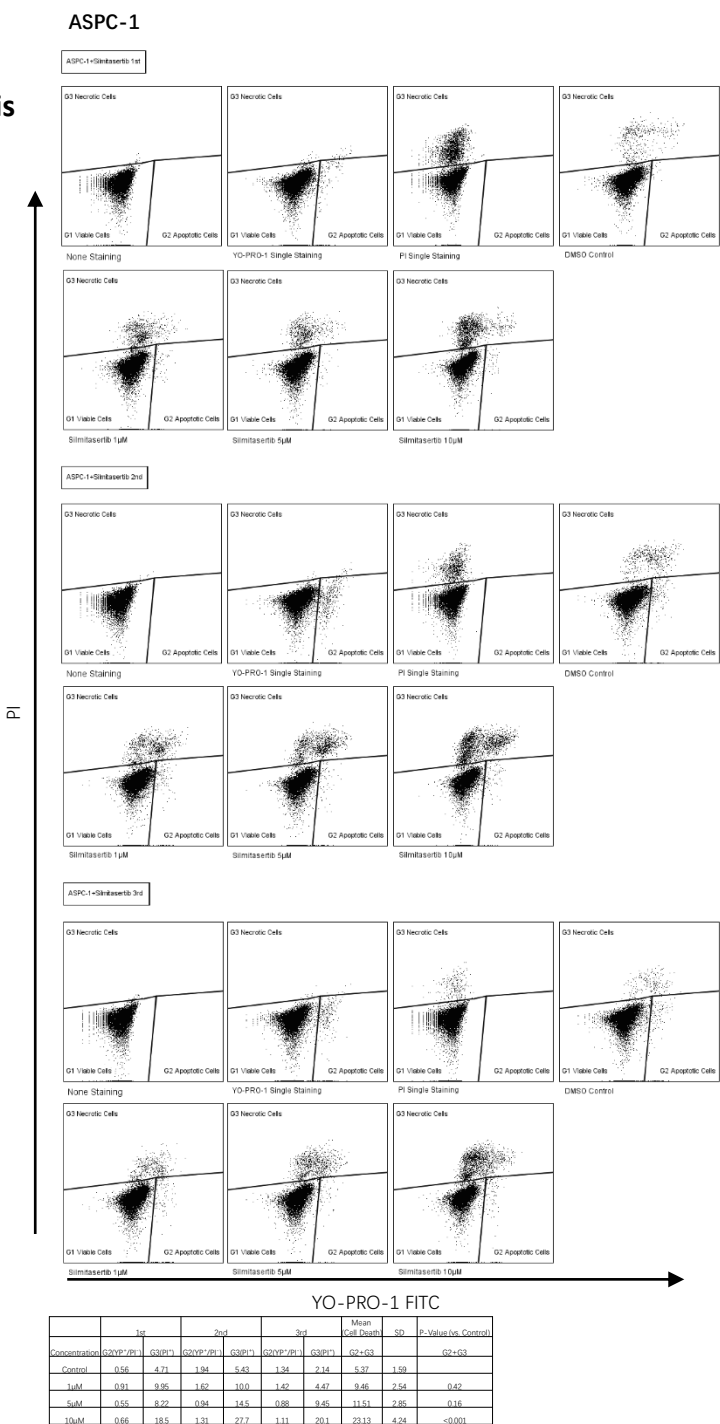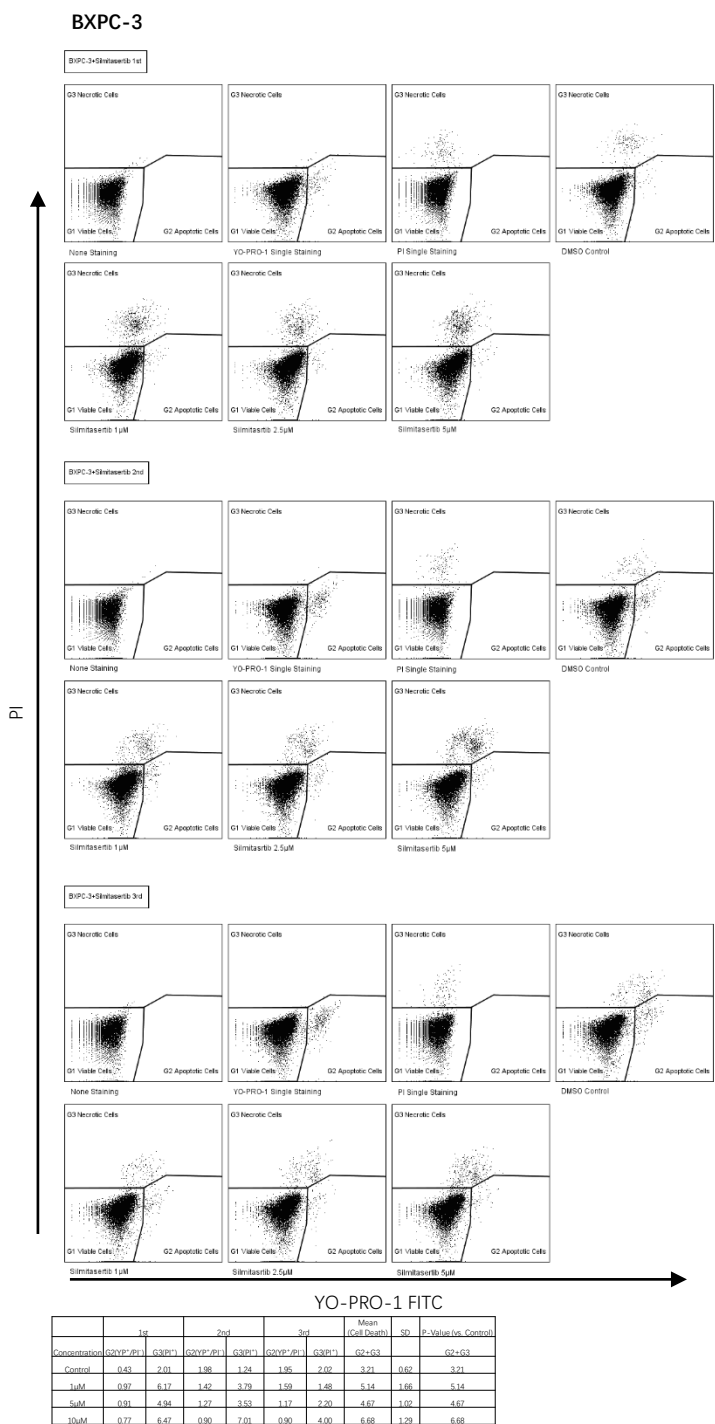

Supplementary Figure S7.  
Apoptosis/necrosis dot plot in 10  
PDAC cell lines after 72h  
Silmitasertib exposure. The cell  
population strategy is based on  
the manufacturer’s  
recommendation.  
G1: Viable cells; G2: Apoptotic  
cells; G3: Necrotic cells.  
Reference:  
<https://www.thermofisher.com/>  
(accessed on 14. Oct. 2021)

Supplementary  
Figure S7 –  
Apoptosis/Necrosis  
Dot Plot –  
Silmitasertib (2)

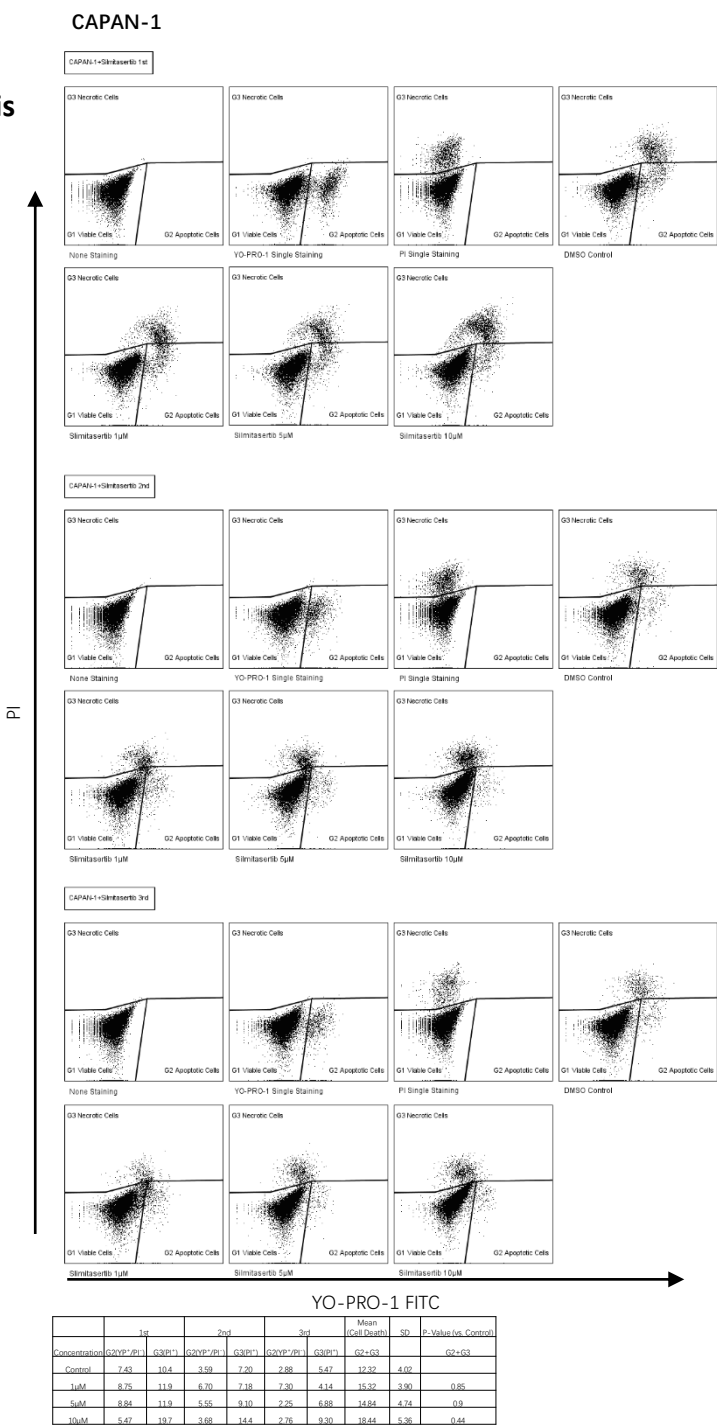



Supplementary  
Figure S7 –  
Apoptosis/Necrosis  
Dot Plot –  
Silmitasertib (3)

COLO357

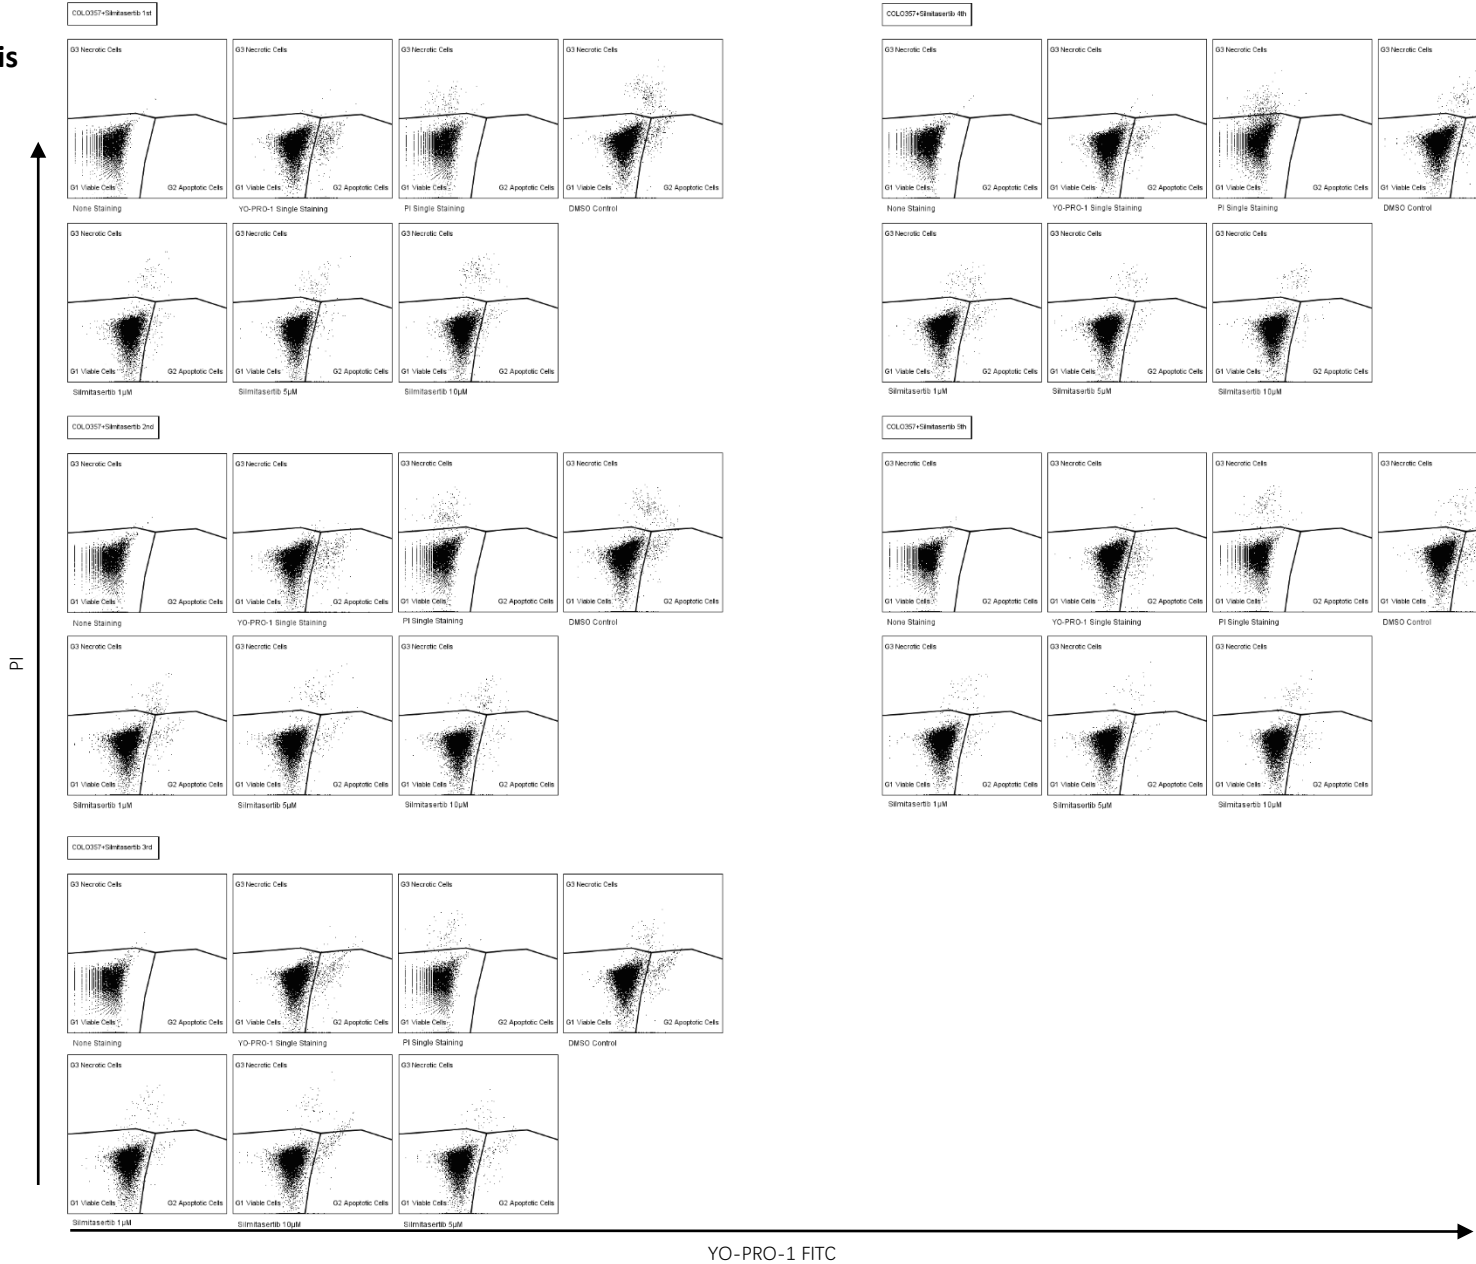

| Concentration | 1st     |        | 2nd     |        | 3rd     |        | 4th     |        | 5th     |        | Mean<br>(Cell Death) | SD   | P-Value (vs. Control) |
|---------------|---------|--------|---------|--------|---------|--------|---------|--------|---------|--------|----------------------|------|-----------------------|
|               | G2VP-PI | G3PI-1 |                      |      |                       |
| Control       | 2.91    | 2.23   | 2.38    | 1.81   | 3.01    | 0.73   | 1.41    | 0.90   | 1.65    | 0.88   | 3.58                 | 1.05 |                       |
| 1µM           | 1.21    | 0.68   | 1.72    | 1.09   | 0.71    | 0.60   | 1.31    | 0.94   | 0.80    | 0.56   | 1.92                 | 0.56 | 0.01                  |
| 5µM           | 1.41    | 0.83   | 1.10    | 0.83   | 1.13    | 0.48   | 0.59    | 0.63   | 0.52    | 0.38   | 1.58                 | 0.48 | 0.002                 |
| 10µM          | 1.32    | 1.40   | 0.86    | 0.97   | 1.89    | 0.61   | 0.53    | 0.82   | 1.67    | 0.69   | 2.15                 | 0.50 | 0.03                  |

**Supplementary  
Figure S7 –  
Apoptosis/Necrosis  
Dot Plot –  
Silmittasertib (4)**

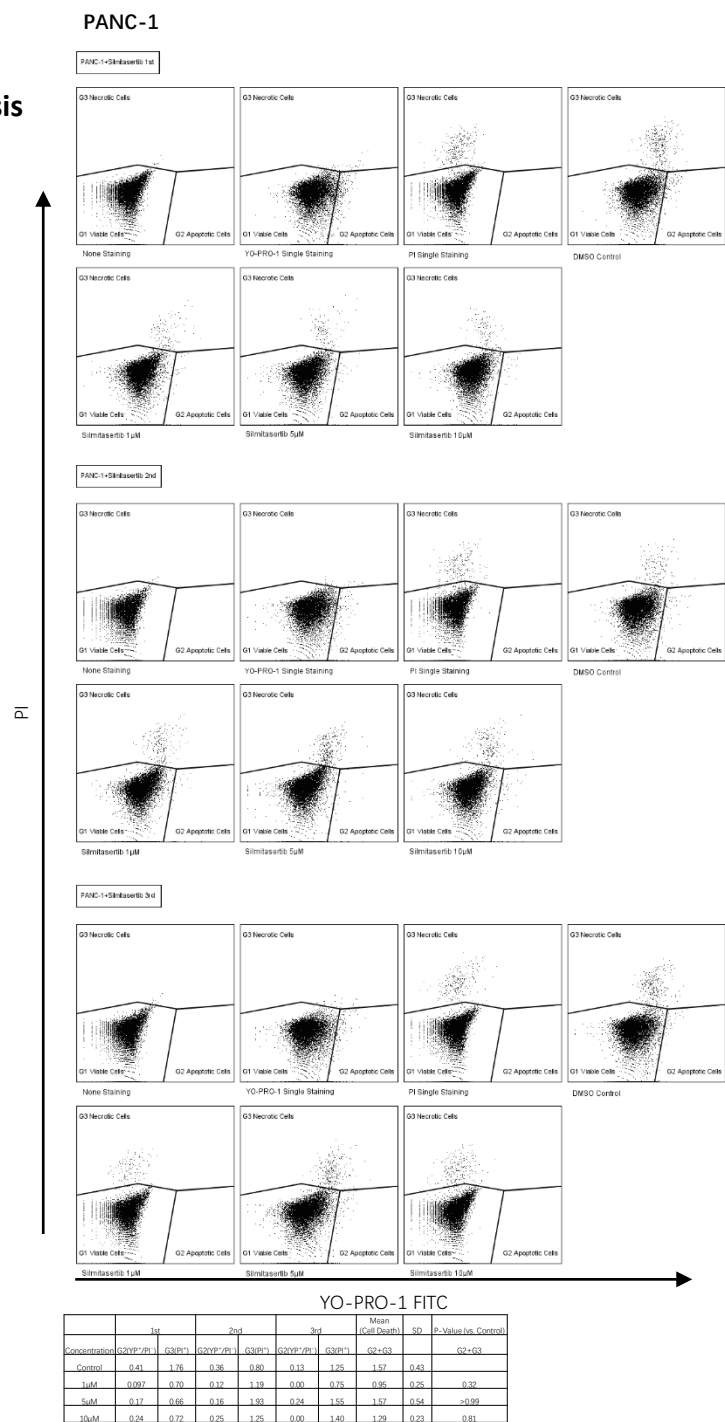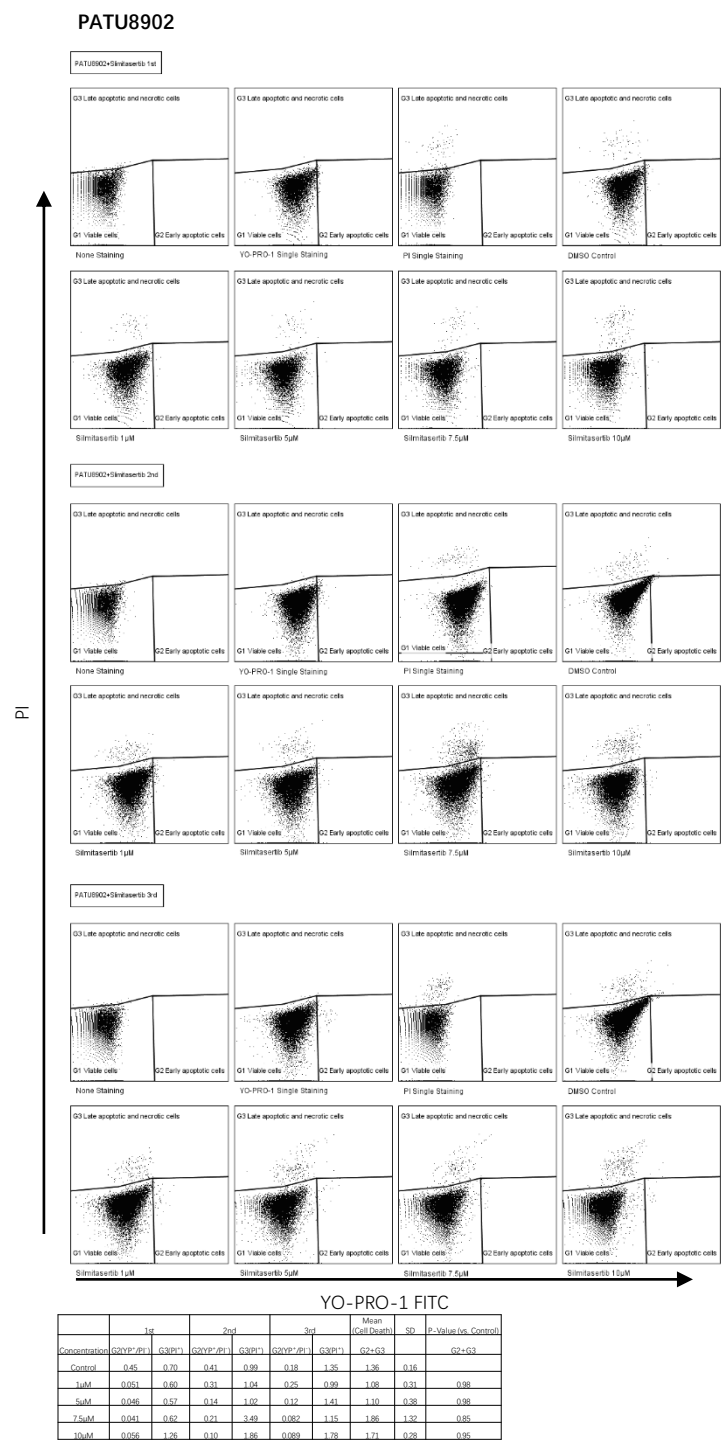

Supplementary  
Figure S7 –  
Apoptosis/Necrosis  
Dot Plot –  
Silmitasertib (5)

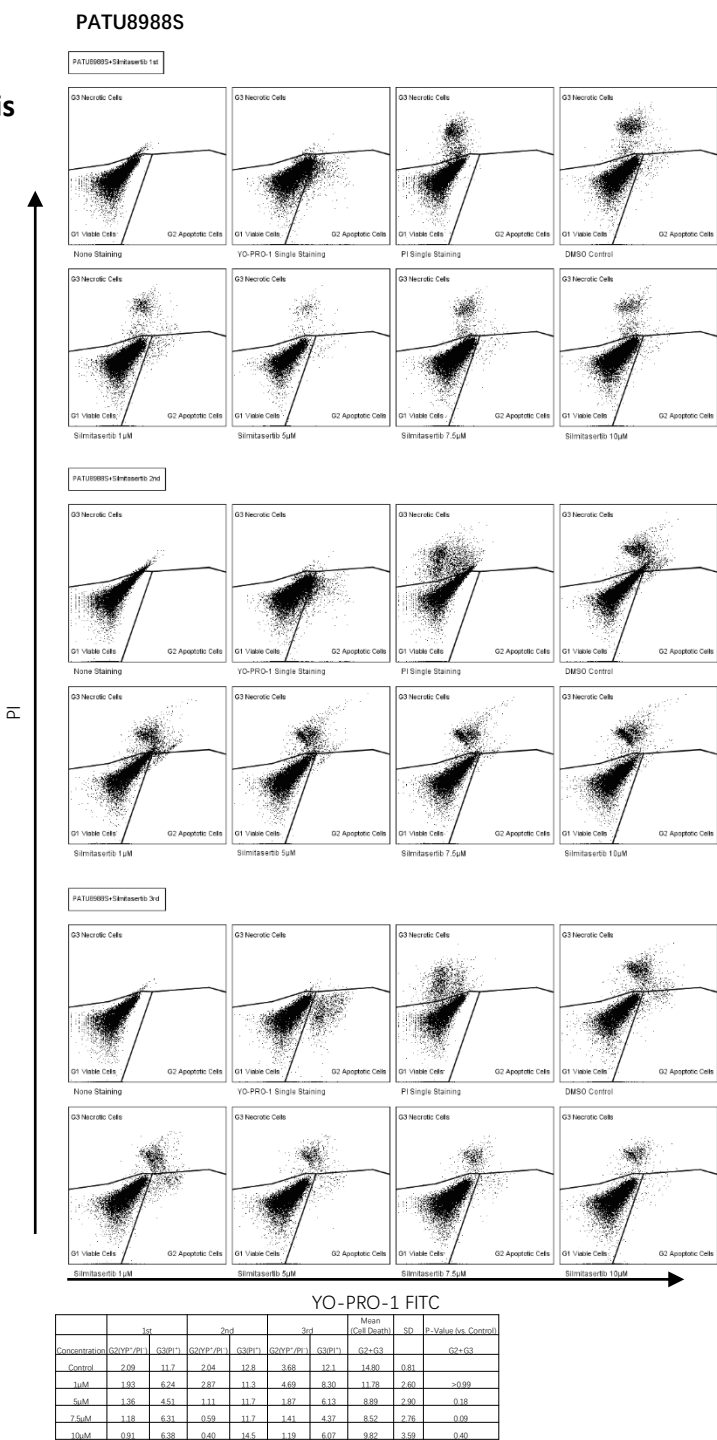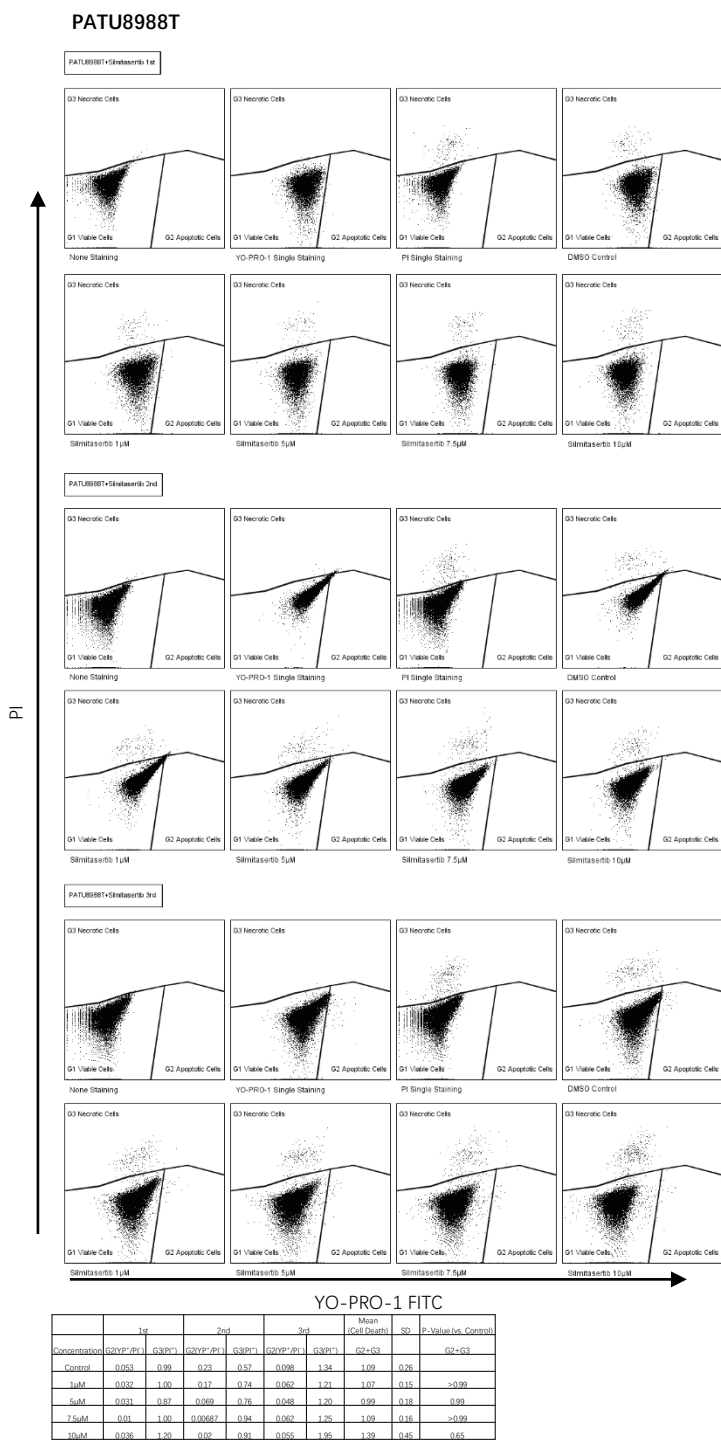

Supplementary  
Figure S7 –  
Apoptosis/Necrosis  
Dot Plot –  
Silmitasertib (6)

PI

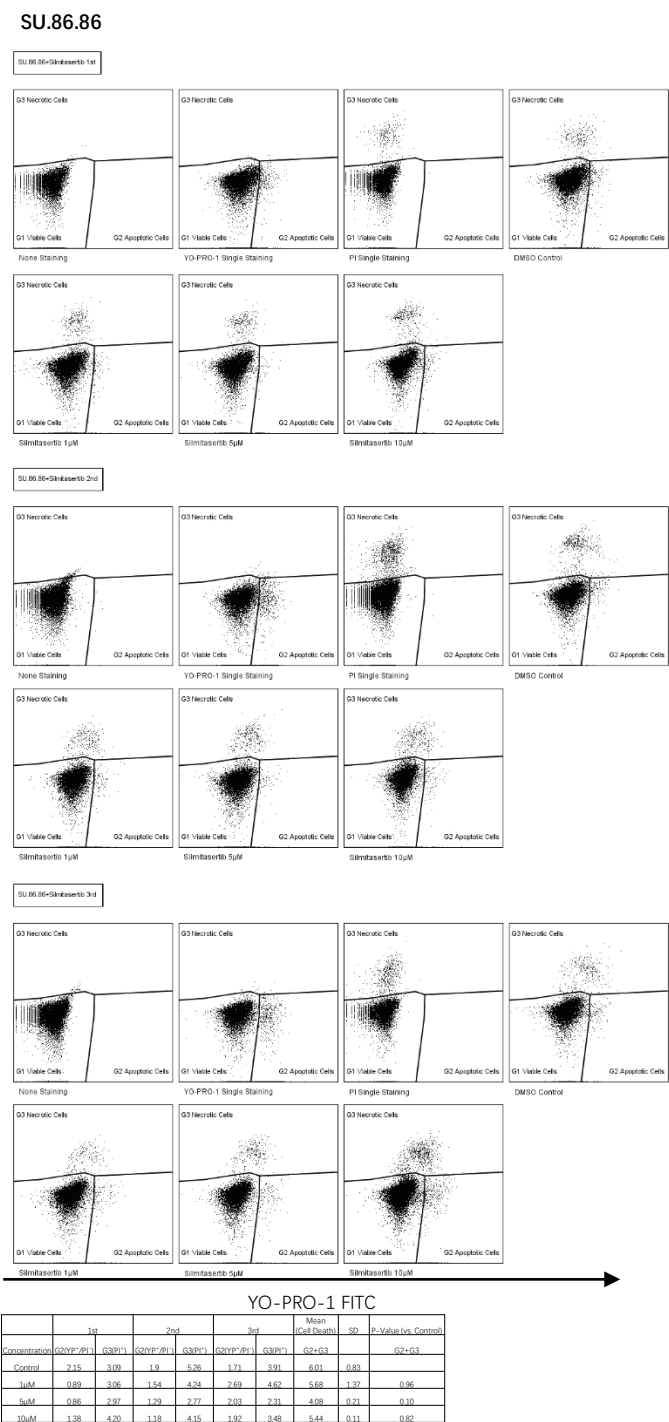

PI

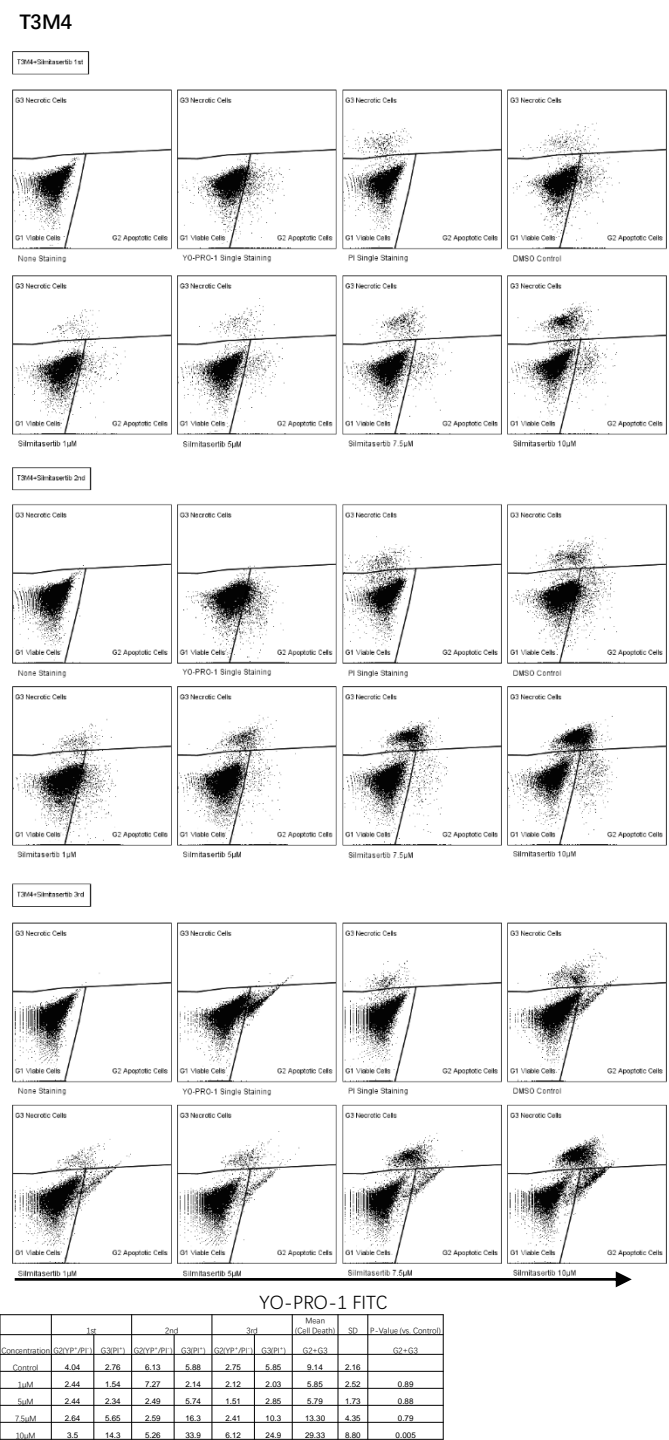

Supplementary  
Figure S8 –  
Apoptosis/Necrosis  
Dot Plot – Dinaciclib  
(1)

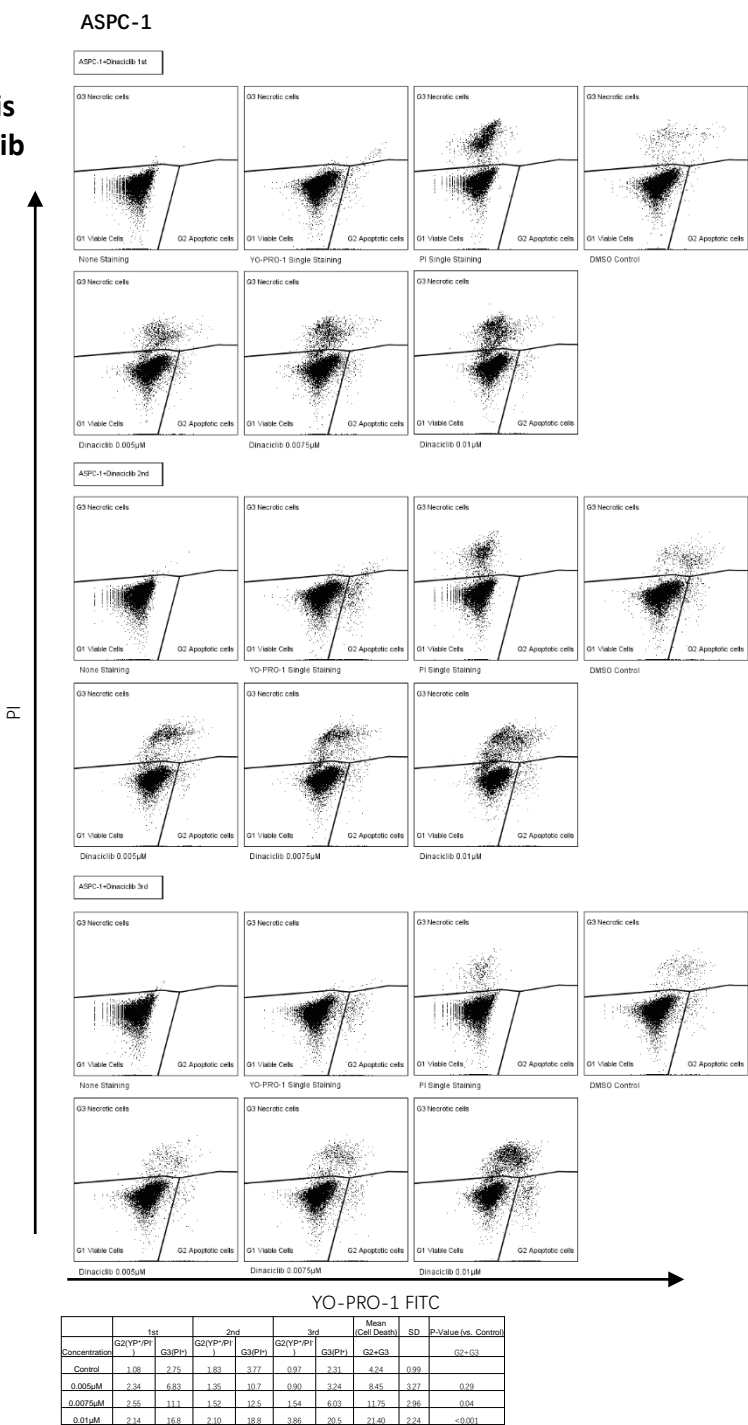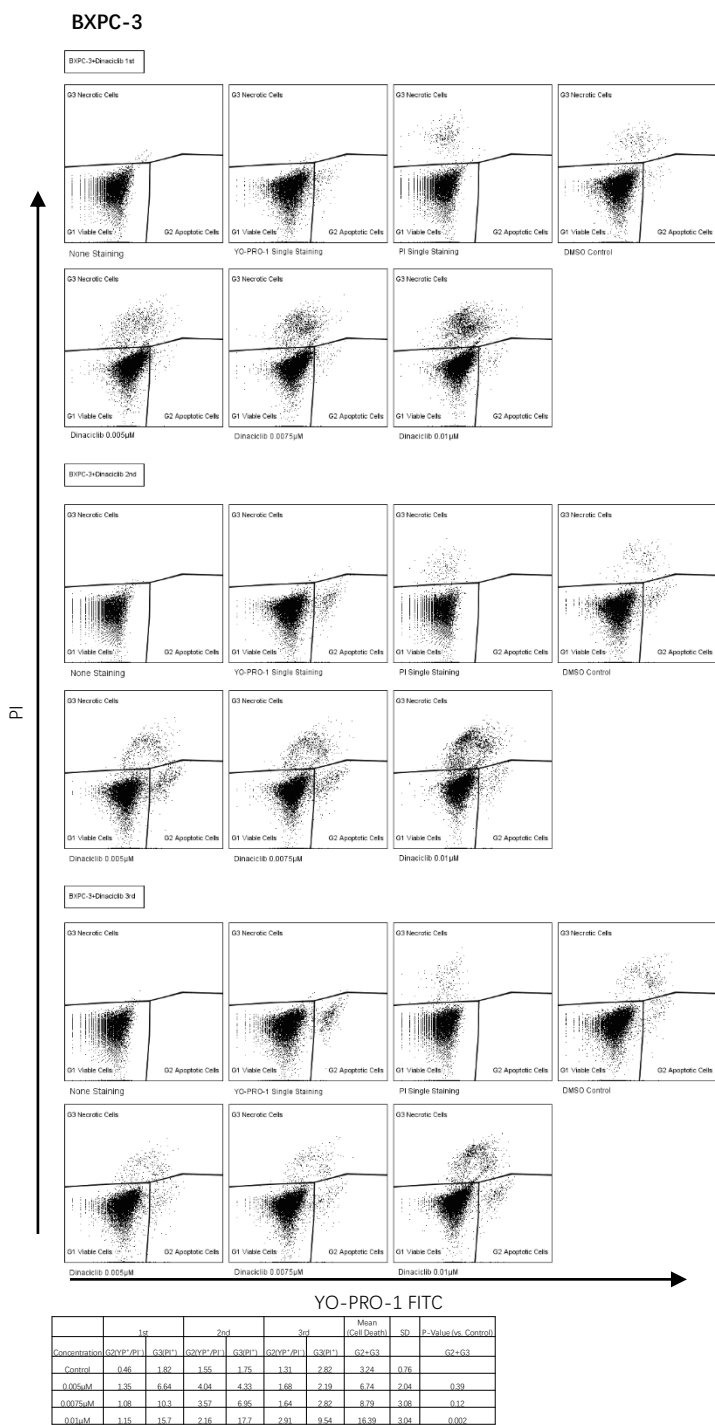

Supplementary Figure S8.  
Apoptosis/necrosis dot plot in 10  
PDAC cell lines after 72h  
Dinaciclib exposure. The cell  
population strategy is based on  
the manufacturer's  
recommendation.  
G1: Viable cells; G2: Apoptotic  
cells; G3: Necrotic cells.  
Reference:  
<https://www.thermofisher.com/>  
(accessed on 14. Oct. 2021)

Supplementary  
Figure S8 –  
Apoptosis/Necrosis  
Dot Plot – Dinaciclib  
(2)

PI

CAPAN-1

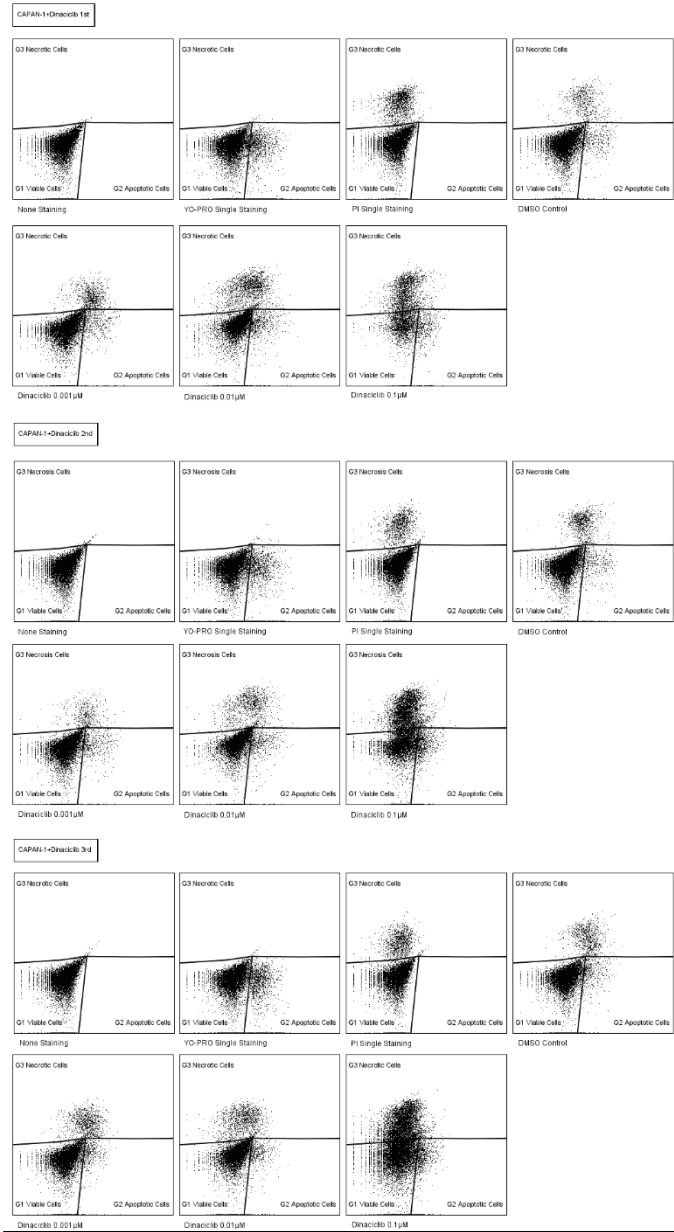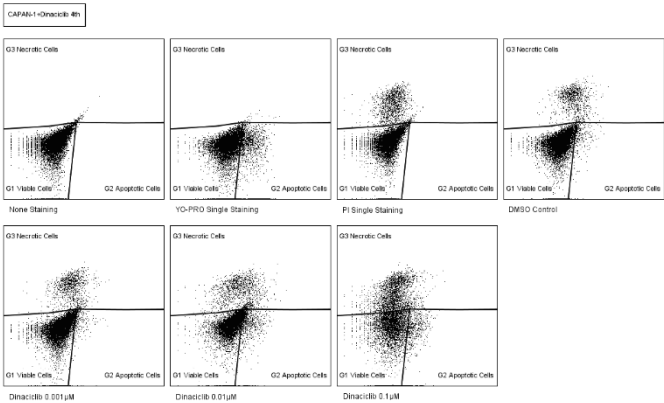

| Concentration | 1st     |        | 2nd     |        | 3rd     |        | 4th     |        | Mean (Cell Death) | SD   | P-Values (vs. Control) |
|---------------|---------|--------|---------|--------|---------|--------|---------|--------|-------------------|------|------------------------|
|               | G2Yp+PI | G3(Pi) | G2Yp+PI | G3(Pi) | G2Yp+PI | G3(Pi) | G2Yp+PI | G3(Pi) |                   |      |                        |
| Control       | 4.28    | 5.17   | 4.59    | 7.47   | 4.74    | 7.33   | 3.16    | 7.26   | 11.00             | 1.12 |                        |
| 0.001uM       | 5.20    | 6.33   | 5.23    | 3.75   | 5.23    | 8.22   | 3.14    | 7.87   | 11.24             | 1.59 | >0.99                  |
| 0.01uM        | 8.01    | 17.3   | 6.79    | 10.7   | 6.31    | 12.9   | 10.9    | 11.1   | 21.00             | 2.86 | <0.001                 |
| 0.1uM         | 7.71    | 37.2   | 7.09    | 41.8   | 8.09    | 37.6   | 12.3    | 34.9   | 46.67             | 1.52 | <0.001                 |

YO-PRO-1 FITC

Supplementary  
Figure S8 –  
Apoptosis/Necrosis  
Dot Plot – Dinaciclib  
(3)

PI

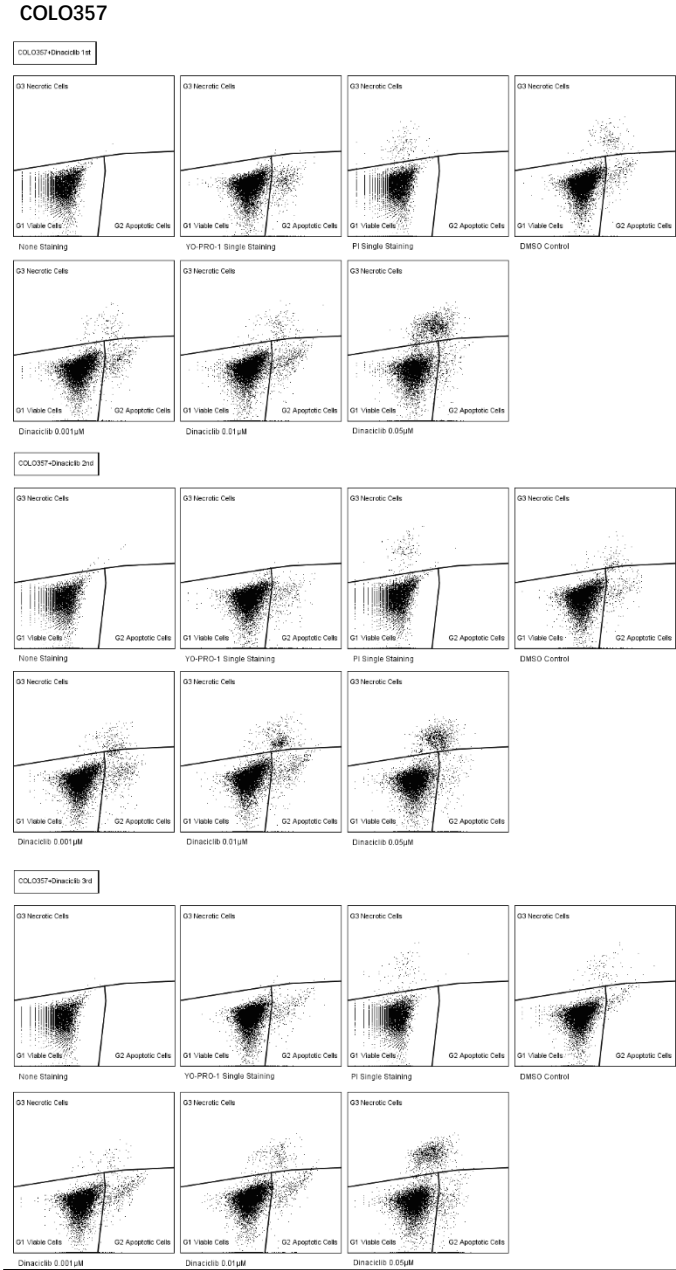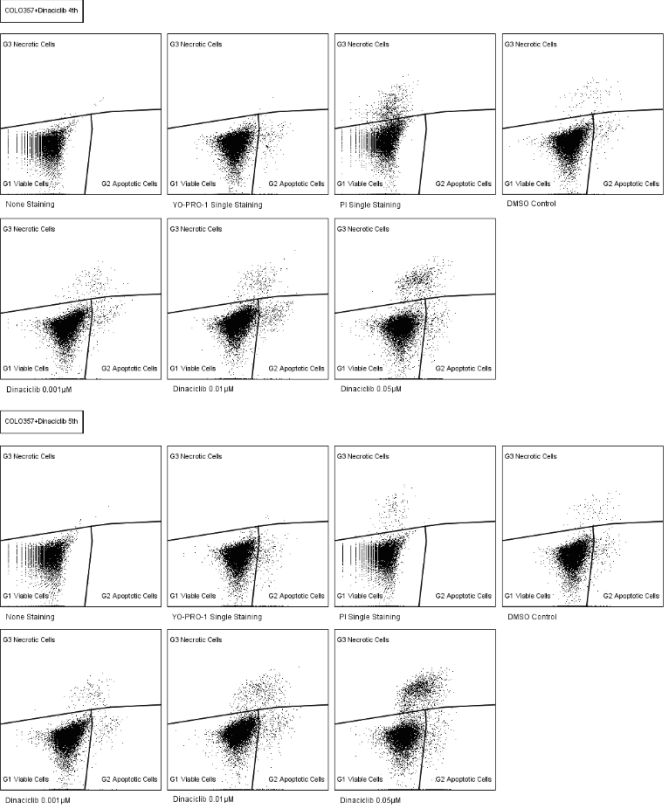

| Concentratio<br>n | 1st               |                   | 2nd               |                   | 3rd               |                   | 4th               |                   | 5th               |       | Mean<br>(Cell Death) | SD   | P-Value (vs. Control) |
|-------------------|-------------------|-------------------|-------------------|-------------------|-------------------|-------------------|-------------------|-------------------|-------------------|-------|----------------------|------|-----------------------|
|                   | G2YP+PI<br>(G3PI) | G2+G3 |                      |      |                       |
| Control           | 2.50              | 2.14              | 2.41              | 1.41              | 1.42              | 0.96              | 1.04              | 1.06              | 1.60              | 0.99  | 3.11                 | 0.97 |                       |
| 0.001µM           | 3.85              | 1.60              | 4.65              | 3.13              | 4.47              | 1.01              | 1.86              | 1.71              | 1.20              | 1.45  | 4.99                 | 1.77 | 0.37                  |
| 0.01µM            | 5.06              | 2.00              | 4.82              | 5.51              | 4.00              | 2.84              | 3.21              | 2.87              | 2.91              | 4.71  | 7.59                 | 1.46 | 0.01                  |
| 0.05µM            | 1.96              | 12.7              | 1.70              | 10.4              | 2.89              | 12.3              | 2.02              | 7.01              | 2.22              | 14.8  | 13.60                | 2.77 | <0.001                |

YO-PRO-1 FITC

Supplementary  
Figure S8 –  
Apoptosis/Necrosis  
Dot Plot – Dinaciclib  
(4)

PI

PANC-1

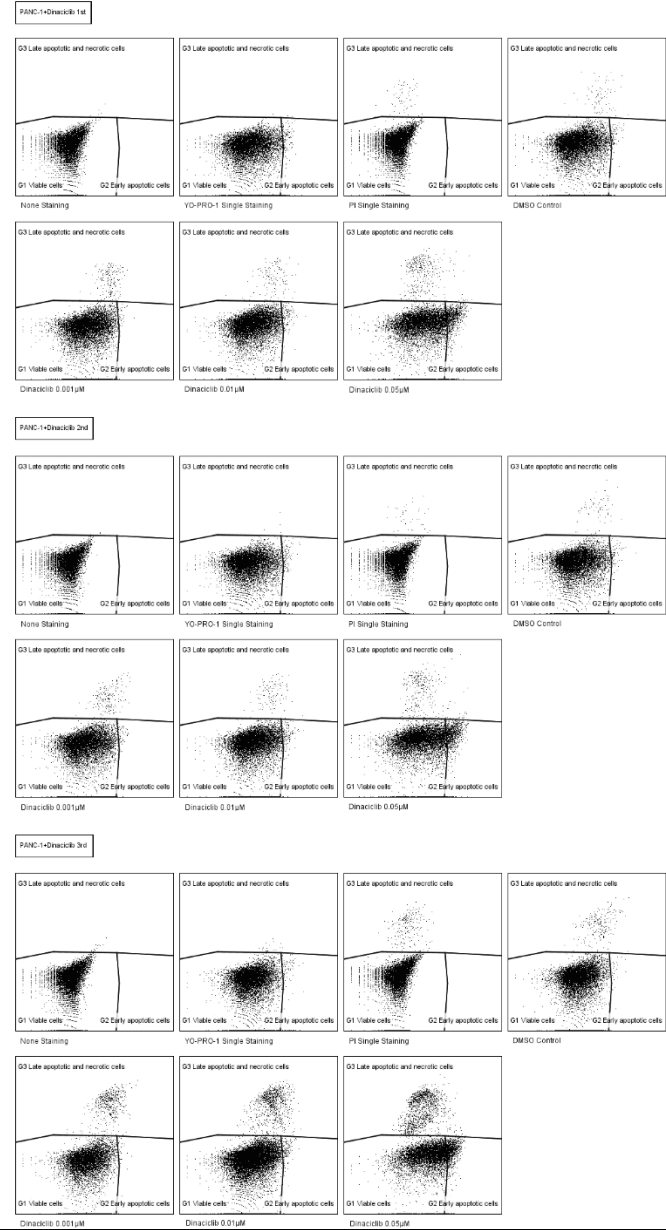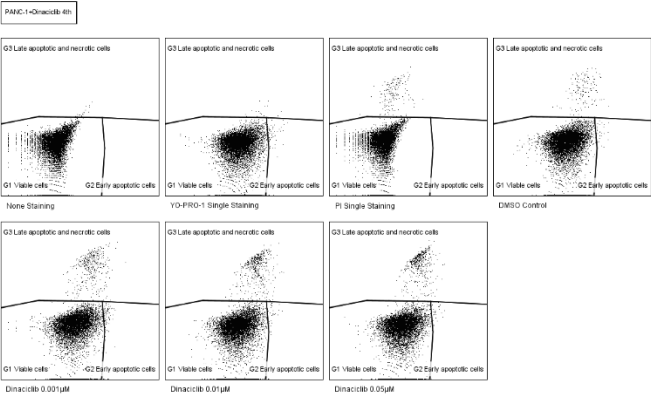

YO-PRO-1 FITC

| Concentration | 1st                 |        | 2nd                 |        | 3rd                 |        | 4th                 |        | Mean<br>(Cell Death) | SD   | P-Value (vs.<br>Control) |
|---------------|---------------------|--------|---------------------|--------|---------------------|--------|---------------------|--------|----------------------|------|--------------------------|
|               | G2(VP+PI)<br>G3(P+) | G3(P+) | G2(VP+PI)<br>G3(P+) | G3(P+) | G2(VP+PI)<br>G3(P+) | G3(P+) | G2(VP+PI)<br>G3(P+) | G3(P+) |                      |      |                          |
| Control       | 0.98                | 0.72   | 0.94                | 0.71   | 0.78                | 2.26   | 0.40                | 2.71   | 2.25                 | 0.61 |                          |
| 0.001µM       | 0.48                | 1.92   | 0.50                | 1.84   | 0.39                | 6.29   | 0.46                | 9.79   | 5.42                 | 3.30 | 0.63                     |
| 0.01µM        | 1.53                | 1.43   | 1.61                | 1.43   | 0.96                | 6.16   | 1.00                | 8.44   | 5.64                 | 2.78 | 0.58                     |
| 0.1µM         | 10.6                | 3.60   | 10.5                | 3.09   | 12.4                | 14.9   | 0.48                | 10.7   | 16.57                | 6.30 | 0.002                    |



Supplementary  
Figure S8 –  
Apoptosis/Necrosis  
Dot Plot – Dinaciclib  
(5)

PI

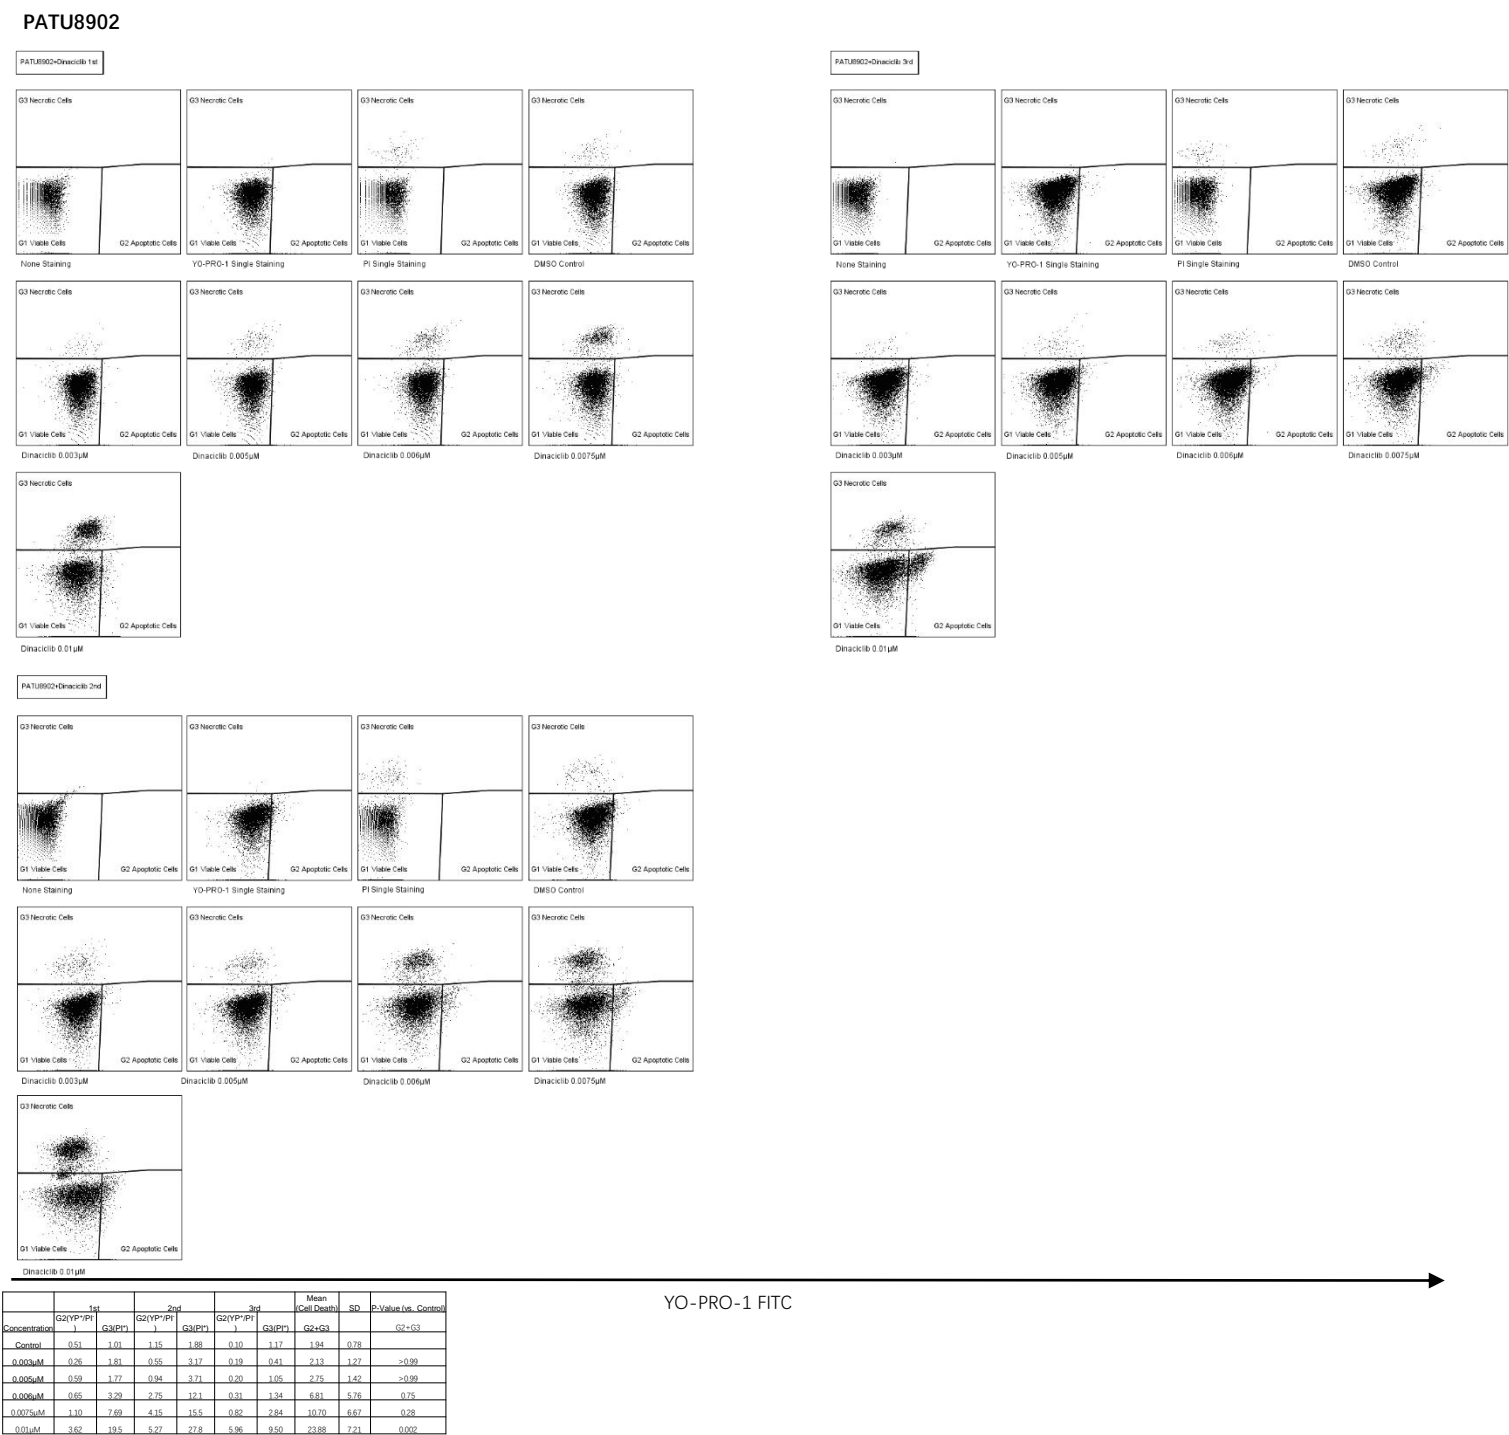

Supplementary  
Figure S8 –  
Apoptosis/Necrosis  
Dot Plot – Dinaciclib  
(6)

PI

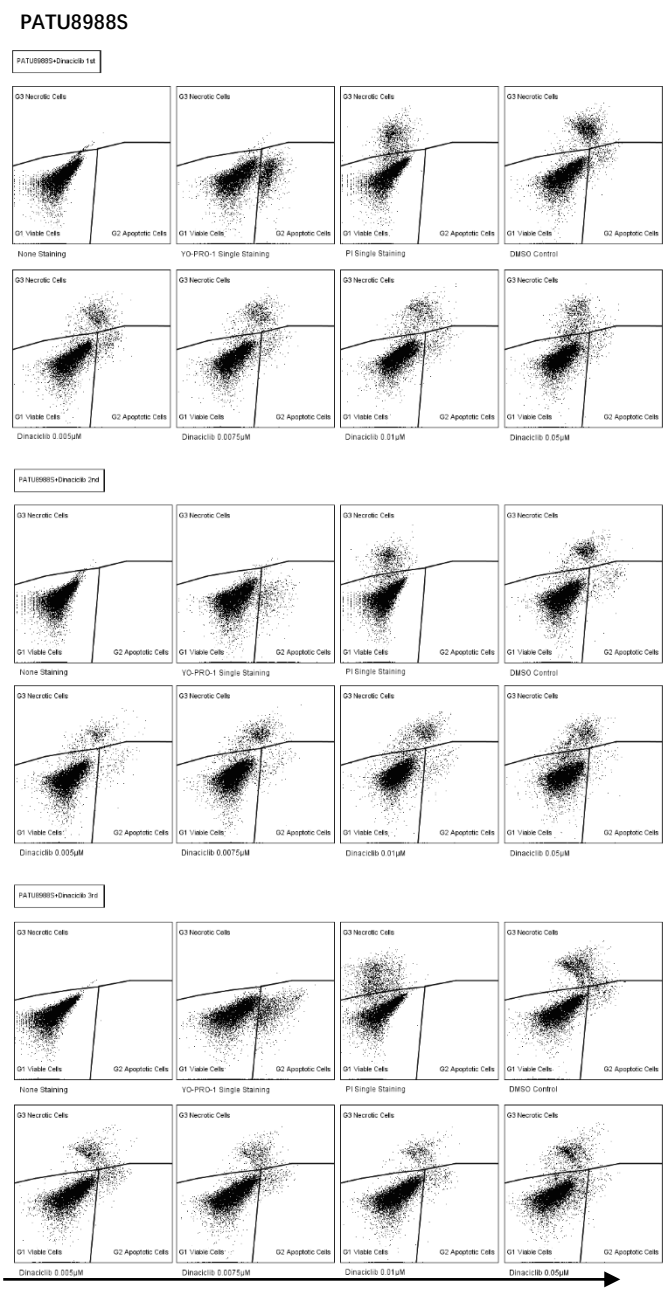

YO-PRO-1 FITC

|               | 1st       |        | 2nd       |        | 3rd       |        | Mean<br>(Cell Death) | SD   | P-Value (vs. Control) |
|---------------|-----------|--------|-----------|--------|-----------|--------|----------------------|------|-----------------------|
| Concentration | G3VP (PI) | G3(PI) | G3VP (PI) | G3(PI) | G3VP (PI) | G3(PI) | G2+G3                |      | G2+G3                 |
| Control       | 4.02      | 18.2   | 3.03      | 10.1   | 3.87      | 16.8   | 18.67                | 3.97 |                       |
| 0.005µM       | 4.23      | 9.84   | 2.00      | 5.21   | 3.60      | 9.40   | 11.43                | 3.01 | 0.04                  |
| 0.0075µM      | 3.63      | 9.95   | 2.02      | 9.82   | 3.16      | 7.65   | 12.08                | 1.14 | 0.07                  |
| 0.01µM        | 3.36      | 10.1   | 2.32      | 10.2   | 2.88      | 6.41   | 11.76                | 1.79 | 0.05                  |
| 0.05µM        | 2.33      | 10.9   | 1.41      | 11.0   | 1.80      | 12.4   | 13.21                | 0.65 | 0.14                  |

**Supplementary  
Figure S8 –  
Apoptosis/Necrosis  
Dot Plot – Dinaciclib  
(7)**

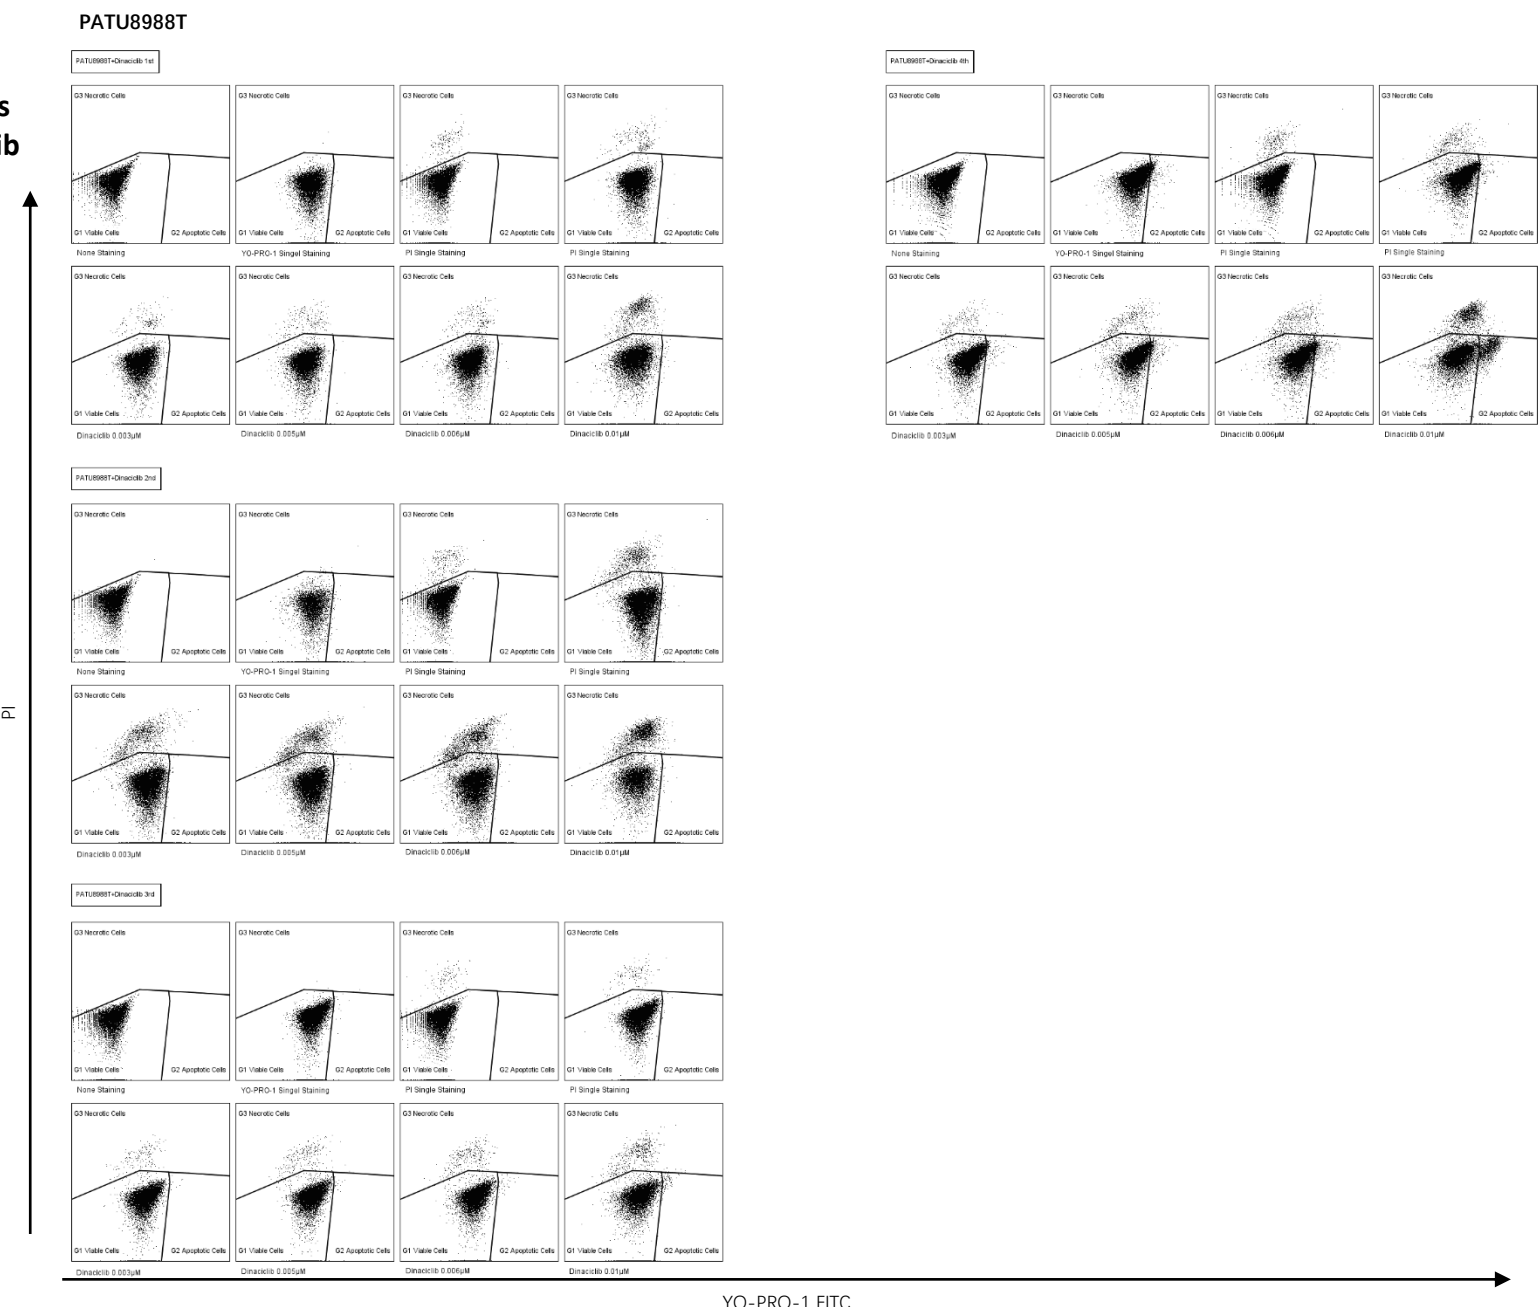

|                   | 1st           |            | 2nd           |            | 3rd           |            | 4th           |            | Mean<br>(Cell<br>Density) | SD   | P-Value (vs.<br>Control) |
|-------------------|---------------|------------|---------------|------------|---------------|------------|---------------|------------|---------------------------|------|--------------------------|
| Concentratio<br>n | G2(YP+P)<br>1 | G3(P)<br>1 | G2(YP+P)<br>1 | G3(P)<br>1 | G2(YP+P)<br>1 | G3(P)<br>1 | G2(YP+P)<br>1 | G3(P)<br>1 | G2+G3                     |      |                          |
| Control           | 0.38          | 7.6        | 6.36          | 4.65       | 4.52          | 1.65       | 0.26          | 3.81       | 5.03                      | 3.52 |                          |
| 0.003mM           | 1.24          | 1.61       | 4.03          | 6.08       | 0.28          | 1.65       | 0.32          | 2.18       | 4.07                      | 3.50 | <0.99                    |
| 0.005mM           | 0.25          | 2.19       | 3.41          | 7.34       | 0.51          | 2.45       | 0.49          | 3.85       | 5.12                      | 3.32 | <0.99                    |
| 0.005mM           | 0.35          | 2.3        | 3.72          | 9.30       | 0.56          | 2.80       | 0.91          | 4.76       | 6.18                      | 4.11 | <0.99                    |

Supplementary  
Figure S8 –  
Apoptosis/Necrosis  
Dot Plot – Dinaciclib  
(8)

PI

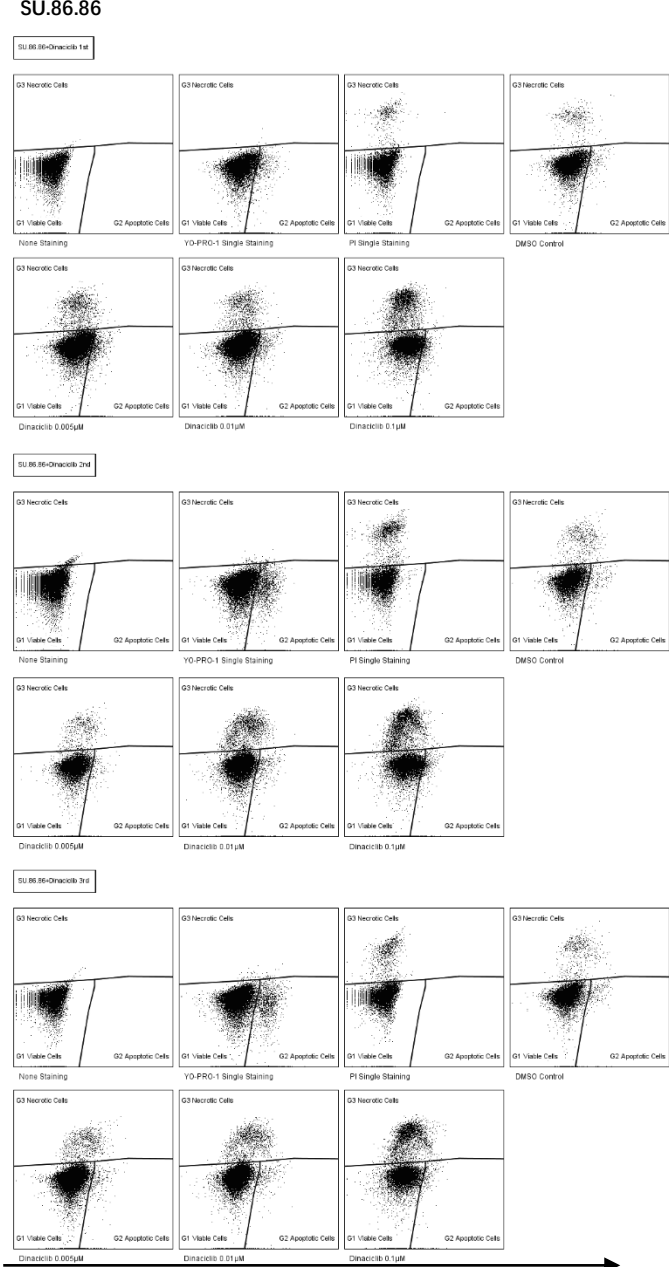

PI

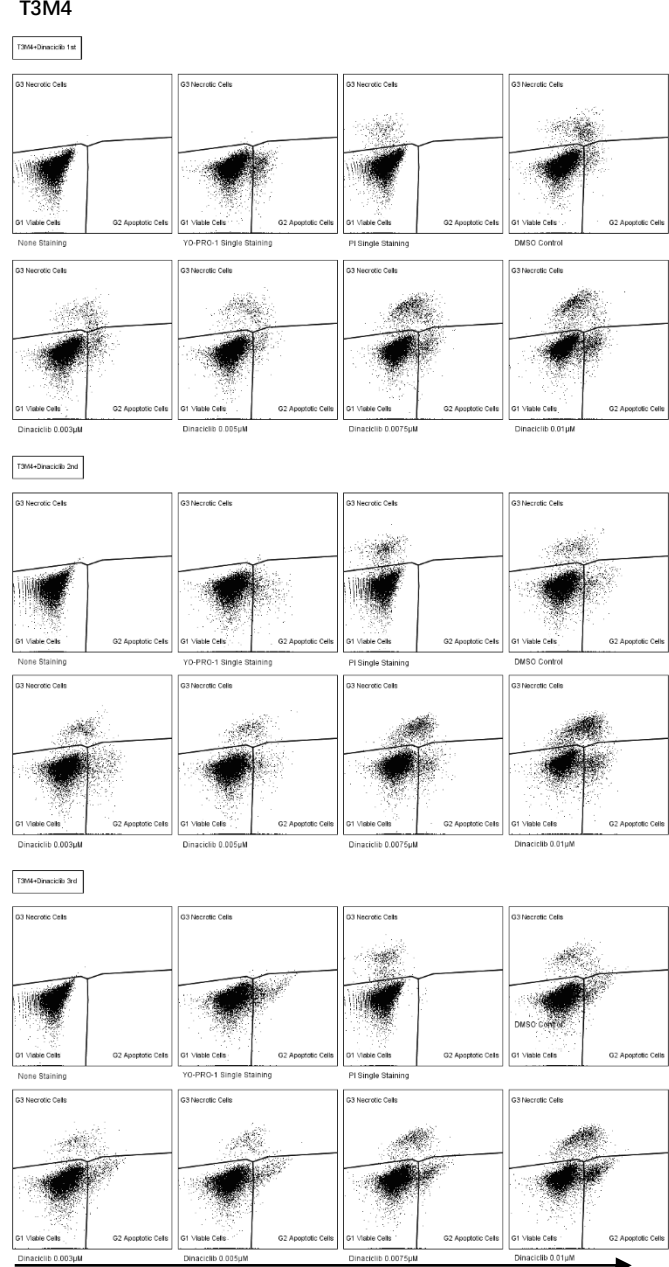

Supplement: s1 [file s1]
