# Supplementary material for: Inhibitory Response to CK II Inhibitor Silmitasertib and CDKs Inhibitor Dinaciclib Is Related to Genetic Differences in Pancreatic Ductal Adenocarcinoma Cell Lines
Source: MDPI journal article supplement (doi:10.3390/ijms23084409), 2022-04-16
Supplement: s1 [file s1]

Supplementary Table S1 - Cell Viability Sildenafil (to 100%Control)

| AsPc-1        |                    |         |         |         |         |      |    |                       |
|---------------|--------------------|---------|---------|---------|---------|------|----|-----------------------|
| Concentration | Proliferation      |         |         |         |         | Mean | SD | P-value (vs. Control) |
|               | 1st                | 2nd     | 3rd     |         |         |      |    |                       |
|               | Control            | 100.00% | 100.00% | 100.00% |         |      |    |                       |
|               | 1µM                | 123.02% | 109.68% | 130.43% |         |      |    |                       |
|               | 5µM                | 46.03%  | 41.94%  | 48.91%  |         |      |    |                       |
|               | 10µM               | 8.73%   | 18.28%  | 14.13%  |         |      |    |                       |
| Concentration | Metabolic activity |         |         |         |         | Mean | SD | P-value (vs. Control) |
|               | 1st                | 2nd     | 3rd     |         |         |      |    |                       |
|               | Control            | 100.00% | 100.00% | 100.00% |         |      |    |                       |
|               | 1µM                | 107.30% | 96.59%  | 87.61%  |         |      |    |                       |
|               | 5µM                | 97.27%  | 70.69%  | 64.49%  |         |      |    |                       |
|               | 10µM               | 33.40%  | 29.81%  | 46.14%  |         |      |    |                       |
| Concentration | Biomass            |         |         |         |         | Mean | SD | P-value (vs. Control) |
|               | 1st                | 2nd     | 3rd     |         |         |      |    |                       |
|               | Control            | 100.00% | 100.00% | 100.00% |         |      |    |                       |
|               | 1µM                | 60.52%  | 81.24%  | 66.02%  |         |      |    |                       |
|               | 5µM                | 33.51%  | 34.12%  | 17.02%  |         |      |    |                       |
|               | 10µM               | 9.05%   | 5.08%   | 11.51%  |         |      |    |                       |
|               |                    |         |         |         |         |      |    |                       |
| BxPc-3        |                    |         |         |         |         |      |    |                       |
| Concentration | Proliferation      |         |         |         |         | Mean | SD | P-value (vs. Control) |
|               | 1st                | 2nd     | 3rd     | 4th     | 5th     |      |    |                       |
|               | Control            | 100.00% | 100.00% | 100.00% | 100.00% |      |    |                       |
|               | 1µM                | 92.51%  | 77.69%  | 81.30%  | 67.61%  |      |    |                       |
|               | 2.5µM              |         |         | 42.37%  | 46.95%  |      |    |                       |
|               | 5µM                | 18.89%  | 14.74%  | 16.41%  | 14.55%  |      |    |                       |
|               | 10µM               | 2.28%   | 6.77%   | 3.82%   | 5.63%   |      |    |                       |
| Concentration | Metabolic activity |         |         |         |         | Mean | SD | P-value (vs. Control) |
|               | 1st                | 2nd     | 3rd     | 4th     | 5th     |      |    |                       |
|               | Control            | 100.00% | 100.00% | 100.00% | 100.00% |      |    |                       |
|               | 1µM                | 105.64% | 97.94%  | 107.29% | 108.76% |      |    |                       |
|               | 2.5µM              |         |         | 97.84%  | 109.17% |      |    |                       |
|               | 5µM                | 74.78%  | 52.19%  | 52.91%  | 82.90%  |      |    |                       |
|               | 10µM               | 34.82%  | 21.27%  | 20.03%  | 29.97%  |      |    |                       |
| Concentration | Biomass            |         |         |         |         | Mean | SD | P-value (vs. Control) |
|               | 1st                | 2nd     | 3rd     | 4th     | 5th     |      |    |                       |
|               | Control            | 100.00% | 100.00% | 100.00% | 100.00% |      |    |                       |
|               | 1µM                | 57.69%  | 56.46%  | 61.48%  | 69.95%  |      |    |                       |
|               | 2.5µM              |         |         | 36.14%  | 44.12%  |      |    |                       |
|               | 5µM                | 21.16%  | 9.15%   | 13.54%  | 22.89%  |      |    |                       |
|               | 10µM               | 5.89%   | 0.88%   | 6.04%   | 9.35%   |      |    |                       |
|               |                    |         |         |         |         |      |    |                       |
| Capan-1       |                    |         |         |         |         |      |    |                       |
| Concentration | Proliferation      |         |         |         |         | Mean | SD | P-value (vs. Control) |
|               | 1st                | 2nd     | 3rd     |         |         |      |    |                       |
|               | Control            | 100.00% | 100.00% | 100.00% |         |      |    |                       |
|               | 1µM                | 84.72%  | 83.33%  | 82.35%  |         |      |    |                       |
|               | 5µM                | 75.00%  | 83.67%  | 72.94%  |         |      |    |                       |
|               | 10µM               | 36.11%  | 11.00%  | 39.12%  |         |      |    |                       |
| Concentration | Metabolic activity |         |         |         |         | Mean | SD | P-value (vs. Control) |
|               | 1st                | 2nd     | 3rd     |         |         |      |    |                       |
|               | Control            | 100.00% | 100.00% | 100.00% |         |      |    |                       |
|               | 1µM                | 91.96%  | 107.98% | 90.58%  |         |      |    |                       |
|               | 5µM                | 88.29%  | 84.11%  | 108.45% |         |      |    |                       |
|               | 10µM               | 37.10%  | 52.92%  | 58.55%  |         |      |    |                       |
| Concentration | Biomass            |         |         |         |         | Mean | SD | P-value (vs. Control) |
|               | 1st                | 2nd     | 3rd     |         |         |      |    |                       |
|               | Control            | 100.00% | 100.00% | 100.00% |         |      |    |                       |
|               | 1µM                | 86.16%  | 69.46%  | 103.43% |         |      |    |                       |
|               | 5µM                | 50.96%  | 47.88%  | 70.15%  |         |      |    |                       |
|               | 10µM               | 22.84%  | 19.29%  | 36.38%  |         |      |    |                       |
|               |                    |         |         |         |         |      |    |                       |
| Colo357       |                    |         |         |         |         |      |    |                       |
| Concentration | Proliferation      |         |         |         |         | Mean | SD | P-value (vs. Control) |
|               | 1st                | 2nd     | 3rd     | 4th     | 5th     |      |    |                       |
|               | Control            | 100.00% | 100.00% | 100.00% | 100.00% |      |    |                       |
|               | 1µM                | 117.56% | 119.66% | 107.72% | 94.35%  |      |    |                       |
|               | 5µM                | 83.59%  | 98.31%  | 92.28%  | 91.13%  |      |    |                       |
|               | 10µM               | 77.10%  | 62.36%  | 76.06%  | 73.39%  |      |    |                       |
| Concentration | Metabolic activity |         |         |         |         | Mean | SD | P-value (vs. Control) |
|               | 1st                | 2nd     | 3rd     | 4th     | 5th     |      |    |                       |
|               | Control            | 100.00% | 100.00% | 100.00% | 100.00% |      |    |                       |
|               | 1µM                | 115.06% | 100.47% | 98.38%  | 108.54% |      |    |                       |
|               | 5µM                |         | 81.90%  | 101.10% | 112.36% |      |    |                       |
|               | 10µM               | 96.96%  | 64.77%  | 98.50%  | 89.06%  |      |    |                       |
| Concentration | Biomass            |         |         |         |         | Mean | SD | P-value (vs. Control) |
|               | 1st                | 2nd     | 3rd     |         |         |      |    |                       |
|               | Control            | 100.00% | 100.00% | 100.00% |         |      |    |                       |
|               | 1µM                | 99.45%  | 75.34%  | 89.23%  |         |      |    |                       |
|               | 5µM                | 98.20%  | 74.78%  | 69.11%  |         |      |    |                       |
|               | 10µM               | 59.55%  | 49.92%  | 58.24%  |         |      |    |                       |

Supplementary Table S1 - Cell Viability Silmitasertib (to 100%Control)

| Panc-1        |                    |         |         |         |         |      |    |                       |
|---------------|--------------------|---------|---------|---------|---------|------|----|-----------------------|
| Concentration | Proliferation      |         |         |         |         | Mean | SD | P-value (vs. Control) |
|               | 1st                | 2nd     | 3rd     |         |         |      |    |                       |
|               | Control            | 100.00% | 100.00% | 100.00% |         |      |    |                       |
|               | 1µM                | 101.25% | 126.09% | 102.10% |         |      |    |                       |
|               | 5µM                | 98.75%  | 91.30%  | 79.00%  |         |      |    |                       |
|               | 10µM               | 97.50%  | 38.04%  | 63.50%  |         |      |    |                       |
| Concentration | Metabolic activity |         |         |         |         | Mean | SD | P-value (vs. Control) |
|               | 1st                | 2nd     | 3rd     |         |         |      |    |                       |
|               | Control            | 100.00% | 100.00% | 100.00% |         |      |    |                       |
|               | 1µM                | 101.00% | 96.52%  | 93.03%  |         |      |    |                       |
|               | 5µM                | 82.96%  | 88.07%  | 80.29%  |         |      |    |                       |
|               | 10µM               | 69.87%  | 66.91%  | 68.56%  |         |      |    |                       |
| Concentration | Biomass            |         |         |         |         | Mean | SD | P-value (vs. Control) |
|               | 1st                | 2nd     | 3rd     |         |         |      |    |                       |
|               | Control            | 100.00% | 100.00% | 100.00% |         |      |    |                       |
|               | 1µM                | 101.80% | 84.02%  | 104.34% |         |      |    |                       |
|               | 5µM                | 64.30%  | 72.88%  | 86.97%  |         |      |    |                       |
|               | 10µM               | 39.21%  | 38.47%  | 49.95%  |         |      |    |                       |
|               |                    |         |         |         |         |      |    |                       |
| PaTu8902      |                    |         |         |         |         |      |    |                       |
| Concentration | Proliferation      |         |         |         |         | Mean | SD | P-value (vs. Control) |
|               | 1st                | 2nd     | 3rd     | 4th     | 5th     |      |    |                       |
|               | Control            | 100.00% | 100.00% | 100.00% | 100.00% |      |    |                       |
|               | 1µM                | 89.89%  | 98.00%  | 90.38%  | 96.96%  |      |    |                       |
|               | 5µM                | 78.65%  | 87.00%  | 75.00%  | 72.37%  |      |    |                       |
|               | 10µM               | 65.17%  | 54.00%  | 63.46%  | 59.87%  |      |    |                       |
| Concentration | Metabolic activity |         |         |         |         | Mean | SD | P-value (vs. Control) |
|               | 1st                | 2nd     | 3rd     | 4th     | 5th     |      |    |                       |
|               | Control            | 100.00% | 100.00% | 100.00% | 100.00% |      |    |                       |
|               | 1µM                | 94.73%  | 98.86%  | 88.65%  | 94.21%  |      |    |                       |
|               | 5µM                | 75.65%  | 87.50%  | 70.59%  | 92.68%  |      |    |                       |
|               | 10µM               | 85.61%  | 42.71%  | 26.71%  | 62.89%  |      |    |                       |
| Concentration | Biomass            |         |         |         |         | Mean | SD | P-value (vs. Control) |
|               | 1st                | 2nd     | 3rd     | 4th     |         |      |    |                       |
|               | Control            | 100.00% | 100.00% | 100.00% | 100.00% |      |    |                       |
|               | 1µM                | 94.42%  | 98.41%  | 98.48%  | 87.80%  |      |    |                       |
|               | 5µM                | 80.61%  | 94.43%  | 71.55%  | 59.09%  |      |    |                       |
|               | 10µM               | 71.85%  | 84.57%  | 26.84%  | 47.32%  |      |    |                       |
|               |                    |         |         |         |         |      |    |                       |
| PaTu8988S     |                    |         |         |         |         |      |    |                       |
| Concentration | Proliferation      |         |         |         |         | Mean | SD | P-value (vs. Control) |
|               | 1st                | 2nd     | 3rd     | 4th     |         |      |    |                       |
|               | Control            | 100.00% | 100.00% | 100.00% | 100.00% |      |    |                       |
|               | 1µM                | 130.51% | 121.36% | 108.70% | 104.65% |      |    |                       |
|               | 5µM                | 83.05%  | 76.70%  | 75.00%  | 84.88%  |      |    |                       |
|               | 10µM               | 71.19%  | 66.02%  | 67.39%  | 76.74%  |      |    |                       |
| Concentration | Metabolic activity |         |         |         |         | Mean | SD | P-value (vs. Control) |
|               | 1st                | 2nd     | 3rd     | 4th     |         |      |    |                       |
|               | Control            | 100.00% | 100.00% | 100.00% | 100.00% |      |    |                       |
|               | 1µM                | 95.43%  | 119.78% | 119.56% | 98.74%  |      |    |                       |
|               | 5µM                | 77.93%  | 91.42%  | 128.89% | 106.14% |      |    |                       |
|               | 10µM               | 74.04%  | 88.90%  | 101.14% | 97.78%  |      |    |                       |
| Concentration | Biomass            |         |         |         |         | Mean | SD | P-value (vs. Control) |
|               | 1st                | 2nd     | 3rd     | 4th     |         |      |    |                       |
|               | Control            | 100.00% | 100.00% | 100.00% | 100.00% |      |    |                       |
|               | 1µM                | 89.29%  | 89.36%  | 94.85%  | 97.36%  |      |    |                       |
|               | 5µM                | 78.42%  | 68.05%  | 85.24%  | 83.27%  |      |    |                       |
|               | 10µM               | 56.41%  | 61.34%  | 44.47%  | 52.74%  |      |    |                       |
|               |                    |         |         |         |         |      |    |                       |
| PaTu8988T     |                    |         |         |         |         |      |    |                       |
| Concentration | Proliferation      |         |         |         |         | Mean | SD | P-value (vs. Control) |
|               | 1st                | 2nd     | 3rd     | 4th     |         |      |    |                       |
|               | Control            | 100.00% | 100.00% | 100.00% | 100.00% |      |    |                       |
|               | 1µM                | 104.90% | 92.66%  | 95.04%  | 94.01%  |      |    |                       |
|               | 5µM                | 78.88%  | 82.04%  | 76.86%  | 79.21%  |      |    |                       |
|               | 10µM               | 56.50%  | 61.75%  | 34.73%  | 44.63%  |      |    |                       |
| Concentration | Metabolic activity |         |         |         |         | Mean | SD | P-value (vs. Control) |
|               | 1st                | 2nd     | 3rd     | 4th     |         |      |    |                       |
|               | Control            | 100.00% | 100.00% | 100.00% | 100.00% |      |    |                       |
|               | 1µM                | 70.49%  | 102.13% | 80.82%  | 117.84% |      |    |                       |
|               | 5µM                | 103.14% | 87.52%  | 87.46%  | 113.44% |      |    |                       |
|               | 10µM               | 60.66%  | 69.11%  | 64.81%  | 67.84%  |      |    |                       |
| Concentration | Biomass            |         |         |         |         | Mean | SD | P-value (vs. Control) |
|               | 1st                | 2nd     | 3rd     | 4th     | 5th     |      |    |                       |
|               | Control            | 100.00% | 100.00% | 100.00% | 100.00% |      |    |                       |
|               | 1µM                | 71.41%  | 77.94%  | 96.54%  | 81.91%  |      |    |                       |
|               | 5µM                | 55.38%  | 64.06%  | 76.74%  | 79.34%  |      |    |                       |
|               | 10µM               | 32.96%  | 58.63%  | 68.36%  | 36.54%  |      |    |                       |

Supplementary Table S1 - Cell Viability Silmitasertib (to 100%Control)

| SU.86.86           |         |         |         |         |        |                       |
|--------------------|---------|---------|---------|---------|--------|-----------------------|
| Proliferation      |         |         |         |         |        |                       |
| Concentration      | 1st     | 2nd     | 3rd     | Mean    | SD     | P-value (vs. Control) |
| Control            | 100.00% | 100.00% | 100.00% | 100.00% | 0.00%  |                       |
| 1µM                | 97.93%  | 104.05% | 80.38%  | 94.12%  | 12.29% | 0.73                  |
| 5µM                | 72.41%  | 75.00%  | 61.39%  | 69.60%  | 7.23%  | 0.005                 |
| 10µM               | 46.90%  | 44.59%  | 31.01%  | 40.83%  | 8.59%  | <0.001                |
| Metabolic activity |         |         |         |         |        |                       |
| Concentration      | 1st     | 2nd     | 3rd     | Mean    | SD     | P-value (vs. Control) |
| Control            | 100.00% | 100.00% | 100.00% | 100.00% | 0.00%  |                       |
| 1µM                | 90.06%  | 101.06% | 98.64%  | 96.59%  | 5.78%  | >0.99                 |
| 5µM                | 81.88%  | 72.17%  | 58.51%  | 70.85%  | 11.74% | 0.04                  |
| 10µM               | 71.87%  | 47.80%  | 32.30%  | 50.66%  | 19.94% | 0.002                 |
| Biomass            |         |         |         |         |        |                       |
| Concentration      | 1st     | 2nd     | 3rd     | Mean    | SD     | P-value (vs. Control) |
| Control            | 100.00% | 100.00% | 100.00% | 100.00% | 0.00%  |                       |
| 1µM                | 101.36% | 94.56%  | 93.21%  | 96.38%  | 4.37%  | 0.96                  |
| 5µM                | 78.27%  | 72.59%  | 53.28%  | 68.05%  | 13.10% | 0.03                  |
| 10µM               | 53.20%  | 19.43%  | 21.03%  | 31.22%  | 19.05% | <0.001                |

| T3M4               |         |         |         |         |         |        |                       |
|--------------------|---------|---------|---------|---------|---------|--------|-----------------------|
| Proliferation      |         |         |         |         |         |        |                       |
| Concentration      | 1st     | 2nd     | 3rd     | 4th     | Mean    | SD     | P-value (vs. Control) |
| Control            | 100.00% | 100.00% | 100.00% | 100.00% | 100.00% | 0.00%  |                       |
| 1µM                | 149.04% | 125.00% | 132.14% | 119.05% | 131.31% | 12.98% | 0.001                 |
| 5µM                | 77.88%  | 62.50%  | 91.43%  | 81.48%  | 78.32%  | 12.00% | 0.02                  |
| 10µM               | 44.71%  | 37.50%  | 51.07%  | 48.41%  | 45.42%  | 5.89%  | <0.001                |
| Metabolic activity |         |         |         |         |         |        |                       |
| Concentration      | 1st     | 2nd     | 3rd     | 4th     | Mean    | SD     | P-value (vs. Control) |
| Control            | 100.00% | 100.00% | 100.00% | 100.00% | 100.00% | 0.00%  |                       |
| 1µM                | 135.94% | 126.00% | 119.44% | 101.79% | 120.79% | 14.37% | 0.02                  |
| 5µM                | 115.05% | 116.35% | 108.39% | 92.86%  | 108.16% | 10.78% | <0.001                |
| 10µM               | 86.76%  | 37.15%  | 75.80%  | 81.38%  | 70.27%  | 22.53% | <0.001                |
| Biomass            |         |         |         |         |         |        |                       |
| Concentration      | 1st     | 2nd     | 3rd     | 4th     | Mean    | SD     | P-value (vs. Control) |
| Control            | 100.00% | 100.00% | 100.00% | 100.00% | 100.00% | 0.00%  |                       |
| 1µM                | 94.04%  | 98.39%  | 96.61%  | 95.34%  | 96.10%  | 1.86%  | 0.6                   |
| 5µM                | 53.04%  | 58.82%  | 55.02%  | 59.01%  | 56.47%  | 2.93%  | <0.001                |
| 10µM               | 27.04%  | 10.68%  | 30.22%  | 32.46%  | 25.10%  | 9.87%  | <0.001                |

Supplementary Table S2 - IC50 Silmitasertib (μM)

|           | Proliferation | Metabolic Activity | Cell Biomass |
|-----------|---------------|--------------------|--------------|
| AsPc-1    | 4.855         | 8.769              | 2.019        |
| BxPc-3    | 2.131         | 6.949              | 1.691        |
| Capan-1   | 7.426         | 9.951              | 5.281        |
| Colo357   | 15.01         | 14.78              | 14.32        |
| Panc-1    | 13.34         | 19.01              | 8.615        |
| PaTu8902  | 14.84         | 10.78              | 13.09        |
| PaTu8988S | 16.20         | 38.73              | 11.50        |
| PaTu8988T | 9.925         | 11.51              | 11.89        |
| T3M4      | 9.087         | 10.53              | 5.697        |
| SU.86.86  | 8.091         | 10.07              | 7.006        |

Supplementary Table S3 - Cell Viability Dinaciclib (to 100%Control)

| AsPc-1        |                    |         |         |         |         |        |                       |
|---------------|--------------------|---------|---------|---------|---------|--------|-----------------------|
| Concentration | Proliferation      |         |         |         | Mean    | SD     | P-value (vs. Control) |
|               | 1st                | 2nd     | 3rd     | 4th     |         |        |                       |
| Control       | 100.00%            | 100.00% | 100.00% | 100.00% | 100.00% | 0.00%  |                       |
| 0.005 μM      |                    | 111.49% | 102.91% | 105.53% | 106.64% | 4.40%  | 0.45                  |
| 0.0075 μM     |                    | 56.17%  | 47.57%  | 56.60%  | 53.45%  | 5.09%  | <0.001                |
| 0.01μM        | 6.70%              | 27.23%  | 19.42%  | 32.77%  | 21.53%  | 11.30% | <0.001                |
| 0.1μM         | 1.79%              | 0.00%   | 2.91%   | 0.00%   | 1.18%   | 1.43%  | <0.001                |
| Concentration | Metabolic activity |         |         |         | Mean    | SD     | P-value (vs. Control) |
|               | 1st                | 2nd     | 3rd     | 4th     |         |        |                       |
| Control       | 100.00%            | 100.00% | 100.00% | 100.00% | 100.00% | 0.00%  |                       |
| 0.005 μM      |                    | 105.46% | 106.48% | 108.34% | 106.76% | 1.46%  | 0.93                  |
| 0.0075 μM     |                    | 96.94%  | 81.73%  | 105.05% | 94.57%  | 11.84% | 0.97                  |
| 0.01μM        | 8.43%              | 58.12%  | 72.37%  | 30.27%  | 42.30%  | 28.56% | <0.001                |
| 0.1μM         | 1.92%              | 3.93%   | 1.52%   | 5.82%   | 3.30%   | 1.98%  | <0.001                |
| Concentration | Biomass            |         |         |         | Mean    | SD     | P-value (vs. Control) |
|               | 1st                | 2nd     | 3rd     | 4th     |         |        |                       |
| Control       | 100.00%            | 100.00% | 100.00% | 100.00% | 100.00% | 0.00%  |                       |
| 0.005 μM      |                    | 92.92%  | 89.65%  | 86.52%  | 89.70%  | 3.20%  | 0.31                  |
| 0.0075 μM     |                    | 68.31%  | 42.00%  | 40.35%  | 50.22%  | 15.69% | 0.001                 |
| 0.01μM        | 2.80%              | 16.14%  | 24.72%  | 6.42%   | 12.52%  | 9.89%  | 0.001                 |
| 0.1μM         | 0.00%              | 0.27%   | 0.83%   | 0.66%   | 0.44%   | 0.38%  | <0.001                |

| BxPc-3             |         |         |         |         |        |                       |
|--------------------|---------|---------|---------|---------|--------|-----------------------|
| Proliferation      |         |         |         |         |        |                       |
| Concentration      | 1st     | 2nd     | 3rd     | Mean    | SD     | P-value (vs. Control) |
| Control            | 100.00% | 100.00% | 100.00% | 100.00% | 0.00%  |                       |
| 0.005 μM           | 104.76% | 102.91% | 109.00% | 105.56% | 3.12%  | 0.4                   |
| 0.0075 μM          | 48.48%  | 47.57%  | 58.77%  | 51.61%  | 6.22%  | <0.001                |
| 0.01μM             | 32.47%  | 19.42%  | 30.33%  | 27.41%  | 7.00%  | <0.001                |
| 0.1μM              | 1.30%   | 2.91%   | 0.47%   | 1.56%   | 1.24%  | <0.001                |
| Metabolic activity |         |         |         |         |        |                       |
| Concentration      | 1st     | 2nd     | 3rd     | Mean    | SD     | P-value (vs. Control) |
| Control            | 100.00% | 100.00% | 100.00% | 100.00% | 0.00%  |                       |
| 0.005 μM           | 92.33%  | 104.15% | 93.37%  | 96.62%  | 6.54%  | >0.99                 |
| 0.0075 μM          | 86.78%  | 97.44%  | 74.93%  | 86.38%  | 11.26% | 0.59                  |
| 0.01μM             | 61.05%  | 77.35%  | 22.59%  | 53.66%  | 28.12% | 0.007                 |
| 0.1μM              | 2.73%   | 2.39%   | 2.10%   | 2.41%   | 0.32%  | <0.001                |
| Biomass            |         |         |         |         |        |                       |
| Concentration      | 1st     | 2nd     | 3rd     | Mean    | SD     | P-value (vs. Control) |
| Control            | 100.00% | 100.00% | 100.00% | 100.00% | 0.00%  |                       |
| 0.005 μM           | 99.53%  | 91.55%  | 96.67%  | 95.92%  | 4.04%  | 0.97                  |
| 0.0075 μM          | 87.18%  | 65.94%  | 47.04%  | 66.72%  | 20.08% | 0.01                  |
| 0.01μM             | 20.03%  | 34.31%  | 7.31%   | 20.55%  | 13.51% | <0.001                |
| 0.1μM              | 0.15%   | 0.26%   | 0.10%   | 0.17%   | 0.08%  | <0.001                |

| Capan-1       |                    |         |         |         |        |                       |
|---------------|--------------------|---------|---------|---------|--------|-----------------------|
|               | Proliferation      |         |         |         |        |                       |
| Concentration | 1st                | 2nd     | 3rd     | Mean    | SD     | P-value (vs. Control) |
| Control       | 100.00%            | 100.00% | 100.00% | 100.00% | 0.00%  |                       |
| 0.001μM       | 102.67%            | 92.94%  | 97.96%  | 97.86%  | 4.87%  | 0.97                  |
| 0.01μM        | 48.00%             | 32.94%  | 51.02%  | 43.99%  | 9.69%  | <0.001                |
| 0.1μM         | 4.00%              | 8.24%   | 5.10%   | 5.78%   | 2.20%  | <0.001                |
| 1μM           | 1.30%              | 6.33%   | 7.29%   | 4.97%   | 3.22%  | <0.001                |
|               | Metabolic activity |         |         |         |        |                       |
| Concentration | 1st                | 2nd     | 3rd     | Mean    | SD     | P-value (vs. Control) |
| Control       | 100.00%            | 100.00% | 100.00% | 100.00% | 0.00%  |                       |
| 0.001μM       | 109.49%            | 93.77%  | 98.31%  | 100.52% | 8.09%  | >0.99                 |
| 0.01μM        | 54.20%             | 79.77%  | 74.24%  | 69.40%  | 13.45% | 0.004                 |
| 0.1μM         | 10.73%             | 17.10%  | 10.41%  | 12.75%  | 3.77%  | <0.001                |
| 1μM           | 13.43%             | 21.22%  | 1.36%   | 12.00%  | 10.01% | <0.001                |
|               | Biomass            |         |         |         |        |                       |
| Concentration | 1st                | 2nd     | 3rd     | Mean    | SD     | P-value (vs. Control) |
| Control       | 100.00%            | 100.00% | 100.00% | 100.00% | 0.00%  |                       |
| 0.001μM       | 83.70%             | 78.14%  | 87.86%  | 83.23%  | 4.88%  | 0.01                  |
| 0.01μM        | 23.94%             | 32.86%  | 45.04%  | 33.95%  | 10.59% | <0.001                |
| 0.1μM         | 0.97%              | 1.63%   | 2.32%   | 1.64%   | 0.68%  | <0.001                |
| 1μM           | 2.08%              | 5.89%   | 0.40%   | 2.79%   | 2.81%  | <0.001                |

Supplementary Table S3 - Cell Viability Dinaciclib (to 100%Control)

| Colo357       |                    |         |         |         |         |         |         |         |         |        |                       |                       |        |
|---------------|--------------------|---------|---------|---------|---------|---------|---------|---------|---------|--------|-----------------------|-----------------------|--------|
| Concentration | Proliferation      |         |         |         |         |         |         |         |         | Mean   | SD                    | P-value (vs. Control) |        |
|               | 1st                | 2nd     | 3rd     |         |         |         |         |         |         |        |                       |                       |        |
|               | Control            | 100.00% | 100.00% | 100.00% |         |         |         |         |         |        |                       |                       |        |
|               | 0.001μM            | 59.46%  | 45.56%  | 61.75%  |         |         |         |         |         |        |                       |                       |        |
|               | 0.01μM             | 10.42%  | 10.81%  | 10.88%  |         |         |         |         |         |        |                       |                       |        |
|               | 0.05μM             | 6.56%   | 5.08%   | 9.82%   |         |         |         |         |         |        |                       |                       |        |
| 0.1μM         | 6.95%              | 2.02%   | 2.46%   |         |         |         |         |         | 3.81%   | 2.73%  | <0.001                |                       |        |
| Concentration | Metabolic activity |         |         |         |         |         |         |         |         | Mean   | SD                    | P-value (vs. Control) |        |
|               | 1st                | 2nd     | 3rd     | 4th     |         |         |         |         |         |        |                       |                       |        |
|               | Control            | 100.00% | 100.00% | 100.00% | 100.00% |         |         |         |         |        |                       |                       |        |
|               | 0.001μM            | 94.12%  | 76.57%  | 77.64%  | 60.56%  |         |         |         |         |        |                       |                       |        |
|               | 0.01μM             | 39.40%  | 51.11%  | 40.57%  | 33.56%  |         |         |         |         |        |                       |                       |        |
|               | 0.05μM             | 8.79%   | 11.72%  | 7.42%   | 10.59%  |         |         |         |         |        |                       |                       |        |
| 0.1μM         | 15.01%             | 11.58%  | 7.92%   | 9.08%   |         |         |         |         |         | 10.90% | 3.14%                 | <0.001                |        |
| Concentration | Biomass            |         |         |         |         |         |         |         |         | Mean   | SD                    | P-value (vs. Control) |        |
|               | 1st                | 2nd     | 3rd     | 4th     |         |         |         |         |         |        |                       |                       |        |
|               | Control            | 100.00% | 100.00% | 100.00% | 100.00% |         |         |         |         |        |                       |                       |        |
|               | 0.001μM            | 73.52%  | 64.38%  | 70.06%  | 54.69%  |         |         |         |         |        |                       |                       |        |
|               | 0.01μM             | 16.70%  | 34.38%  | 14.10%  | 17.54%  |         |         |         |         |        |                       |                       |        |
|               | 0.05μM             | 7.01%   | 9.10%   | 4.75%   | 9.75%   |         |         |         |         |        |                       |                       |        |
| 0.1μM         | 13.17%             | 6.71%   | 2.33%   | 11.12%  |         |         |         |         |         | 8.33%  | 4.82%                 | <0.001                |        |
|               |                    |         |         |         |         |         |         |         |         |        |                       |                       |        |
| Panc-1        |                    |         |         |         |         |         |         |         |         |        |                       |                       |        |
| Concentration | Proliferation      |         |         |         |         |         |         |         |         | Mean   | SD                    | P-value (vs. Control) |        |
|               | 1st                | 2nd     | 3rd     | 4th     | 5th     | 6th     | 7th     | 8th     | 9th     |        |                       |                       |        |
|               | Control            | 100.00% | 100.00% | 100.00% | 100.00% | 100.00% | 100.00% | 100.00% | 100.00% |        |                       |                       |        |
|               | 0.001μM            | 124.09% | 118.52% | 111.56% |         |         |         |         |         |        |                       |                       |        |
|               | 0.01μM             |         |         |         |         |         |         | 53.19%  | 49.56%  |        |                       |                       | 41.55% |
|               | 0.025μM            |         |         |         |         |         |         | 20.21%  | 27.21%  |        |                       |                       | 19.01% |
|               | 0.05μM             |         |         |         | 13.24%  | 15.27%  | 12.33%  | 14.36%  | 19.91%  |        |                       |                       | 14.08% |
|               | 0.1μM              | 12.41%  | 5.93%   | 13.61%  | 2.94%   | 12.21%  | 5.48%   |         |         |        |                       |                       |        |
| 1μM           | 1.46%              | 2.96%   | 8.16%   |         |         |         |         |         |         | 8.76%  | 4.50%                 | <0.001                |        |
| 4.19%         | 3.52%              | <0.001  |         |         |         |         |         |         |         |        |                       |                       |        |
| Concentration | Metabolic activity |         |         |         |         |         |         |         |         | Mean   | SD                    | P-value (vs. Control) |        |
|               | 1st                | 2nd     | 3rd     | 4th     | 5th     | 6th     | 7th     | 8th     | 9th     |        |                       |                       |        |
|               | Control            | 100.00% | 100.00% | 100.00% | 100.00% | 100.00% | 100.00% | 100.00% | 100.00% |        |                       |                       |        |
|               | 0.001μM            | 95.16%  | 96.48%  | 99.26%  |         |         |         |         |         |        |                       |                       |        |
|               | 0.01μM             | 88.42%  | 94.71%  | 100.45% | 103.71% | 92.06%  | 108.72% | 84.54%  | 86.16%  |        |                       |                       | 93.61% |
|               | 0.025μM            |         |         |         |         |         |         | 31.23%  | 29.89%  |        |                       |                       | 40.43% |
|               | 0.05μM             |         |         |         | 27.01%  | 29.64%  | 26.40%  | 18.75%  | 22.35%  |        |                       |                       | 23.01% |
|               | 0.1μM              | 23.14%  | 21.72%  | 32.10%  | 30.80%  | 22.25%  | 15.99%  |         |         |        |                       |                       |        |
| 1μM           | 15.31%             | 19.76%  | 13.18%  |         |         |         |         |         |         | 24.33% | 6.07%                 | <0.001                |        |
| 16.08%        | 3.36%              | <0.001  |         |         |         |         |         |         |         |        |                       |                       |        |
| Concentration | Biomass            |         |         |         |         |         |         |         |         | Mean   | SD                    | P-value (vs. Control) |        |
|               | 1st                | 2nd     | 3rd     | 4th     | 5th     | 6th     | 7th     | 8th     | 9th     |        |                       |                       |        |
|               | Control            | 100.00% | 100.00% | 100.00% | 100.00% | 100.00% | 100.00% | 100.00% | 100.00% |        |                       |                       |        |
|               | 0.001μM            | 83.15%  | 108.16% | 107.15% |         |         |         |         |         |        |                       |                       |        |
|               | 0.01μM             | 53.16%  | 83.66%  | 85.13%  | 78.38%  | 68.46%  | 97.42%  | 64.76%  | 48.58%  |        |                       |                       | 34.13% |
|               | 0.025μM            |         |         |         |         |         |         | 20.14%  | 15.36%  |        |                       |                       | 14.62% |
|               | 0.05μM             |         |         |         | 14.02%  | 8.96%   | 8.57%   | 7.18%   | 8.90%   |        |                       |                       | 9.29%  |
|               | 0.1μM              | 4.92%   | 1.66%   | 3.12%   | 11.04%  | 6.41%   | 8.63%   |         |         |        |                       |                       |        |
| 1μM           | 7.24%              | 2.00%   | 2.31%   |         |         |         |         |         |         | 5.96%  | 3.49%                 | <0.001                |        |
| 3.85%         | 2.94%              | <0.001  |         |         |         |         |         |         |         |        |                       |                       |        |
|               |                    |         |         |         |         |         |         |         |         |        |                       |                       |        |
| PaTu8902      |                    |         |         |         |         |         |         |         |         |        |                       |                       |        |
| Concentration | Proliferation      |         |         |         |         |         |         |         | Mean    | SD     | P-value (vs. Control) |                       |        |
|               | 1st                | 2nd     | 3rd     | 4th     | 5th     |         |         |         |         |        |                       |                       |        |
|               | Control            | 100.00% | 100.00% | 100.00% | 100.00% | 100.00% |         |         |         |        |                       |                       |        |
|               | 0.001 μM           | 78.65%  | 105.00% | 109.62% | 93.42%  | 93.75%  |         |         |         |        |                       |                       |        |
|               | 0.0025 μM          |         | 86.00%  | 81.73%  | 77.63%  | 79.46%  |         |         |         |        |                       |                       |        |
|               | 0.005 μM           | 24.99%  | 43.00%  | 45.58%  | 38.16%  | 43.75%  |         |         |         |        |                       |                       |        |
| 0.0075 μM     | 5.62%              | 11.00%  | 9.62%   | 3.95%   | 9.82%   |         |         |         | 8.00%   | 3.04%  | <0.001                |                       |        |
| Concentration | Metabolic activity |         |         |         |         |         |         |         | Mean    | SD     | P-value (vs. Control) |                       |        |
|               | 1st                | 2nd     | 3rd     |         |         |         |         |         |         |        |                       |                       |        |
|               | Control            | 100.00% | 100.00% | 100.00% |         |         |         |         |         |        |                       |                       |        |
|               | 0.001 μM           | 91.13%  | 82.95%  | 75.05%  |         |         |         |         |         |        |                       |                       |        |
|               | 0.0025 μM          | 97.16%  | 72.17%  | 67.64%  |         |         |         |         |         |        |                       |                       |        |
|               | 0.005 μM           | 63.19%  | 54.84%  | 60.56%  |         |         |         |         |         |        |                       |                       |        |
| 0.0075 μM     | 30.19%             | 11.68%  | 17.96%  |         |         |         |         |         | 19.94%  | 9.41%  | <0.001                |                       |        |
| Concentration | Biomass            |         |         |         |         |         |         |         | Mean    | SD     | P-value (vs. Control) |                       |        |
|               | 1st                | 2nd     | 3rd     | 4th     |         |         |         |         |         |        |                       |                       |        |
|               | Control            | 100.00% | 100.00% | 100.00% | 100.00% |         |         |         |         |        |                       |                       |        |
|               | 0.001 μM           | 70.23%  | 85.63%  | 89.48%  | 77.68%  |         |         |         |         |        |                       |                       |        |
|               | 0.0025 μM          |         | 92.82%  | 75.99%  | 63.14%  |         |         |         |         |        |                       |                       |        |
|               | 0.005 μM           | 23.59%  | 70.78%  | 46.78%  | 55.58%  |         |         |         |         |        |                       |                       |        |
| 0.0075 μM     | 8.04%              | 12.80%  | 7.24%   | 23.02%  |         |         |         |         |         | 49.18% | 19.73%                | <0.001                |        |
| 12.78%        | 7.26%              | <0.001  |         |         |         |         |         |         |         |        |                       |                       |        |

Supplementary Table S3 - Cell Viability Dinaciclib (to 100%Control)

| PaTu8988S     |                    |         |         |         |         |         |         |        |                       |
|---------------|--------------------|---------|---------|---------|---------|---------|---------|--------|-----------------------|
| Concentration | Proliferation      |         |         |         |         |         | Mean    | SD     | P-value (vs. Control) |
|               | 1st                | 2nd     | 3rd     | 4th     | 5th     | 6th     |         |        |                       |
| Control       | 100.00%            | 100.00% | 100.00% | 100.00% | 100.00% | 100.00% | 100.00% | 0.00%  |                       |
| 0.001 μM      | 72.88%             | 93.55%  | 95.65%  |         |         |         | 87.36%  | 12.58% | 0.16                  |
| 0.005 μM      | 67.80%             | 88.17%  | 84.78%  | 95.35%  | 80.77%  | 79.73%  | 82.77%  | 9.26%  | 0.007                 |
| 0.0075 μM     | 50.85%             | 69.89%  | 67.39%  | 82.09%  | 69.23%  | 67.57%  | 67.84%  | 9.98%  | <0.001                |
| 0.01 μM       | 42.37%             | 30.11%  | 34.78%  | 55.35%  | 44.87%  | 33.78%  | 40.21%  | 9.26%  | <0.001                |
| 0.025 μM      |                    |         |         | 12.33%  | 7.69%   | 6.76%   | 8.93%   | 2.98%  | <0.001                |
| Concentration | Metabolic activity |         |         |         |         |         | Mean    | SD     | P-value (vs. Control) |
|               | 1st                | 2nd     | 3rd     | 4th     | 5th     | 6th     |         |        |                       |
| Control       | 100.00%            | 100.00% | 100.00% | 100.00% | 100.00% | 100.00% | 100.00% | 0.00%  |                       |
| 0.001 μM      | 73.54%             | 89.51%  | 77.02%  |         |         |         | 80.02%  | 8.40%  | 0.007                 |
| 0.005 μM      | 71.72%             | 73.91%  | 68.69%  | 71.82%  | 67.85%  | 98.34%  | 75.39%  | 11.46% | <0.001                |
| 0.0075 μM     | 53.60%             | 33.10%  | 46.47%  | 60.54%  | 64.39%  | 68.16%  | 54.38%  | 12.99% | <0.001                |
| 0.01 μM       | 49.05%             | 31.51%  | 34.40%  | 45.70%  | 29.75%  | 48.29%  | 39.78%  | 8.85%  | <0.001                |
| 0.025 μM      |                    |         |         | 19.02%  | 11.81%  | 17.99%  | 16.27%  | 3.90%  | <0.001                |
| Concentration | Biomass            |         |         |         |         |         | Mean    | SD     | P-value (vs. Control) |
|               | 1st                | 2nd     | 3rd     | 4th     | 5th     | 6th     |         |        |                       |
| Control       | 100.00%            | 100.00% | 100.00% | 100.00% | 100.00% | 100.00% | 100.00% | 0.00%  |                       |
| 0.001 μM      | 96.26%             | 74.45%  | 70.28%  |         |         |         | 80.33%  | 13.95% | 0.08                  |
| 0.005 μM      | 84.16%             | 85.34%  | 59.42%  | 69.84%  | 78.14%  | 85.46%  | 77.06%  | 10.53% | 0.008                 |
| 0.0075 μM     | 56.18%             | 72.18%  | 29.82%  | 67.20%  | 50.03%  | 41.69%  | 52.85%  | 15.83% | <0.001                |
| 0.01 μM       | 45.02%             | 46.21%  | 28.07%  | 37.72%  | 15.61%  | 20.28%  | 32.15%  | 12.85% | <0.001                |
| 0.025 μM      |                    |         |         | 14.12%  | 11.23%  | 13.14%  | 12.83%  | 1.47%  | <0.001                |

| PaTu8988T     |                    |         |         |         |         |  |         |        |                       |
|---------------|--------------------|---------|---------|---------|---------|--|---------|--------|-----------------------|
| Concentration | Proliferation      |         |         |         |         |  | Mean    | SD     | P-value (vs. Control) |
|               | 1st                | 2nd     | 3rd     |         |         |  |         |        |                       |
| Control       | 100.00%            | 100.00% | 100.00% |         |         |  | 100.00% | 0.00%  |                       |
| 0.001μM       | 77.70%             | 72.51%  | 77.48%  |         |         |  | 75.90%  | 2.94%  | <0.001                |
| 0.005μM       | 53.24%             | 51.79%  | 34.44%  |         |         |  | 46.49%  | 10.46% | <0.001                |
| 0.0075μM      | 2.16%              | 7.97%   | 2.65%   |         |         |  | 4.26%   | 3.22%  | <0.001                |
| 0.01μM        | 3.60%              | 6.37%   | 3.31%   |         |         |  | 4.43%   | 1.69%  | <0.001                |
| Concentration | Metabolic activity |         |         |         |         |  | Mean    | SD     | P-value (vs. Control) |
|               | 1st                | 2nd     | 3rd     | 4th     | 5th     |  |         |        |                       |
| Control       | 100.00%            | 100.00% | 100.00% | 100.00% | 100.00% |  | 100.00% | 0.00%  |                       |
| 0.001μM       | 77.87%             | 95.52%  | 61.41%  | 65.32%  | 115.93% |  | 83.21%  | 22.62% | 0.15                  |
| 0.005μM       |                    | 49.72%  | 57.74%  | 25.34%  | 38.42%  |  | 42.81%  | 14.08% | <0.001                |
| 0.0075μM      |                    | 11.49%  | 14.05%  | 6.81%   | 14.73%  |  | 11.77%  | 3.59%  | <0.001                |
| 0.01μM        | 9.22%              | 9.70%   | 9.24%   |         | 9.50%   |  | 9.42%   | 0.23%  | <0.001                |
| Concentration | Biomass            |         |         |         |         |  | Mean    | SD     | P-value (vs. Control) |
|               | 1st                | 2nd     | 3rd     | 4th     |         |  |         |        |                       |
| Control       | 100.00%            | 100.00% | 100.00% | 100.00% |         |  | 100.00% | 0.00%  |                       |
| 0.001μM       | 87.30%             | 90.10%  | 71.03%  | 82.93%  |         |  | 82.84%  | 8.41%  | 0.002                 |
| 0.005μM       | 48.27%             | 42.96%  | 30.30%  | 28.94%  |         |  | 37.62%  | 9.50%  | <0.001                |
| 0.0075μM      | 10.73%             | 11.81%  | 11.44%  | 8.90%   |         |  | 10.72%  | 1.29%  | <0.001                |
| 0.01μM        | 8.30%              | 11.30%  | 8.84%   | 7.14%   |         |  | 8.90%   | 1.75%  | <0.001                |

| SU.86.86      |                    |         |         |  |  |  |         |        |                       |
|---------------|--------------------|---------|---------|--|--|--|---------|--------|-----------------------|
| Concentration | Proliferation      |         |         |  |  |  | Mean    | SD     | P-value (vs. Control) |
|               | 1st                | 2nd     | 3rd     |  |  |  |         |        |                       |
| Control       | 100.00%            | 100.00% | 100.00% |  |  |  | 100.00% | 0.00%  |                       |
| 0.005 μM      | 81.82%             | 95.49%  | 82.31%  |  |  |  | 86.54%  | 7.75%  | 0.04                  |
| 0.0075 μM     | 69.55%             | 56.39%  | 66.15%  |  |  |  | 64.03%  | 6.83%  | <0.001                |
| 0.01μM        | 45.91%             | 37.59%  | 50.77%  |  |  |  | 44.76%  | 6.67%  | <0.001                |
| 0.1μM         | 7.27%              | 5.26%   | 5.38%   |  |  |  | 5.97%   | 1.13%  | <0.001                |
| Concentration | Metabolic activity |         |         |  |  |  | Mean    | SD     | P-value (vs. Control) |
|               | 1st                | 2nd     | 3rd     |  |  |  |         |        |                       |
| Control       | 100.00%            | 100.00% | 100.00% |  |  |  | 100.00% | 0.00%  |                       |
| 0.005 μM      | 72.94%             | 97.83%  | 100.22% |  |  |  | 90.33%  | 15.11% | 0.68                  |
| 0.0075 μM     | 70.28%             | 81.54%  | 70.79%  |  |  |  | 74.20%  | 6.36%  | 0.06                  |
| 0.01μM        | 46.05%             | 77.87%  | 50.09%  |  |  |  | 58.00%  | 17.32% | 0.003                 |
| 0.1μM         | 35.78%             | 26.34%  | 41.26%  |  |  |  | 34.46%  | 7.55%  | <0.001                |
| Concentration | Biomass            |         |         |  |  |  | Mean    | SD     | P-value (vs. Control) |
|               | 1st                | 2nd     | 3rd     |  |  |  |         |        |                       |
| Control       | 100.00%            | 100.00% | 100.00% |  |  |  | 100.00% | 0.00%  |                       |
| 0.005 μM      | 100.30%            | 88.19%  | 96.83%  |  |  |  | 95.11%  | 6.24%  | 0.89                  |
| 0.0075 μM     | 89.89%             | 78.96%  | 65.79%  |  |  |  | 78.21%  | 12.07% | 0.04                  |
| 0.01μM        | 70.20%             | 57.49%  | 43.39%  |  |  |  | 57.03%  | 13.41% | <0.001                |
| 0.1μM         | 14.63%             | 9.67%   | 9.89%   |  |  |  | 11.40%  | 2.80%  | <0.001                |

Supplementary Table S3 - Cell Viability Dinaciclib (to 100%Control)

| T3M4          |                    |         |         |         |         |        |                       |
|---------------|--------------------|---------|---------|---------|---------|--------|-----------------------|
| Concentration | Proliferation      |         |         |         | Mean    | SD     | P-value (vs. Control) |
|               | 1st                | 2nd     | 3rd     | 4th     |         |        |                       |
| Control       | 100.00%            | 100.00% | 100.00% | 100.00% | 100.00% | 0.00%  |                       |
| 0.001 μM      | 90.87%             | 90.57%  | 91.43%  | 91.01%  | 90.97%  | 0.36%  | <0.001                |
| 0.0025 μM     | 80.77%             | 79.25%  | 85.36%  | 80.42%  | 81.45%  | 2.69%  | <0.001                |
| 0.005 μM      | 77.88%             | 75.94%  | 78.21%  | 73.02%  | 76.26%  | 2.38%  | <0.001                |
| 0.0075 μM     | 26.44%             | 26.89%  | 27.86%  | 20.90%  | 25.52%  | 3.14%  | <0.001                |
| Concentration | Metabolic activity |         |         |         | Mean    | SD     | P-value (vs. Control) |
|               | 1st                | 2nd     | 3rd     | 4th     |         |        |                       |
| Control       | 100.00%            | 100.00% | 100.00% | 100.00% | 100.00% | 0.00%  |                       |
| 0.001 μM      | 86.69%             | 85.81%  | 84.95%  | 81.93%  | 84.85%  | 2.07%  | 0.008                 |
| 0.0025 μM     | 64.11%             | 73.51%  | 83.61%  | 72.47%  | 73.43%  | 7.99%  | <0.001                |
| 0.005 μM      | 58.09%             | 58.32%  | 68.18%  | 63.37%  | 61.99%  | 4.79%  | <0.001                |
| 0.0075 μM     | 35.29%             | 19.68%  | 40.56%  | 35.57%  | 32.78%  | 9.06%  | <0.001                |
| Concentration | Biomass            |         |         |         | Mean    | SD     | P-value (vs. Control) |
|               | 1st                | 2nd     | 3rd     | 4th     |         |        |                       |
| Control       | 100.00%            | 100.00% | 100.00% | 100.00% | 100.00% | 0.00%  |                       |
| 0.001 μM      | 62.31%             | 77.39%  | 95.83%  | 92.32%  | 81.96%  | 15.35% | 0.36                  |
| 0.0025 μM     | 52.59%             | 73.37%  | 95.66%  | 91.66%  | 78.32%  | 19.71% | 0.22                  |
| 0.005 μM      | 43.37%             | 69.29%  | 92.59%  | 74.47%  | 69.93%  | 20.33% | 0.06                  |
| 0.0075 μM     | 17.39%             | 36.24%  | 57.77%  | 35.71%  | 36.78%  | 16.51% | <0.001                |



Supplementary Table S4 - IC50 Dinaciclib(μM)

|           | Proliferation | Metabolic Activity | Cell Biomass |
|-----------|---------------|--------------------|--------------|
| AsPc-1    | 0.005229      | 0.007234           | 0.005017     |
| BxPc-3    | 0.007975      | 0.01027            | 0.008264     |
| Capan-1   | 0.009291      | 0.01389            | 0.006561     |
| Colo357   | 0.001253      | 0.005359           | 0.002164     |
| Panc-1    | 0.01111       | 0.02789            | 0.0139       |
| PaTu8902  | 0.004146      | 0.004889           | 0.004156     |
| PaTu8988S | 0.009124      | 0.008096           | 0.007789     |
| PaTu8988T | 0.004939      | 0.00317            | 0.003000     |
| SU.86.86  | 0.009257      | 0.0335             | 0.0108       |
| T3M4      | 0.006146      | 0.005485           | 0.005237     |

Supplementary Table S5 - Apoptosis/Necrosis Silmitasertib (%)

| AsPc-1        |             |         |             |         |             |         | Mean        | SD      | P-Value (vs. Control) |         |       |                       |
|---------------|-------------|---------|-------------|---------|-------------|---------|-------------|---------|-----------------------|---------|-------|-----------------------|
|               | 1st         |         | 2nd         |         | 3rd         |         |             |         |                       |         |       |                       |
| Concentration | G2(YP+/PI-) | G3(PI+) | G2(YP+/PI-) | G3(PI+) | G2(YP+/PI-) | G3(PI+) | G2+G3       |         |                       |         |       |                       |
| Control       | 0.56        | 4.71    | 1.94        | 5.43    | 1.34        | 2.14    | 5.37        | 1.59    |                       |         |       |                       |
| 1µM           | 0.91        | 9.95    | 1.62        | 10.0    | 1.42        | 4.47    | 9.46        | 2.54    | 0.42                  |         |       |                       |
| 5µM           | 0.55        | 8.22    | 0.94        | 14.5    | 0.88        | 9.45    | 11.51       | 2.85    | 0.16                  |         |       |                       |
| 10µM          | 0.66        | 18.5    | 1.31        | 27.7    | 1.11        | 20.1    | 23.13       | 4.24    | <0.001                |         |       |                       |
| BxPc-3        |             |         |             |         |             |         |             |         |                       |         |       |                       |
|               | 1st         |         | 2nd         |         | 3rd         |         | Mean        | SD      | P-Value (vs. Control) |         |       |                       |
| Concentration | G2(YP+/PI-) | G3(PI+) | G2(YP+/PI-) | G3(PI+) | G2(YP+/PI-) | G3(PI+) | G2+G3       |         |                       |         |       |                       |
| Control       | 0.43        | 2.01    | 1.98        | 1.24    | 1.95        | 2.02    | 3.21        | 0.62    |                       |         |       |                       |
| 1µM           | 0.97        | 6.17    | 1.42        | 3.79    | 1.59        | 1.48    | 5.14        | 1.66    | 0.32                  |         |       |                       |
| 2.5µM         | 0.91        | 4.94    | 1.27        | 3.53    | 1.17        | 2.20    | 4.67        | 1.02    | 0.52                  |         |       |                       |
| 5µM           | 0.77        | 6.47    | 0.90        | 7.01    | 0.90        | 4.00    | 6.68        | 1.29    | 0.05                  |         |       |                       |
| Capan-1       |             |         |             |         |             |         |             |         |                       |         |       |                       |
|               | 1st         |         | 2nd         |         | 3rd         |         | Mean        | SD      | P-Value (vs. Control) |         |       |                       |
| Concentration | G2(YP+/PI-) | G3(PI+) | G2(YP+/PI-) | G3(PI+) | G2(YP+/PI-) | G3(PI+) | G2+G3       |         |                       |         |       |                       |
| Control       | 7.43        | 10.4    | 3.59        | 7.20    | 2.88        | 5.47    | 12.32       | 4.02    |                       |         |       |                       |
| 1µM           | 8.75        | 11.9    | 6.70        | 7.18    | 7.30        | 4.14    | 15.32       | 3.90    | 0.85                  |         |       |                       |
| 5µM           | 8.84        | 11.9    | 5.55        | 9.10    | 2.25        | 6.88    | 14.84       | 4.74    | 0.9                   |         |       |                       |
| 10µM          | 5.47        | 19.7    | 3.68        | 14.4    | 2.76        | 9.30    | 18.44       | 5.36    | 0.44                  |         |       |                       |
| Colo357       |             |         |             |         |             |         |             |         |                       |         |       |                       |
|               | 1st         |         | 2nd         |         | 3rd         |         | 4th         |         | 5th                   | Mean    | SD    | P-Value (vs. Control) |
| Concentration | G2(YP+/PI-) | G3(PI+) | G2(YP+/PI-) | G3(PI+) | G2(YP+/PI-) | G3(PI+) | G2(YP+/PI-) | G3(PI+) | G2(YP+/PI-)           | G3(PI+) | G2+G3 |                       |
| Control       | 2.91        | 2.23    | 2.38        | 1.81    | 3.01        | 0.73    | 1.41        | 0.90    | 1.65                  | 0.88    | 3.58  | 1.05                  |
| 1µM           | 1.21        | 0.68    | 1.72        | 1.09    | 0.71        | 0.60    | 1.31        | 0.94    | 0.80                  | 0.56    | 1.92  | 0.56                  |
| 5µM           | 1.41        | 0.83    | 1.10        | 0.83    | 1.13        | 0.48    | 0.59        | 0.63    | 0.52                  | 0.38    | 1.58  | 0.48                  |
| 10µM          | 1.32        | 1.40    | 0.86        | 0.97    | 1.89        | 0.61    | 0.53        | 0.82    | 1.67                  | 0.69    | 2.15  | 0.50                  |
| Panc-1        |             |         |             |         |             |         |             |         |                       |         |       |                       |
|               | 1st         |         | 2nd         |         | 3rd         |         | Mean        | SD      | P-Value (vs. Control) |         |       |                       |
| Concentration | G2(YP+/PI-) | G3(PI+) | G2(YP+/PI-) | G3(PI+) | G2(YP+/PI-) | G3(PI+) | G2+G3       |         |                       |         |       |                       |
| Control       | 0.41        | 1.76    | 0.36        | 0.80    | 0.13        | 1.25    | 1.57        | 0.43    |                       |         |       |                       |
| 1µM           | 0.097       | 0.70    | 0.12        | 1.19    | 0.00        | 0.75    | 0.95        | 0.25    | 0.32                  |         |       |                       |
| 5µM           | 0.17        | 0.66    | 0.16        | 1.93    | 0.24        | 1.55    | 1.57        | 0.54    | >0.99                 |         |       |                       |
| 10µM          | 0.24        | 0.72    | 0.25        | 1.25    | 0.00        | 1.40    | 1.29        | 0.23    | 0.81                  |         |       |                       |
| PaTu8902      |             |         |             |         |             |         |             |         |                       |         |       |                       |
|               | 1st         |         | 2nd         |         | 3rd         |         | Mean        | SD      | P-Value (vs. Control) |         |       |                       |
| Concentration | G2(YP+/PI-) | G3(PI+) | G2(YP+/PI-) | G3(PI+) | G2(YP+/PI-) | G3(PI+) | G2+G3       |         |                       |         |       |                       |
| Control       | 0.45        | 0.70    | 0.41        | 0.99    | 0.18        | 1.35    | 1.36        | 0.16    |                       |         |       |                       |
| 1µM           | 0.051       | 0.60    | 0.31        | 1.04    | 0.25        | 0.99    | 1.08        | 0.31    | 0.98                  |         |       |                       |
| 5µM           | 0.046       | 0.57    | 0.14        | 1.02    | 0.12        | 1.41    | 1.10        | 0.38    | 0.98                  |         |       |                       |
| 7.5µM         | 0.041       | 0.62    | 0.21        | 3.49    | 0.082       | 1.15    | 1.86        | 1.32    | 0.85                  |         |       |                       |
| 10µM          | 0.056       | 1.26    | 0.10        | 1.86    | 0.089       | 1.78    | 1.71        | 0.28    | 0.95                  |         |       |                       |
| PaTu8988S     |             |         |             |         |             |         |             |         |                       |         |       |                       |
|               | 1st         |         | 2nd         |         | 3rd         |         | Mean        | SD      | P-Value (vs. Control) |         |       |                       |
| Concentration | G2(YP+/PI-) | G3(PI+) | G2(YP+/PI-) | G3(PI+) | G2(YP+/PI-) | G3(PI+) | G2+G3       |         |                       |         |       |                       |
| Control       | 2.09        | 11.7    | 2.04        | 12.8    | 3.68        | 12.1    | 14.80       | 0.81    |                       |         |       |                       |
| 1µM           | 1.93        | 6.24    | 2.87        | 11.3    | 4.69        | 8.30    | 11.78       | 2.60    | >0.99                 |         |       |                       |
| 5µM           | 1.36        | 4.51    | 1.11        | 11.7    | 1.87        | 6.13    | 8.89        | 2.90    | 0.18                  |         |       |                       |
| 7.5µM         | 1.18        | 6.31    | 0.59        | 11.7    | 1.41        | 4.37    | 8.52        | 2.76    | 0.09                  |         |       |                       |
| 10µM          | 0.91        | 6.38    | 0.40        | 14.5    | 1.19        | 6.07    | 9.82        | 3.59    | 0.40                  |         |       |                       |
| PaTu8988T     |             |         |             |         |             |         |             |         |                       |         |       |                       |
|               | 1st         |         | 2nd         |         | 3rd         |         | Mean        | SD      | P-Value (vs. Control) |         |       |                       |
| Concentration | G2(YP+/PI-) | G3(PI+) | G2(YP+/PI-) | G3(PI+) | G2(YP+/PI-) | G3(PI+) | G2+G3       |         |                       |         |       |                       |
| Control       | 0.053       | 0.99    | 0.23        | 0.57    | 0.098       | 1.34    | 1.09        | 0.26    |                       |         |       |                       |
| 1µM           | 0.032       | 1.00    | 0.17        | 0.74    | 0.062       | 1.21    | 1.07        | 0.15    | >0.99                 |         |       |                       |
| 5µM           | 0.031       | 0.87    | 0.069       | 0.76    | 0.048       | 1.20    | 0.99        | 0.18    | 0.99                  |         |       |                       |
| 7.5µM         | 0.01        | 1.00    | 0.00687     | 0.94    | 0.062       | 1.25    | 1.09        | 0.16    | >0.99                 |         |       |                       |
| 10µM          | 0.036       | 1.20    | 0.02        | 0.91    | 0.055       | 1.95    | 1.39        | 0.45    | 0.65                  |         |       |                       |
| SU.86.86      |             |         |             |         |             |         |             |         |                       |         |       |                       |
|               | 1st         |         | 2nd         |         | 3rd         |         | Mean        | SD      | P-Value (vs. Control) |         |       |                       |
| Concentration | G2(YP+/PI-) | G3(PI+) | G2(YP+/PI-) | G3(PI+) | G2(YP+/PI-) | G3(PI+) | G2+G3       |         |                       |         |       |                       |
| Control       | 2.15        | 3.09    | 1.9         | 5.26    | 1.71        | 3.91    | 6.01        | 0.83    |                       |         |       |                       |
| 1µM           | 0.89        | 3.06    | 1.54        | 4.24    | 2.69        | 4.62    | 5.68        | 1.37    | 0.96                  |         |       |                       |
| 5µM           | 0.86        | 2.97    | 1.29        | 2.77    | 2.03        | 2.31    | 4.08        | 0.21    | 0.10                  |         |       |                       |
| 10µM          | 1.38        | 4.20    | 1.18        | 4.15    | 1.92        | 3.48    | 5.44        | 0.11    | 0.82                  |         |       |                       |
| T3M4          |             |         |             |         |             |         |             |         |                       |         |       |                       |
|               | 1st         |         | 2nd         |         | 3rd         |         | Mean        | SD      | P-Value (vs. Control) |         |       |                       |
| Concentration | G2(YP+/PI-) | G3(PI+) | G2(YP+/PI-) | G3(PI+) | G2(YP+/PI-) | G3(PI+) | G2+G3       |         |                       |         |       |                       |
| Control       | 4.04        | 2.76    | 6.13        | 5.88    | 2.75        | 5.85    | 9.14        | 2.16    |                       |         |       |                       |
| 1µM           | 2.44        | 1.54    | 7.27        | 2.14    | 2.12        | 2.03    | 5.85        | 2.52    | 0.89                  |         |       |                       |
| 5µM           | 2.44        | 2.34    | 2.49        | 5.74    | 1.51        | 2.85    | 5.79        | 1.73    | 0.88                  |         |       |                       |
| 7.5µM         | 2.64        | 5.65    | 2.59        | 16.3    | 2.41        | 10.3    | 13.30       | 4.35    | 0.79                  |         |       |                       |
| 10µM          | 3.5         | 14.3    | 5.26        | 33.9    | 6.12        | 24.9    | 29.33       | 8.80    | 0.005                 |         |       |                       |

G2: Apoptosis  
G3: Necrosis  
G2+G3: Cell Deaths

Supplementary Table S6 - Apoptosis/Necrosis Dinaciclib (%)

| G2c-1         |             |         |             |         |             |         |             |         |             | Mean    | SD     | P-Value (vs. Control) |
|---------------|-------------|---------|-------------|---------|-------------|---------|-------------|---------|-------------|---------|--------|-----------------------|
|               | 1st         |         | 2nd         |         | 3rd         |         |             |         |             |         |        |                       |
| Concentration | G2(YP+/PI-) | G3(PI+) | G2(YP+/PI-) | G3(PI+) | G2(YP+/PI-) | G3(PI+) |             | G2+G3   |             |         |        |                       |
| Control       | 1.08        | 2.75    | 1.83        | 3.77    | 0.97        | 2.31    |             | 4.24    | 0.99        |         |        |                       |
| 0.005µM       | 2.34        | 6.83    | 1.35        | 10.7    | 0.90        | 3.24    |             | 8.45    | 3.27        | 0.29    |        |                       |
| 0.0075µM      | 2.55        | 11.1    | 1.52        | 12.5    | 1.54        | 6.03    |             | 11.75   | 2.96        | 0.04    |        |                       |
| 0.01µM        | 2.14        | 16.8    | 2.10        | 18.8    | 3.86        | 20.5    |             | 21.40   | 2.24        | <0.001  |        |                       |
|               |             |         |             |         |             |         |             |         |             |         |        |                       |
| BxPc-3        |             |         |             |         |             |         |             |         |             | Mean    | SD     | P-Value (vs. Control) |
|               | 1st         |         | 2nd         |         | 3rd         |         |             |         |             |         |        |                       |
| Concentration | G2(YP+/PI-) | G3(PI+) | G2(YP+/PI-) | G3(PI+) | G2(YP+/PI-) | G3(PI+) |             | G2+G3   |             |         |        |                       |
| Control       | 0.46        | 1.82    | 1.55        | 1.75    | 1.31        | 2.82    |             | 3.24    | 0.76        |         |        |                       |
| 0.005µM       | 1.35        | 6.64    | 4.04        | 4.33    | 1.68        | 2.19    |             | 6.74    | 2.04        | 0.39    |        |                       |
| 0.0075µM      | 1.08        | 10.3    | 3.57        | 6.95    | 1.64        | 2.82    |             | 8.79    | 3.08        | 0.12    |        |                       |
| 0.01µM        | 1.15        | 15.7    | 2.16        | 17.7    | 2.91        | 9.54    |             | 16.39   | 3.04        | 0.002   |        |                       |
|               |             |         |             |         |             |         |             |         |             |         |        |                       |
| Capan-1       |             |         |             |         |             |         |             |         |             | Mean    | SD     | P-Value (vs. Control) |
|               | 1st         |         | 2nd         |         | 3rd         |         | 4th         |         |             |         |        |                       |
| Concentration | G2(YP+/PI-) | G3(PI+) | G2(YP+/PI-) | G3(PI+) | G2(YP+/PI-) | G3(PI+) | G2(YP+/PI-) | G3(PI+) | G2+G3       |         |        |                       |
| Control       | 4.28        | 5.17    | 4.59        | 7.47    | 4.74        | 7.33    | 3.16        | 7.26    | 11.00       | 1.12    |        |                       |
| 0.001µM       | 5.20        | 6.33    | 5.23        | 3.75    | 5.23        | 8.22    | 3.14        | 7.87    | 11.24       | 1.59    | >0.99  |                       |
| 0.01µM        | 8.01        | 17.3    | 6.79        | 10.7    | 6.31        | 12.9    | 10.9        | 11.1    | 21.00       | 2.96    | <0.001 |                       |
| 0.1µM         | 7.71        | 37.2    | 7.09        | 41.8    | 8.09        | 37.6    | 12.3        | 34.9    | 46.67       | 1.52    | <0.001 |                       |
|               |             |         |             |         |             |         |             |         |             |         |        |                       |
| Colo357       |             |         |             |         |             |         |             |         |             | Mean    | SD     | P-Value (vs. Control) |
|               | 1st         |         | 2nd         |         | 3rd         |         | 4th         |         | 5th         |         |        |                       |
| Concentration | G2(YP+/PI-) | G3(PI+) | G2+G3  |                       |
| Control       | 2.50        | 2.14    | 2.41        | 1.41    | 1.42        | 0.96    | 1.04        | 1.06    | 1.60        | 0.99    | 3.11   |                       |
| 0.001µM       | 3.85        | 1.60    | 4.65        | 3.13    | 4.47        | 1.01    | 1.86        | 1.71    | 1.20        | 1.45    | 4.99   |                       |
| 0.01µM        | 5.06        | 2.00    | 4.82        | 5.51    | 4.00        | 2.84    | 3.21        | 2.87    | 2.91        | 4.71    | 7.59   |                       |
| 0.05µM        | 1.96        | 12.7    | 1.70        | 10.4    | 2.89        | 12.3    | 2.02        | 7.01    | 2.22        | 14.8    | 13.60  |                       |
|               |             |         |             |         |             |         |             |         |             |         |        |                       |
| Panc-1        |             |         |             |         |             |         |             |         |             | Mean    | SD     | P-Value (vs. Control) |
|               | 1st         |         | 2nd         |         | 3rd         |         | 4th         |         |             |         |        |                       |
| Concentration | G2(YP+/PI-) | G3(PI+) | G2(YP+/PI-) | G3(PI+) | G2(YP+/PI-) | G3(PI+) | G2(YP+/PI-) | G3(PI+) | G2+G3       |         |        |                       |
| Control       | 0.98        | 0.72    | 0.94        | 0.71    | 0.28        | 2.26    | 0.40        | 2.71    | 2.25        | 0.61    |        |                       |
| 0.001µM       | 0.48        | 1.92    | 0.50        | 1.84    | 0.39        | 6.29    | 0.46        | 9.79    | 5.42        | 3.30    | 0.63   |                       |
| 0.01µM        | 1.53        | 1.43    | 1.61        | 1.43    | 0.96        | 6.16    | 1.00        | 8.44    | 5.64        | 2.76    | 0.58   |                       |
| 0.05µM        | 10.6        | 3.60    | 10.5        | 3.09    | 12.4        | 14.9    | 0.48        | 10.7    | 16.57       | 6.30    | 0.002  |                       |
|               |             |         |             |         |             |         |             |         |             |         |        |                       |
| PaTu8902      |             |         |             |         |             |         |             |         |             | Mean    | SD     | P-Value (vs. Control) |
|               | 1st         |         | 2nd         |         | 3rd         |         |             |         |             |         |        |                       |
| Concentration | G2(YP+/PI-) | G3(PI+) | G2(YP+/PI-) | G3(PI+) | G2(YP+/PI-) | G3(PI+) |             | G2+G3   |             |         |        |                       |
| Control       | 0.51        | 1.01    | 1.15        | 1.88    | 0.10        | 1.17    |             | 1.94    | 0.78        |         |        |                       |
| 0.003µM       | 0.26        | 1.81    | 0.55        | 3.17    | 0.19        | 0.41    |             | 2.13    | 1.27        | >0.99   |        |                       |
| 0.005µM       | 0.59        | 1.77    | 0.94        | 3.71    | 0.20        | 1.05    |             | 2.75    | 1.42        | >0.99   |        |                       |
| 0.006µM       | 0.65        | 3.29    | 2.75        | 12.1    | 0.31        | 1.34    |             | 6.81    | 5.76        | 0.75    |        |                       |
| 0.0075µM      | 1.10        | 7.69    | 4.15        | 15.5    | 0.82        | 2.84    |             | 10.70   | 6.67        | 0.28    |        |                       |
| 0.01µM        | 3.62        | 19.5    | 5.27        | 27.8    | 5.96        | 9.50    |             | 23.88   | 7.21        | 0.002   |        |                       |
|               |             |         |             |         |             |         |             |         |             |         |        |                       |
| PaTu8988S     |             |         |             |         |             |         |             |         |             | Mean    | SD     | P-Value (vs. Control) |
|               | 1st         |         | 2nd         |         | 3rd         |         |             |         |             |         |        |                       |
| Concentration | G2(YP+/PI-) | G3(PI+) | G2(YP+/PI-) | G3(PI+) | G2(YP+/PI-) | G3(PI+) |             | G2+G3   |             |         |        |                       |
| Control       | 4.02        | 18.2    | 3.03        | 10.1    | 3.87        | 16.8    |             | 18.67   | 3.97        |         |        |                       |
| 0.005µM       | 4.23        | 9.84    | 2.00        | 5.21    | 3.60        | 9.40    |             | 11.43   | 3.01        | 0.04    |        |                       |
| 0.0075µM      | 3.63        | 9.95    | 2.02        | 9.82    | 3.16        | 7.65    |             | 12.08   | 1.14        | 0.07    |        |                       |
| 0.01µM        | 3.36        | 10.1    | 2.32        | 10.2    | 2.88        | 6.41    |             | 11.76   | 1.79        | 0.05    |        |                       |
| 0.05µM        | 2.33        | 10.9    | 1.41        | 11.0    | 1.60        | 12.4    |             | 13.21   | 0.65        | 0.14    |        |                       |
|               |             |         |             |         |             |         |             |         |             |         |        |                       |
| PaTu8988T     |             |         |             |         |             |         |             |         |             | Mean    | SD     | P-Value (vs. Control) |
|               | 1st         |         | 2nd         |         | 3rd         |         | 4th         |         |             |         |        |                       |
| Concentration | G2(YP+/PI-) | G3(PI+) | G2(YP+/PI-) | G3(PI+) | G2(YP+/PI-) | G3(PI+) | G2(YP+/PI-) | G3(PI+) | G2+G3       |         |        |                       |
| Control       | 0.38        | 2.6     | 6.36        | 4.65    | 0.42        | 1.65    | 0.26        | 3.81    | 5.03        | 3.52    |        |                       |
| 0.003µM       | 0.14        | 1.61    | 4.03        | 6.08    | 0.28        | 1.65    | 0.32        | 2.18    | 4.07        | 3.50    | >0.99  |                       |
| 0.005µM       | 0.25        | 2.19    | 3.41        | 7.34    | 0.51        | 2.45    | 0.49        | 3.85    | 5.12        | 3.32    | >0.99  |                       |
| 0.006µM       | 0.35        | 2.3     | 3.72        | 9.30    | 0.56        | 2.80    | 0.91        | 4.76    | 6.18        | 4.11    | >0.99  |                       |
| 0.01µM        | 0.83        | 9.23    | 4.54        | 22.2    | 1.71        | 5.03    | 7.49        | 12.60   | 15.91       | 7.95    | 0.38   |                       |
|               |             |         |             |         |             |         |             |         |             |         |        |                       |
| SU.86.86      |             |         |             |         |             |         |             |         |             | Mean    | SD     | P-Value (vs. Control) |
|               | 1st         |         | 2nd         |         | 3rd         |         |             |         |             |         |        |                       |
| Concentration | G2(YP+/PI-) | G3(PI+) | G2(YP+/PI-) | G3(PI+) | G2(YP+/PI-) | G3(PI+) |             | G2+G3   |             |         |        |                       |
| Control       | 3.82        | 3.94    | 4.02        | 6.45    | 2.70        | 6.10    |             | 9.01    | 1.12        |         |        |                       |
| 0.005µM       | 6.06        | 6.96    | 3.67        | 5.97    | 2.86        | 4.89    |             | 10.14   | 2.18        | 0.85    |        |                       |
| 0.01µM        | 3.98        | 6.77    | 3.74        | 11.3    | 2.30        | 8.71    |             | 12.27   | 1.96        | 0.21    |        |                       |
| 0.1µM         | 4.74        | 20.7    | 4.46        | 24.0    | 2.51        | 23.4    |             | 26.60   | 1.33        | <0.001  |        |                       |
|               |             |         |             |         |             |         |             |         |             |         |        |                       |
| T3M4          |             |         |             |         |             |         |             |         |             | Mean    | SD     | P-Value (vs. Control) |
|               | 1st         |         | 2nd         |         | 3rd         |         |             |         |             |         |        |                       |
| Concentration | G2(YP+/PI-) | G3(PI+) | G2(YP+/PI-) | G3(PI+) | G2(YP+/PI-) | G3(PI+) |             | G2+G3   |             |         |        |                       |
| Control       | 3.51        | 7.45    | 4.90        | 5.44    | 5.44        | 5.72    |             | 10.82   | 0.35        |         |        |                       |
| 0.003µM       | 4.53        | 4.93    | 5.80        | 4.77    | 5.55        | 3.65    |             | 9.74    | 0.59        | 0.90    |        |                       |
| 0.005µM       | 3.16        | 5.63    | 3.93        | 4.64    | 4.53        | 3.55    |             | 8.48    | 0.30        | 0.43    |        |                       |
| 0.0075µM      | 6.09        | 11.7    | 5.98        | 12.6    | 6.29        | 8.05    |             | 16.90   | 1.84        | 0.01    |        |                       |
| 0.01µM        | 9.13        | 13.8    | 10.6        | 19.0    | 11.6        | 12.3    |             | 25.48   | 2.94        | <0.001  |        |                       |

G2: Apoptosis  
G3: Necrosis  
G2+G3: Cell Deaths

| Supplementary Table S7 - Target Gene Expression (Log2(TPM+1)) |                            |                |               |                         |             |             |             |
|---------------------------------------------------------------|----------------------------|----------------|---------------|-------------------------|-------------|-------------|-------------|
|                                                               | Silmitasertib Target Genes |                |               | Dinaciclib Target Genes |             |             |             |
|                                                               | <i>CSNK2A1</i>             | <i>CSNK2A2</i> | <i>CSNK2B</i> | <i>CDK1</i>             | <i>CDK2</i> | <i>CDK5</i> | <i>CDK9</i> |
| AsPc-1                                                        | 6.50                       | 5.46           | 6.53          | 7.01                    | 5.03        | 5.04        | 4.95        |
| BxPc-3                                                        | 6.75                       | 5.44           | 6.78          | 7.25                    | 5.54        | 5.32        | 5.65        |
| Capan-1                                                       | 6.59                       | 5.42           | 7.52          | 5.73                    | 5.42        | 5.68        | 5.32        |
| Colo357                                                       | 6.76                       | 5.51           | 6.73          | 6.50                    | 4.37        | 3.96        | 4.57        |
| Panc-1                                                        | 7.69                       | 5.41           | 7.70          | 7.21                    | 5.61        | 5.10        | 4.87        |
| SU.86.86                                                      | 5.83                       | 5.68           | 7.28          | 6.71                    | 5.31        | 4.08        | 5.37        |
| PaTu8988S                                                     | 6.99                       | 5.63           | 7.26          | 7.14                    | 5.17        | 4.53        | 5.47        |
| PaTu8988T                                                     | 7.01                       | 6.47           | 7.45          | 7.55                    | 6.19        | 4.01        | 5.28        |
| PaTu8902                                                      | 7.15                       | 6.42           | 7.41          | 8.51                    | 6.85        | 3.51        | 5.38        |
| T3M4                                                          | 6.91                       | 6.12           | 7.07          | 6.33                    | 6.06        | 3.98        | 6.63        |
| Control                                                       | 3.63                       | 4.43           | 6.00          | 0.41                    | 2.83        | 1.98        | 4.50        |

Supplementary Table S8 - Silmitasertib Target Gene Variants in PDAC Cell Lines

| Cell line | #Chromosome | Start    | End      | Reference | Observed | Zygosity | Variant | Confidance | Variant Allele | Frequency | Reading Depth | Gene    | Base Change                                   | Animo Acin Change | Variant Type          |
|-----------|-------------|----------|----------|-----------|----------|----------|---------|------------|----------------|-----------|---------------|---------|-----------------------------------------------|-------------------|-----------------------|
| BxPc-3    | chr20       | 464502   | 464502   | G         | T        | het      |         | 74.77      |                | 33.3      | 18            | CSNK2A1 | NM_001895.3:c.103C>A                          | -                 | 3_prime_UTR_variant   |
| BxPc-3    | chr20       | 468419   | 468419   | G         | A        | het      |         | 10.43      |                | 66.7      | 3             | CSNK2A1 | NM_001895.3:c.825-200C>T                      | -                 | intron_variant        |
| BxPc-3    | chr20       | 480619   | 480621   | AA        | T        | hom      |         | 804.73     |                | 100       | 64            | CSNK2A1 | NM_001895.3:c.214-42_214-41delTTinsA          | -                 | intron_variant        |
| BxPc-3    | chr20       | 483933   | 483933   | C         | T        | het      |         | 187.77     |                | 61.5      | 13            | CSNK2A1 | NM_001895.3:c.213+1829G>A                     | -                 | intron_variant        |
| Capan-1   | chr20       | 464502   | 464502   | G         | T        | het      |         | 63.77      |                | 23.5      | 17            | CSNK2A1 | NM_001895.3:c.103C>A                          | -                 | 3_prime_UTR_variant   |
| Capan-1   | chr20       | 467240   | 467240   | T         | C        | het      |         | 161.77     |                | 66.7      | 12            | CSNK2A1 | NM_001895.3:c.974-134A>G                      | -                 | intron_variant        |
| Panc-1    | chr20       | 464502   | 464502   | G         | T        | het      |         | 24.78      |                | 37.5      | 8             | CSNK2A1 | NM_001895.3:c.103C>A                          | -                 | 3_prime_UTR_variant   |
| Panc-1    | chr20       | 480619   | 480621   | AA        | T        | hom      |         | 564.73     |                | 100       | 41            | CSNK2A1 | NM_001895.3:c.214-42_214-41delTTinsA          | -                 | intron_variant        |
| Panc-1    | chr20       | 483933   | 483933   | C         | T        | hom      |         | 473.77     |                | 100       | 15            | CSNK2A1 | NM_001895.3:c.213+1829G>A                     | -                 | intron_variant        |
| PaTu8902  | chr20       | 464502   | 464502   | G         | T        | het      |         | 36.77      |                | 33.3      | 15            | CSNK2A1 | NM_001895.3:c.103C>A                          | -                 | 3_prime_UTR_variant   |
| PaTu8988T | chr20       | 464502   | 464502   | G         | T        | het      |         | 36.77      |                | 23.1      | 13            | CSNK2A1 | NM_001895.3:c.103C>A                          | -                 | 3_prime_UTR_variant   |
| PaTu8988T | chr20       | 485995   | 486020   | GTT       | G        | hom      |         | 42.45      |                | 66.7      | 3             | CSNK2A1 | NM_001895.3:c.102-124_102-123delAA            | -                 | intron_variant        |
| PaTu8988S | chr20       | 464502   | 464502   | G         | T        | het      |         | 43.77      |                | 27.3      | 11            | CSNK2A1 | NM_001895.3:c.103C>A                          | -                 | 3_prime_UTR_variant   |
| T3M4      | chr20       | 480619   | 480621   | AA        | T        | hom      |         | 453.73     |                | 100       | 29            | CSNK2A1 | NM_001895.3:c.214-42_214-41delTTinsA          | -                 | intron_variant        |
| BxPc-3    | chr16       | 58204541 | 58204541 | C         | A        | hom      |         | 181.84     |                | 100       | 6             | CSNK2A2 | NM_001896.2:c.430-1944G>T                     | -                 | intron_variant        |
| PaTu8988T | chr16       | 58200863 | 58200863 | T         | C        | het      |         | 12.05      |                | 66.7      | 3             | CSNK2A2 | NM_001896.2:c.726+248A>G                      | -                 | intron_variant        |
| PaTu8988T | chr16       | 58208602 | 58208602 | G         | A        | hom      |         | 29.12      |                | 100       | 3             | CSNK2A2 | NM_001896.2:c.370-186C>T                      | -                 | intron_variant        |
| PaTu8988T | chr16       | 58208605 | 58208605 | G         | A        | het      |         | 10.48      |                | 66.7      | 3             | CSNK2A2 | NM_001896.2:c.370-191C>T                      | -                 | intron_variant        |
| PaTu8988S | chr16       | 58208605 | 58208616 | G         | GA       | het      |         | 28.17      |                | 66.7      | 3             | CSNK2A2 | NM_001896.2:c.370-192dupT                     | -                 | intron_variant        |
| T3M4      | chr16       | 58200616 | 58200618 | CA        | TC       | het      |         | 253.75     |                | 39        | 41            | CSNK2A2 | NM_001896.2:c.727-29_727-28delTGinsGA         | -                 | intron_variant        |
| T3M4      | chr16       | 58200946 | 58200948 | CG        | C        | het      |         | 97.76      |                | 80        | 5             | CSNK2A2 | NM_001896.2:c.726+164delC                     | -                 | intron_variant        |
| T3M4      | chr16       | 58230796 | 58230796 | A         | C        | het      |         | 164.77     |                | 28.1      | 32            | CSNK2A2 | NM_001896.2:c.105-48T>G                       | -                 | intron_variant        |
| AsPc-1    | chr6        | 31635960 | 31635968 | ATTCCAAA  | C        | hom      |         | 39.48      |                | 100       | 3             | CSNK2B  | NM_001320.6:c.175+213_175+220delATTCCAAAsinsC | -                 | upstream_gene_variant |
| T3M4      | chr6        | 31635960 | 31635968 | ATTCCAAA  | C        | hom      |         | 78.03      |                | 100       | 4             | CSNK2B  | NM_001320.6:c.175+213_175+220delATTCCAAAsinsC | -                 | upstream_gene_variant |

Supplementary Table S9 - Dinaciclib Target Gene Variants in PDAC Cell Lines

| Cell line | #Chromosome | Start     | End       | Reference | Observed | Zygosity | Variant | Confidance | Variant Allele Frequency | Reading Depth | Gene | Base Change                              | Animo Acin Change | Variant Type            |
|-----------|-------------|-----------|-----------|-----------|----------|----------|---------|------------|--------------------------|---------------|------|------------------------------------------|-------------------|-------------------------|
| BxPc-3    | chr10       | 62551889  | 62551891  | AA        | GT       | hom      | 2437.28 |            | 100                      | 89            | CDK1 | NM_001320918.1:c.654-17_654-16delAAinsGT | -                 | intron_variant          |
| Capan-1   | chr10       | 62551889  | 62551891  | AA        | GT       | het      | 868.19  |            | 34.3                     | 143           | CDK1 | NM_001320918.1:c.654-17_654-16delAAinsGT | -                 | intron_variant          |
| Colo357   | chr10       | 62544705  | 62544705  | A         | G        | het      | 298.77  |            | 36.7                     | 30            | CDK1 | NM_001320918.1:c.194+86A>G               | -                 | intron_variant          |
| Colo357   | chr10       | 62551889  | 62551891  | AA        | GT       | het      | 5363.03 |            | 100                      | 90            | CDK1 | NM_001320918.1:c.654-17_654-16delAAinsGT | -                 | intron_variant          |
| Panc-1    | chr10       | 62551889  | 62551891  | AA        | GT       | hom      | 2701.24 |            | 100                      | 101           | CDK1 | NM_001320918.1:c.654-17_654-16delAAinsGT | -                 | intron_variant          |
| PaTu8902  | chr10       | 62551889  | 62551891  | AA        | GT       | hom      | 2325.28 |            | 100                      | 82            | CDK1 | NM_001320918.1:c.654-17_654-16delAAinsGT | -                 | intron_variant          |
| PaTu8988T | chr10       | 62551889  | 62551891  | AA        | GT       | hom      | 2602.46 |            | 100                      | 96            | CDK1 | NM_001320918.1:c.654-17_654-16delAAinsGT | -                 | intron_variant          |
| PaTu8988S | chr10       | 62551889  | 62551891  | AA        | GT       | hom      | 2186.77 |            | 100                      | 80            | CDK1 | NM_001320918.1:c.654-17_654-16delAAinsGT | -                 | intron_variant          |
| SU.86.86  | chr10       | 62551889  | 62551891  | AA        | GT       | hom      | 1368.8  |            | 100                      | 52            | CDK1 | NM_001320918.1:c.654-17_654-16delAAinsGT | -                 | intron_variant          |
| BxPc-3    | chr12       | 56364719  | 56364719  | T         | A        | het      | 10.5    |            | 30                       | 10            | CDK2 | NM_001798.4:c.589-109T>A                 | -                 | upstream_gene_variant   |
| Colo357   | chr12       | 56360765  | 56360765  | C         | T        | hom      | 1693.77 |            | 100                      | 71            | CDK2 | NM_001798.4:c.-28C>T                     | -                 | 5_prime_UTR_variant     |
| Colo357   | chr12       | 56361521  | 56361527  | TTC       | T        | hom      | 571.73  |            | 100                      | 14            | CDK2 | NM_001798.4:c.117-115,117-114delTTC      | -                 | upstream_gene_variant   |
| Colo357   | chr12       | 56362111  | 56362111  | A         | G        | hom      | 92.03   |            | 100                      | 5             | CDK2 | NM_001798.4:c.315+158A>G                 | -                 | upstream_gene_variant   |
| Panc-1    | chr7        | 150751809 | 150751809 | C         | A        | het      | 12.05   |            | 66.7                     | 3             | CDK5 | NM_004935.3:c.651-257G>T                 | -                 | upstream_gene_variant   |
| Colo357   | chr9        | 130548593 | 130548595 | G         | CCA      | het      | 33.47   |            | 72.7                     | 11            | CDK9 | NM_001261.3:c.92+75_92+76insAC           | -                 | downstream_gene_variant |

Supplementary Table S10 - *KRAS* Variants in PDAC Cell Lines

| Cell line | #Chromosome | Start    | End      | Reference | Observed | Zygositities | Variant Confidence | Variant Allele Frequency | Reading Depth | Gene        | Base Change          | Animo Acin Change      | Variant Type     |
|-----------|-------------|----------|----------|-----------|----------|--------------|--------------------|--------------------------|---------------|-------------|----------------------|------------------------|------------------|
| AsPc-1    | chr12       | 25398284 | 25398284 | C         | T        | hom          | 2219.77            | 100                      | 90            | <i>KRAS</i> | NM_033360.2:c.35G>A  | NM_033360.2:p.Gly12Asp | missense_variant |
| Capan-1   | chr12       | 25398284 | 25398284 | C         | A        | hom          | 1774.77            | 97.1                     | 70            | <i>KRAS</i> | NM_033360.2:c.35G>T  | NM_033360.2:p.Gly12Val | missense_variant |
| Colo357   | chr12       | 25398284 | 25398284 | C         | T        | het          | 403.77             | 23.8                     | 126           | <i>KRAS</i> | NM_033360.2:c.35G>A  | NM_033360.2:p.Gly12Asp | missense_variant |
| Panc-1    | chr12       | 25398284 | 25398284 | C         | T        | het          | 2675.77            | 62.1                     | 203           | <i>KRAS</i> | NM_033360.2:c.35G>A  | NM_033360.2:p.Gly12Asp | missense_variant |
| PaTu8902  | chr12       | 25398284 | 25398284 | C         | A        | hom          | 1052.77            | 100                      | 42            | <i>KRAS</i> | NM_033360.2:c.35G>T  | NM_033360.2:p.Gly12Val | missense_variant |
| PaTu8988T | chr12       | 25398284 | 25398284 | C         | A        | hom          | 1212.77            | 98                       | 49            | <i>KRAS</i> | NM_033360.2:c.35G>T  | NM_033360.2:p.Gly12Val | missense_variant |
| PaTu8988S | chr12       | 25398284 | 25398284 | C         | A        | hom          | 1541.77            | 96.9                     | 65            | <i>KRAS</i> | NM_033360.2:c.35G>T  | NM_033360.2:p.Gly12Val | missense_variant |
| SU.86.86  | chr12       | 25398284 | 25398284 | C         | T        | het          | 6018.77            | 83.7                     | 319           | <i>KRAS</i> | NM_033360.2:c.35G>A  | NM_033360.2:p.Gly12Asp | missense_variant |
| T3M4      | chr12       | 25380275 | 25380275 | A         | C        | het          | 709.77             | 32.6                     | 129           | <i>KRAS</i> | NM_033360.2:c.183A>C | NM_033360.2:p.Gln61His | missense_variant |

Supplementary Table S11 - *TP53* Variants in PDAC Cell Lines

| Cell line | #Chromosome | Start   | End     | Reference | Observed | Zygosity | Variant Confidence | Variant Allele Frequency | Reading Depth | Gene        | Base Change           | Amino Acid Change       | Variant Type       |
|-----------|-------------|---------|---------|-----------|----------|----------|--------------------|--------------------------|---------------|-------------|-----------------------|-------------------------|--------------------|
| AsPc-1    | chr17       | 7578526 | 7578530 | CA        | C        | hom      | 3365.77            | 96.4                     | 110           | <i>TP53</i> | NM_000546.4:c.403delT | NM_000546.4:p.Cys135fs  | frameshift_variant |
| Panc-1    | chr17       | 7577120 | 7577120 | C         | T        | hom      | 1977.77            | 98.8                     | 81            | <i>TP53</i> | NM_000546.4:c.818G>A  | NM_000546.4:p.Arg273His | missense_variant   |
| BxPc-3    | chr17       | 7578190 | 7578190 | T         | C        | hom      | 2653.77            | 99                       | 103           | <i>TP53</i> | NM_000546.4:c.659A>G  | NM_000546.4:p.Tyr220Cys | missense_variant   |
| Capan-1   | chr17       | 7578454 | 7578454 | G         | A        | hom      | 2094.77            | 100                      | 83            | <i>TP53</i> | NM_000546.4:c.476C>T  | NM_000546.4:p.Ala159Val | missense_variant   |
| Colo357   | chr17       | 7579419 | 7579424 | AG        | A        | hom      | 4167.73            | 100                      | 130           | <i>TP53</i> | NM_000546.4:c.267delC | NM_000546.4:p.Ser90fs   | frameshift_variant |
| PaTu8902  | chr17       | 7577094 | 7577094 | G         | A        | hom      | 2250.77            | 100                      | 79            | <i>TP53</i> | NM_000546.4:c.844C>T  | NM_000546.4:p.Arg282Trp | missense_variant   |
| PaTu8988T | chr17       | 7577094 | 7577094 | G         | A        | hom      | 1503.77            | 100                      | 57            | <i>TP53</i> | NM_000546.4:c.844C>T  | NM_000546.4:p.Arg282Trp | missense_variant   |
| PaTu8988S | chr17       | 7577094 | 7577094 | G         | A        | hom      | 2498.77            | 100                      | 97            | <i>TP53</i> | NM_000546.4:c.844C>T  | NM_000546.4:p.Arg282Trp | missense_variant   |
| SU.86.86  | chr17       | 7573948 | 7573948 | C         | A        | hom      | 665.77             | 100                      | 24            | <i>TP53</i> | NM_000546.4:c.1079G>T | NM_000546.4:p.Gly360Val | missense_variant   |
| SU.86.86  | chr17       | 7577548 | 7577548 | C         | T        | hom      | 1415.77            | 100                      | 54            | <i>TP53</i> | NM_000546.4:c.733G>A  | NM_000546.4:p.Gly245Ser | missense_variant   |
| T3M4      | chr17       | 7578190 | 7578190 | T         | C        | hom      | 2061.77            | 100                      | 78            | <i>TP53</i> | NM_000546.4:c.659A>G  | NM_000546.4:p.Tyr220Cys | missense_variant   |



Supplementary Table S12 - Gene expression *KRAS* ( $\text{Log}_2(\text{TPM}+1)$ )

|           | <i>KRAS</i> Expression |
|-----------|------------------------|
| AsPc-1    | 4.79                   |
| BxPc-3    | 4.53                   |
| Capan-1   | 4.40                   |
| Colo357   | 4.16                   |
| Panc-1    | 6.11                   |
| PaTu8902  | 4.51                   |
| PaTu8988S | 4.65                   |
| PaTu8988T | 4.46                   |
| SU.86.86  | 7.09                   |
| T3M4      | 5.79                   |
| Control   | 2.14                   |

Supplementary Table S13 - Gene expression *TP53* (Log<sub>2</sub>(TPM+1))

|           | <i>TP53</i> Expression |
|-----------|------------------------|
| AsPc-1    | 1.24                   |
| BxPc-3    | 5.42                   |
| Capan-1   | 4.39                   |
| Colo357   | 2.13                   |
| Panc-1    | 5.29                   |
| PaTu8902  | 5.37                   |
| PaTu8988S | 5.35                   |
| PaTu8988T | 5.34                   |
| SU.86.86  | 4.61                   |
| T3M4      | 5.26                   |
| Control   | 2.83                   |
